# Supplementary material for: Pattern of SARS-CoV-2 variant B.1.1.519 emergence in Alaska
Source: PubMed Central journal article supplement (PMC9712339; doi:10.1038/s41598-022-25373-1), 2022-11-30
Supplement: 41598_2022_25373_MOESM1_ESM.pdf [file 41598_2022_25373_MOESM1_ESM.pdf]

# Pattern of SARS-CoV-2 variant B.1.1.519 emergence in Alaska

Tracie J. Haan<sup>1</sup>, Lisa K. Smith<sup>2</sup>, Stephanie DeRonde<sup>2</sup>, Elva House<sup>2</sup>, Jacob Zidek<sup>2</sup>, Diana Puhak<sup>2</sup>, Matthew Redlinger<sup>3</sup>, Jayme Parker<sup>2</sup>, Brian M. Barnes<sup>1</sup>, Jason L. Burkhead<sup>3</sup>, Cindy Knall<sup>4</sup>, Eric Bortz<sup>3,4,\*</sup>, Jack Chen<sup>1,2,5,\*</sup>, and Devin M. Drown<sup>1,5,\*</sup>

<sup>1</sup> Institute of Arctic Biology, University of Alaska Fairbanks, Fairbanks, Alaska, USA

<sup>2</sup> Alaska Division of Public Health, State of Alaska, Fairbanks, Alaska, USA

<sup>3</sup> Department of Biological Sciences, University of Alaska Anchorage, Anchorage, Alaska, USA

<sup>4</sup> WWAMI School of Medical Education, University of Alaska Anchorage, Anchorage, Alaska, USA

<sup>5</sup> Department of Biology and Wildlife, University of Alaska Fairbanks, Fairbanks, Alaska, USA

\* Corresponding authors: Devin M. Drown, [dmdrown@alaska.edu](mailto:dmdrown@alaska.edu); Eric Bortz, [ebortz@alaska.edu](mailto:ebortz@alaska.edu); Jack Chen, [jchen15@alaska.edu](mailto:jchen15@alaska.edu)

Supplemental Figures.

## Emergence of B.1.1.519 in Alaska

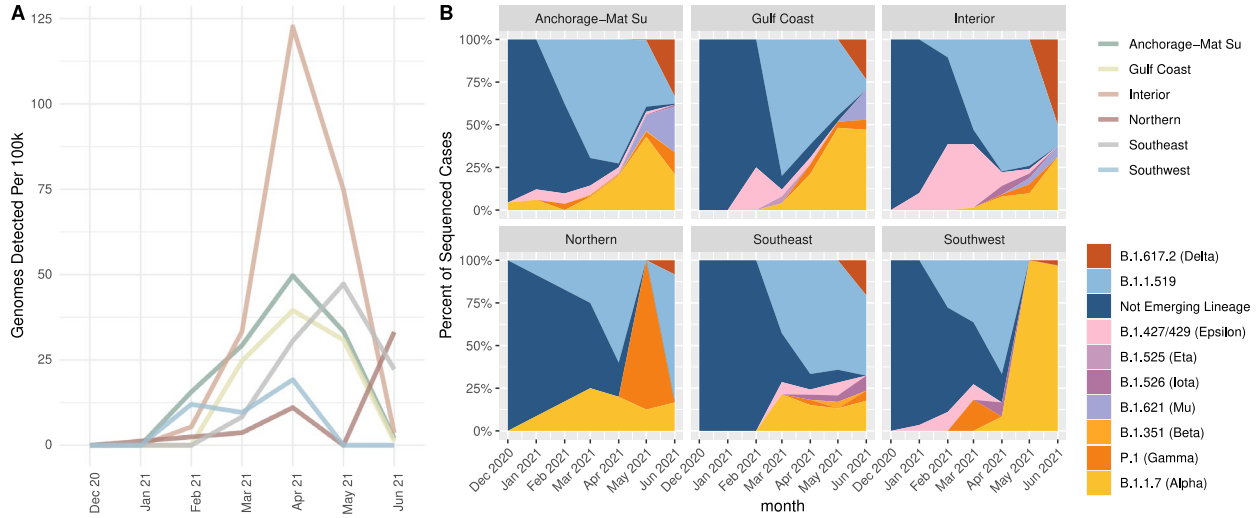

**Figure S1.** (A) Number of detected B.1.1.519 genomes per 100k people by Alaska economic region over time. Lines are colored by Alaska economic region. (B) Estimated prevalence of emerging lineages by Alaska economic region from December 2020 through June 2021.

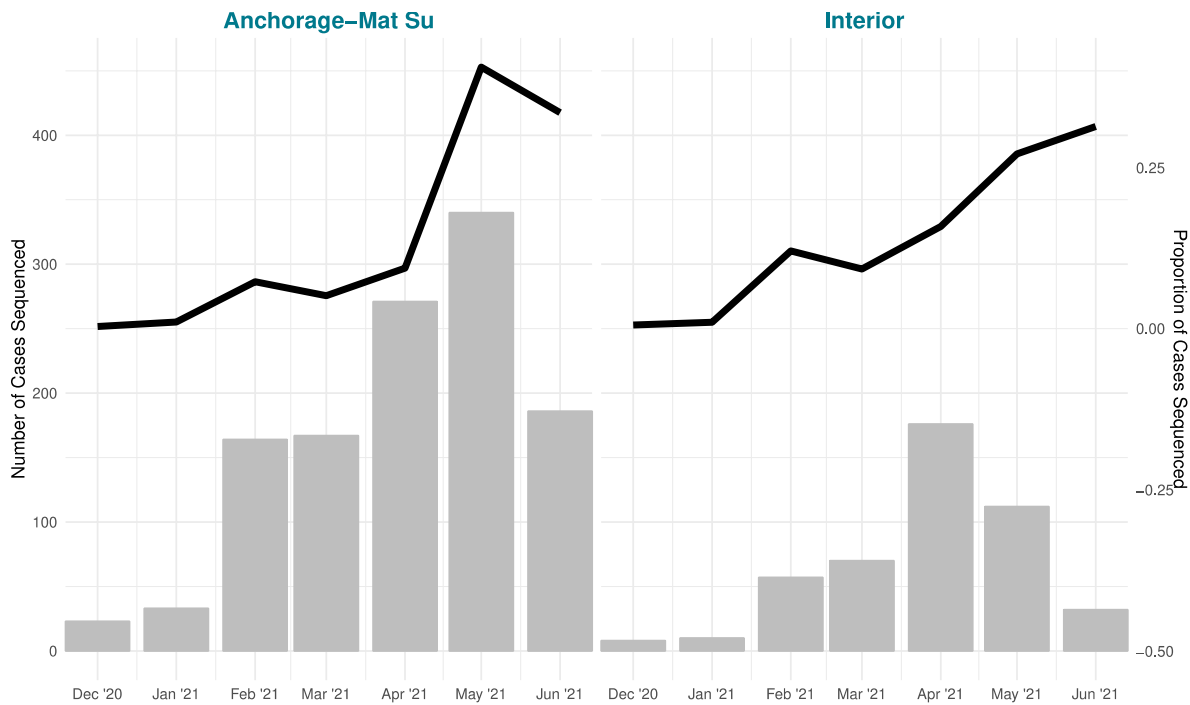

**Figure S2.** Number of cases sequenced (bars) and the proportion of total cases sequenced in the Anchorage–Mat Su and Interior economic regions of Alaska.

We gratefully acknowledge the authors, originating and submitting laboratories of the sequences from GISAID's EpiFlu. All submitters of data may be contacted directly via [www.gisaid.org](http://www.gisaid.org)

| Virus Name                           | Accession ID    | Collection Date | Originating Lab                  | Submitting Lab                                                                               | Authors                                                                                                                                                                                                                                                                                                                                                                                                                            |
|--------------------------------------|-----------------|-----------------|----------------------------------|----------------------------------------------------------------------------------------------|------------------------------------------------------------------------------------------------------------------------------------------------------------------------------------------------------------------------------------------------------------------------------------------------------------------------------------------------------------------------------------------------------------------------------------|
| hCoV-19/USA/AK-CDC-ASC210010031/2021 | EPI_ISL_1649624 | 3/18/2021       | Aegis Sciences Corporation       | Centers for Disease Control and Prevention<br>Division of Viral Diseases, Pathogen Discovery | Dakota Howard, Dhvani Batra, Peter W. Cook, Kara Moser, Adrian Paskey, Jason Caravas, Benjamin Rambo-Martin, Shatavia Morrison, Christopher Gulvick, Scott Sammons, Yvette Unoarumhi, Darlene Wagner, Matthew Schmeer, Cyndi Clark, Patrick Campbell, Rob Case, Vikramsinha Ghorpade, Holly Houdeshell, Ola Kvalvaag, Dillon Nall, Ethan Sanders, Alec Vest, Shaun Westlund, Matthew Hardison, Clinton R. Paden, Duncan MacCannell |
| hCoV-19/USA/AK-PHL7461/2021          | EPI_ISL_1652201 | 3/5/2021        | Alaska State Virology Laboratory | Alaska State Virology Laboratory                                                             | Stephanie DeRonde, Elva House, Lisa Smith, Ph.D., Jack Chen, Ph.D.                                                                                                                                                                                                                                                                                                                                                                 |
| hCoV-19/USA/AK-PHL7462/2021          | EPI_ISL_1652202 | 3/5/2021        | Alaska State Virology Laboratory | Alaska State Virology Laboratory                                                             | Stephanie DeRonde, Elva House, Lisa Smith, Ph.D., Jack Chen, Ph.D.                                                                                                                                                                                                                                                                                                                                                                 |
| hCoV-19/USA/AK-PHL7463/2021          | EPI_ISL_1652203 | 3/5/2021        | Alaska State Virology Laboratory | Alaska State Virology Laboratory                                                             | Stephanie DeRonde, Elva House, Lisa Smith, Ph.D., Jack Chen, Ph.D.                                                                                                                                                                                                                                                                                                                                                                 |
| hCoV-19/USA/AK-PHL7465/2021          | EPI_ISL_1652204 | 3/5/2021        | Alaska State Virology Laboratory | Alaska State Virology Laboratory                                                             | Stephanie DeRonde, Elva House, Lisa Smith, Ph.D., Jack Chen, Ph.D.                                                                                                                                                                                                                                                                                                                                                                 |
| hCoV-19/USA/AK-PHL7466/2021          | EPI_ISL_1652205 | 3/5/2021        | Alaska State Virology Laboratory | Alaska State Virology Laboratory                                                             | Stephanie DeRonde, Elva House, Lisa Smith, Ph.D., Jack Chen, Ph.D.                                                                                                                                                                                                                                                                                                                                                                 |
| hCoV-19/USA/AK-PHL7467/2021          | EPI_ISL_1652206 | 3/5/2021        | Alaska State Virology Laboratory | Alaska State Virology Laboratory                                                             | Stephanie DeRonde, Elva House, Lisa Smith, Ph.D., Jack Chen, Ph.D.                                                                                                                                                                                                                                                                                                                                                                 |
| hCoV-19/USA/AK-PHL7470/2021          | EPI_ISL_1652207 | 3/6/2021        | Alaska State Virology Laboratory | Alaska State Virology Laboratory                                                             | Stephanie DeRonde, Elva House, Lisa Smith, Ph.D., Jack Chen, Ph.D.                                                                                                                                                                                                                                                                                                                                                                 |
| hCoV-19/USA/AK-PHL7471/2021          | EPI_ISL_1652208 | 3/6/2021        | Alaska State Virology Laboratory | Alaska State Virology Laboratory                                                             | Stephanie DeRonde, Elva House, Lisa Smith, Ph.D., Jack Chen, Ph.D.                                                                                                                                                                                                                                                                                                                                                                 |
| hCoV-19/USA/AK-PHL7472/2021          | EPI_ISL_1652209 | 3/6/2021        | Alaska State Virology Laboratory | Alaska State Virology Laboratory                                                             | Stephanie DeRonde, Elva House, Lisa Smith, Ph.D., Jack Chen, Ph.D.                                                                                                                                                                                                                                                                                                                                                                 |
| hCoV-19/USA/AK-PHL7474/2021          | EPI_ISL_1652211 | 3/6/2021        | Alaska State Virology Laboratory | Alaska State Virology Laboratory                                                             | Stephanie DeRonde, Elva House, Lisa Smith, Ph.D., Jack Chen, Ph.D.                                                                                                                                                                                                                                                                                                                                                                 |
| hCoV-19/USA/AK-PHL7475/2021          | EPI_ISL_1652212 | 3/6/2021        | Alaska State Virology Laboratory | Alaska State Virology Laboratory                                                             | Stephanie DeRonde, Elva House, Lisa Smith, Ph.D., Jack Chen, Ph.D.                                                                                                                                                                                                                                                                                                                                                                 |
| hCoV-19/USA/AK-PHL7476/2021          | EPI_ISL_1652213 | 3/6/2021        | Alaska State Virology Laboratory | Alaska State Virology Laboratory                                                             | Stephanie DeRonde, Elva House, Lisa Smith, Ph.D., Jack Chen, Ph.D.                                                                                                                                                                                                                                                                                                                                                                 |
| hCoV-19/USA/AK-PHL7478/2021          | EPI_ISL_1652214 | 3/6/2021        | Alaska State Virology Laboratory | Alaska State Virology Laboratory                                                             | Stephanie DeRonde, Elva House, Lisa Smith, Ph.D., Jack Chen, Ph.D.                                                                                                                                                                                                                                                                                                                                                                 |
| hCoV-19/USA/AK-PHL7479/2021          | EPI_ISL_1652215 | 3/6/2021        | Alaska State Virology Laboratory | Alaska State Virology Laboratory                                                             | Stephanie DeRonde, Elva House, Lisa Smith, Ph.D., Jack Chen, Ph.D.                                                                                                                                                                                                                                                                                                                                                                 |
| hCoV-19/USA/AK-PHL7480/2021          | EPI_ISL_1652216 | 3/6/2021        | Alaska State Virology Laboratory | Alaska State Virology Laboratory                                                             | Stephanie DeRonde, Elva House, Lisa Smith, Ph.D., Jack Chen, Ph.D.                                                                                                                                                                                                                                                                                                                                                                 |
| hCoV-19/USA/AK-PHL7481/2021          | EPI_ISL_1652217 | 3/6/2021        | Alaska State Virology Laboratory | Alaska State Virology Laboratory                                                             | Stephanie DeRonde, Elva House, Lisa Smith, Ph.D., Jack Chen, Ph.D.                                                                                                                                                                                                                                                                                                                                                                 |
| hCoV-19/USA/AK-PHL7485/2021          | EPI_ISL_1652220 | 3/6/2021        | Alaska State Virology Laboratory | Alaska State Virology Laboratory                                                             | Stephanie DeRonde, Elva House, Lisa Smith, Ph.D., Jack Chen, Ph.D.                                                                                                                                                                                                                                                                                                                                                                 |
| hCoV-19/USA/AK-PHL7486/2021          | EPI_ISL_1652221 | 3/5/2021        | Alaska State Virology Laboratory | Alaska State Virology Laboratory                                                             | Stephanie DeRonde, Elva House, Lisa Smith, Ph.D., Jack Chen, Ph.D.                                                                                                                                                                                                                                                                                                                                                                 |
| hCoV-19/USA/AK-PHL7487/2021          | EPI_ISL_1652222 | 3/6/2021        | Alaska State Virology Laboratory | Alaska State Virology Laboratory                                                             | Stephanie DeRonde, Elva House, Lisa Smith, Ph.D., Jack Chen, Ph.D.                                                                                                                                                                                                                                                                                                                                                                 |
| hCoV-19/USA/AK-PHL7489/2021          | EPI_ISL_1652224 | 3/6/2021        | Alaska State Virology Laboratory | Alaska State Virology Laboratory                                                             | Stephanie DeRonde, Elva House, Lisa Smith, Ph.D., Jack Chen, Ph.D.                                                                                                                                                                                                                                                                                                                                                                 |
| hCoV-19/USA/AK-PHL7491/2021          | EPI_ISL_1652225 | 3/5/2021        | Alaska State Virology Laboratory | Alaska State Virology Laboratory                                                             | Stephanie DeRonde, Elva House, Lisa Smith, Ph.D., Jack Chen, Ph.D.                                                                                                                                                                                                                                                                                                                                                                 |
| hCoV-19/USA/AK-PHL7493/2021          | EPI_ISL_1652227 | 3/6/2021        | Alaska State Virology Laboratory | Alaska State Virology Laboratory                                                             | Stephanie DeRonde, Elva House, Lisa Smith, Ph.D., Jack Chen, Ph.D.                                                                                                                                                                                                                                                                                                                                                                 |
| hCoV-19/USA/AK-PHL7495/2021          | EPI_ISL_1652228 | 3/6/2021        | Alaska State Virology Laboratory | Alaska State Virology Laboratory                                                             | Stephanie DeRonde, Elva House, Lisa Smith, Ph.D., Jack Chen, Ph.D.                                                                                                                                                                                                                                                                                                                                                                 |
| hCoV-19/USA/AK-PHL7497/2021          | EPI_ISL_1652229 | 3/6/2021        | Alaska State Virology Laboratory | Alaska State Virology Laboratory                                                             | Stephanie DeRonde, Elva House, Lisa Smith, Ph.D., Jack Chen, Ph.D.                                                                                                                                                                                                                                                                                                                                                                 |
| hCoV-19/USA/AK-PHL7498/2021          | EPI_ISL_1652230 | 3/6/2021        | Alaska State Virology Laboratory | Alaska State Virology Laboratory                                                             | Stephanie DeRonde, Elva House, Lisa Smith, Ph.D., Jack Chen, Ph.D.                                                                                                                                                                                                                                                                                                                                                                 |
| hCoV-19/USA/AK-PHL7503/2021          | EPI_ISL_1652234 | 3/6/2021        | Alaska State Virology Laboratory | Alaska State Virology Laboratory                                                             | Stephanie DeRonde, Elva House, Lisa Smith, Ph.D., Jack Chen, Ph.D.                                                                                                                                                                                                                                                                                                                                                                 |
| hCoV-19/USA/AK-PHL7504/2021          | EPI_ISL_1652235 | 3/6/2021        | Alaska State Virology Laboratory | Alaska State Virology Laboratory                                                             | Stephanie DeRonde, Elva House, Lisa Smith, Ph.D., Jack Chen, Ph.D.                                                                                                                                                                                                                                                                                                                                                                 |
| hCoV-19/USA/AK-PHL7506/2021          | EPI_ISL_1652236 | 3/4/2021        | Alaska State Virology Laboratory | Alaska State Virology Laboratory                                                             | Stephanie DeRonde, Elva House, Lisa Smith, Ph.D., Jack Chen, Ph.D.                                                                                                                                                                                                                                                                                                                                                                 |
| hCoV-19/USA/AK-PHL7970/2021          | EPI_ISL_1653895 | 4/2/2021        | Alaska State Virology Laboratory | Alaska State Virology Laboratory                                                             | Stephanie DeRonde, Elva House, Lisa Smith, Ph.D., Jack Chen, Ph.D.                                                                                                                                                                                                                                                                                                                                                                 |
| hCoV-19/USA/AK-PHL7971/2021          | EPI_ISL_1653896 | 4/4/2021        | Alaska State Virology Laboratory | Alaska State Virology Laboratory                                                             | Stephanie DeRonde, Elva House, Lisa Smith, Ph.D., Jack Chen, Ph.D.                                                                                                                                                                                                                                                                                                                                                                 |
| hCoV-19/USA/AK-PHL7973/2021          | EPI_ISL_1653897 | 4/4/2021        | Alaska State Virology Laboratory | Alaska State Virology Laboratory                                                             | Stephanie DeRonde, Elva House, Lisa Smith, Ph.D., Jack Chen, Ph.D.                                                                                                                                                                                                                                                                                                                                                                 |
| hCoV-19/USA/AK-PHL7975/2021          | EPI_ISL_1653898 | 4/5/2021        | Alaska State Virology Laboratory | Alaska State Virology Laboratory                                                             | Stephanie DeRonde, Elva House, Lisa Smith, Ph.D., Jack Chen, Ph.D.                                                                                                                                                                                                                                                                                                                                                                 |
| hCoV-19/USA/AK-PHL7992/2021          | EPI_ISL_1653899 | 4/7/2021        | Alaska State Virology Laboratory | Alaska State Virology Laboratory                                                             | Stephanie DeRonde, Elva House, Lisa Smith, Ph.D., Jack Chen, Ph.D.                                                                                                                                                                                                                                                                                                                                                                 |
| hCoV-19/USA/AK-PHL7993/2021          | EPI_ISL_1653900 | 4/7/2021        | Alaska State Virology Laboratory | Alaska State Virology Laboratory                                                             | Stephanie DeRonde, Elva House, Lisa Smith, Ph.D., Jack Chen, Ph.D.                                                                                                                                                                                                                                                                                                                                                                 |
| hCoV-19/USA/AK-PHL7996/2021          | EPI_ISL_1653903 | 4/7/2021        | Alaska State Virology Laboratory | Alaska State Virology Laboratory                                                             | Stephanie DeRonde, Elva House, Lisa Smith, Ph.D., Jack Chen, Ph.D.                                                                                                                                                                                                                                                                                                                                                                 |
| hCoV-19/USA/AK-PHL7998/2021          | EPI_ISL_1653904 | 4/7/2021        | Alaska State Virology Laboratory | Alaska State Virology Laboratory                                                             | Stephanie DeRonde, Elva House, Lisa Smith, Ph.D., Jack Chen, Ph.D.                                                                                                                                                                                                                                                                                                                                                                 |
| hCoV-19/USA/AK-PHL8000/2021          | EPI_ISL_1653906 | 4/7/2021        | Alaska State Virology Laboratory | Alaska State Virology Laboratory                                                             | Stephanie DeRonde, Elva House, Lisa Smith, Ph.D., Jack Chen, Ph.D.                                                                                                                                                                                                                                                                                                                                                                 |
| hCoV-19/USA/AK-PHL8001/2021          | EPI_ISL_1653907 | 4/7/2021        | Alaska State Virology Laboratory | Alaska State Virology Laboratory                                                             | Stephanie DeRonde, Elva House, Lisa Smith, Ph.D., Jack Chen, Ph.D.                                                                                                                                                                                                                                                                                                                                                                 |
| hCoV-19/USA/AK-PHL8002/2021          | EPI_ISL_1653908 | 4/7/2021        | Alaska State Virology Laboratory | Alaska State Virology Laboratory                                                             | Stephanie DeRonde, Elva House, Lisa Smith, Ph.D., Jack Chen, Ph.D.                                                                                                                                                                                                                                                                                                                                                                 |
| hCoV-19/USA/AK-PHL8003/2021          | EPI_ISL_1653909 | 4/7/2021        | Alaska State Virology Laboratory | Alaska State Virology Laboratory                                                             | Stephanie DeRonde, Elva House, Lisa Smith, Ph.D., Jack Chen, Ph.D.                                                                                                                                                                                                                                                                                                                                                                 |
| hCoV-19/USA/AK-PHL8004/2021          | EPI_ISL_1653910 | 4/7/2021        | Alaska State Virology Laboratory | Alaska State Virology Laboratory                                                             | Stephanie DeRonde, Elva House, Lisa Smith, Ph.D., Jack Chen, Ph.D.                                                                                                                                                                                                                                                                                                                                                                 |
| hCoV-19/USA/AK-PHL8005/2021          | EPI_ISL_1653911 | 4/7/2021        | Alaska State Virology Laboratory | Alaska State Virology Laboratory                                                             | Stephanie DeRonde, Elva House, Lisa Smith, Ph.D., Jack Chen, Ph.D.                                                                                                                                                                                                                                                                                                                                                                 |
| hCoV-19/USA/AK-PHL8006/2021          | EPI_ISL_1653912 | 4/6/2021        | Alaska State Virology Laboratory | Alaska State Virology Laboratory                                                             | Stephanie DeRonde, Elva House, Lisa Smith, Ph.D., Jack Chen, Ph.D.                                                                                                                                                                                                                                                                                                                                                                 |
| hCoV-19/USA/AK-PHL8007/2021          | EPI_ISL_1653913 | 4/5/2021        | Alaska State Virology Laboratory | Alaska State Virology Laboratory                                                             | Stephanie DeRonde, Elva House, Lisa Smith, Ph.D., Jack Chen, Ph.D.                                                                                                                                                                                                                                                                                                                                                                 |

|                                      |                 |           |                                  |                                                                                              |                                                                                                                                                                                                                                                                                                                                                                                                                                      |
|--------------------------------------|-----------------|-----------|----------------------------------|----------------------------------------------------------------------------------------------|--------------------------------------------------------------------------------------------------------------------------------------------------------------------------------------------------------------------------------------------------------------------------------------------------------------------------------------------------------------------------------------------------------------------------------------|
| hCoV-19/USA/AK-PHL8008/2021          | EPI_ISL_1653914 | 4/6/2021  | Alaska State Virology Laboratory | Alaska State Virology Laboratory                                                             | Stephanie DeRonde, Elva House, Lisa Smith, Ph.D., Jack Chen, Ph.D.                                                                                                                                                                                                                                                                                                                                                                   |
| hCoV-19/USA/AK-PHL8009/2021          | EPI_ISL_1653915 | 4/6/2021  | Alaska State Virology Laboratory | Alaska State Virology Laboratory                                                             | Stephanie DeRonde, Elva House, Lisa Smith, Ph.D., Jack Chen, Ph.D.                                                                                                                                                                                                                                                                                                                                                                   |
| hCoV-19/USA/AK-PHL8010/2021          | EPI_ISL_1653916 | 4/6/2021  | Alaska State Virology Laboratory | Alaska State Virology Laboratory                                                             | Stephanie DeRonde, Elva House, Lisa Smith, Ph.D., Jack Chen, Ph.D.                                                                                                                                                                                                                                                                                                                                                                   |
| hCoV-19/USA/AK-PHL8011/2021          | EPI_ISL_1653917 | 4/6/2021  | Alaska State Virology Laboratory | Alaska State Virology Laboratory                                                             | Stephanie DeRonde, Elva House, Lisa Smith, Ph.D., Jack Chen, Ph.D.                                                                                                                                                                                                                                                                                                                                                                   |
| hCoV-19/USA/AK-PHL8012/2021          | EPI_ISL_1653918 | 4/6/2021  | Alaska State Virology Laboratory | Alaska State Virology Laboratory                                                             | Stephanie DeRonde, Elva House, Lisa Smith, Ph.D., Jack Chen, Ph.D.                                                                                                                                                                                                                                                                                                                                                                   |
| hCoV-19/USA/AK-PHL8013/2021          | EPI_ISL_1653919 | 4/6/2021  | Alaska State Virology Laboratory | Alaska State Virology Laboratory                                                             | Stephanie DeRonde, Elva House, Lisa Smith, Ph.D., Jack Chen, Ph.D.                                                                                                                                                                                                                                                                                                                                                                   |
| hCoV-19/USA/AK-PHL7261/2021          | EPI_ISL_1182706 | 2/18/2021 | Alaska State Virology Laboratory | Alaska State Virology Laboratory                                                             | Stephanie DeRonde, Lisa Smith, Ph.D., Jack Chen, Ph.D.                                                                                                                                                                                                                                                                                                                                                                               |
| hCoV-19/USA/AK-PHL7250/2021          | EPI_ISL_1182711 | 2/17/2021 | Alaska State Virology Laboratory | Alaska State Virology Laboratory                                                             | Stephanie DeRonde, Lisa Smith, Ph.D., Jack Chen, Ph.D.                                                                                                                                                                                                                                                                                                                                                                               |
| hCoV-19/USA/AK-PHL7256/2021          | EPI_ISL_1182712 | 2/17/2021 | Alaska State Virology Laboratory | Alaska State Virology Laboratory                                                             | Stephanie DeRonde, Lisa Smith, Ph.D., Jack Chen, Ph.D.                                                                                                                                                                                                                                                                                                                                                                               |
| hCoV-19/USA/AK-PHL7252/2021          | EPI_ISL_1182731 | 2/16/2021 | Alaska State Virology Laboratory | Alaska State Virology Laboratory                                                             | Stephanie DeRonde, Lisa Smith, Ph.D., Jack Chen, Ph.D.                                                                                                                                                                                                                                                                                                                                                                               |
| hCoV-19/USA/AK-PHL7287/2021          | EPI_ISL_1182751 | 2/21/2021 | Alaska State Virology Laboratory | Alaska State Virology Laboratory                                                             | Stephanie DeRonde, Lisa Smith, Ph.D., Jack Chen, Ph.D.                                                                                                                                                                                                                                                                                                                                                                               |
| hCoV-19/USA/AK-PHL7296/2021          | EPI_ISL_1182754 | 2/21/2021 | Alaska State Virology Laboratory | Alaska State Virology Laboratory                                                             | Stephanie DeRonde, Lisa Smith, Ph.D., Jack Chen, Ph.D.                                                                                                                                                                                                                                                                                                                                                                               |
| hCoV-19/USA/AK-PHL7146/2021          | EPI_ISL_1182786 | 2/15/2021 | Alaska State Virology Laboratory | Alaska State Virology Laboratory                                                             | Stephanie DeRonde, Lisa Smith, Ph.D., Jack Chen, Ph.D.                                                                                                                                                                                                                                                                                                                                                                               |
| hCoV-19/USA/AK-PHL7148/2021          | EPI_ISL_1182788 | 2/15/2021 | Alaska State Virology Laboratory | Alaska State Virology Laboratory                                                             | Stephanie DeRonde, Lisa Smith, Ph.D., Jack Chen, Ph.D.                                                                                                                                                                                                                                                                                                                                                                               |
| hCoV-19/USA/AK-PHL7169/2021          | EPI_ISL_1182806 | 2/15/2021 | Alaska State Virology Laboratory | Alaska State Virology Laboratory                                                             | Stephanie DeRonde, Lisa Smith, Ph.D., Jack Chen, Ph.D.                                                                                                                                                                                                                                                                                                                                                                               |
| hCoV-19/USA/AK-CDC-ASC210039224/2021 | EPI_ISL_1668068 | 3/31/2021 | Aegis Sciences Corporation       | Centers for Disease Control and Prevention<br>Division of Viral Diseases, Pathogen Discovery | Dakota Howard, Dhvani Batra, Peter W. Cook, Kara Moser, Adrian Paskey, Jason Caravas, Benjamin Rambo-Martin, Shatavia Morrison, Christopher Gulvick, Scott Sammons, Yvette Unoarumhi, Darlene Wagner, Matthew Schmeurer, Cyndi Clark, Patrick Campbell, Rob Case, Vikramsinha Ghorpade, Holly Houdeshell, Ola Kvalvaag, Dillon Nall, Ethan Sanders, Alec Vest, Shaun Westlund, Matthew Hardison, Clinton R. Paden, Duncan MacCannell |
| hCoV-19/USA/AK-CDC-ASC210039226/2021 | EPI_ISL_1668069 | 3/31/2021 | Aegis Sciences Corporation       | Centers for Disease Control and Prevention<br>Division of Viral Diseases, Pathogen Discovery | Dakota Howard, Dhvani Batra, Peter W. Cook, Kara Moser, Adrian Paskey, Jason Caravas, Benjamin Rambo-Martin, Shatavia Morrison, Christopher Gulvick, Scott Sammons, Yvette Unoarumhi, Darlene Wagner, Matthew Schmeurer, Cyndi Clark, Patrick Campbell, Rob Case, Vikramsinha Ghorpade, Holly Houdeshell, Ola Kvalvaag, Dillon Nall, Ethan Sanders, Alec Vest, Shaun Westlund, Matthew Hardison, Clinton R. Paden, Duncan MacCannell |
| hCoV-19/USA/AK-CDC-ASC210039229/2021 | EPI_ISL_1668072 | 3/30/2021 | Aegis Sciences Corporation       | Centers for Disease Control and Prevention<br>Division of Viral Diseases, Pathogen Discovery | Dakota Howard, Dhvani Batra, Peter W. Cook, Kara Moser, Adrian Paskey, Jason Caravas, Benjamin Rambo-Martin, Shatavia Morrison, Christopher Gulvick, Scott Sammons, Yvette Unoarumhi, Darlene Wagner, Matthew Schmeurer, Cyndi Clark, Patrick Campbell, Rob Case, Vikramsinha Ghorpade, Holly Houdeshell, Ola Kvalvaag, Dillon Nall, Ethan Sanders, Alec Vest, Shaun Westlund, Matthew Hardison, Clinton R. Paden, Duncan MacCannell |
| hCoV-19/USA/AK-PHL7864/2021          | EPI_ISL_1675099 | 4/2/2021  | Alaska State Virology Laboratory | Alaska State Virology Laboratory                                                             | Stephanie DeRonde, Elva House, Lisa Smith, Ph.D., Jack Chen, Ph.D.                                                                                                                                                                                                                                                                                                                                                                   |
| hCoV-19/USA/AK-PHL7865/2021          | EPI_ISL_1675100 | 4/2/2021  | Alaska State Virology Laboratory | Alaska State Virology Laboratory                                                             | Stephanie DeRonde, Elva House, Lisa Smith, Ph.D., Jack Chen, Ph.D.                                                                                                                                                                                                                                                                                                                                                                   |
| hCoV-19/USA/AK-PHL7866/2021          | EPI_ISL_1675101 | 3/31/2021 | Alaska State Virology Laboratory | Alaska State Virology Laboratory                                                             | Stephanie DeRonde, Elva House, Lisa Smith, Ph.D., Jack Chen, Ph.D.                                                                                                                                                                                                                                                                                                                                                                   |
| hCoV-19/USA/AK-PHL7868/2021          | EPI_ISL_1675102 | 3/29/2021 | Alaska State Virology Laboratory | Alaska State Virology Laboratory                                                             | Stephanie DeRonde, Elva House, Lisa Smith, Ph.D., Jack Chen, Ph.D.                                                                                                                                                                                                                                                                                                                                                                   |
| hCoV-19/USA/AK-PHL7862/2021          | EPI_ISL_1675097 | 4/2/2021  | Alaska State Virology Laboratory | Alaska State Virology Laboratory                                                             | Stephanie DeRonde, Elva House, Lisa Smith, Ph.D., Jack Chen, Ph.D.                                                                                                                                                                                                                                                                                                                                                                   |
| hCoV-19/USA/AK-PHL7863/2021          | EPI_ISL_1675098 | 4/1/2021  | Alaska State Virology Laboratory | Alaska State Virology Laboratory                                                             | Stephanie DeRonde, Elva House, Lisa Smith, Ph.D., Jack Chen, Ph.D.                                                                                                                                                                                                                                                                                                                                                                   |
| hCoV-19/USA/AK-PHL7870/2021          | EPI_ISL_1675103 | 3/31/2021 | Alaska State Virology Laboratory | Alaska State Virology Laboratory                                                             | Stephanie DeRonde, Elva House, Lisa Smith, Ph.D., Jack Chen, Ph.D.                                                                                                                                                                                                                                                                                                                                                                   |
| hCoV-19/USA/AK-PHL7872/2021          | EPI_ISL_1675105 | 3/29/2021 | Alaska State Virology Laboratory | Alaska State Virology Laboratory                                                             | Stephanie DeRonde, Elva House, Lisa Smith, Ph.D., Jack Chen, Ph.D.                                                                                                                                                                                                                                                                                                                                                                   |
| hCoV-19/USA/AK-PHL7873/2021          | EPI_ISL_1675106 | 3/30/2021 | Alaska State Virology Laboratory | Alaska State Virology Laboratory                                                             | Stephanie DeRonde, Elva House, Lisa Smith, Ph.D., Jack Chen, Ph.D.                                                                                                                                                                                                                                                                                                                                                                   |
| hCoV-19/USA/AK-PHL7874/2021          | EPI_ISL_1675107 | 3/29/2021 | Alaska State Virology Laboratory | Alaska State Virology Laboratory                                                             | Stephanie DeRonde, Elva House, Lisa Smith, Ph.D., Jack Chen, Ph.D.                                                                                                                                                                                                                                                                                                                                                                   |
| hCoV-19/USA/AK-PHL7875/2021          | EPI_ISL_1675108 | 3/28/2021 | Alaska State Virology Laboratory | Alaska State Virology Laboratory                                                             | Stephanie DeRonde, Elva House, Lisa Smith, Ph.D., Jack Chen, Ph.D.                                                                                                                                                                                                                                                                                                                                                                   |
| hCoV-19/USA/AK-PHL7877/2021          | EPI_ISL_1675110 | 3/29/2021 | Alaska State Virology Laboratory | Alaska State Virology Laboratory                                                             | Stephanie DeRonde, Elva House, Lisa Smith, Ph.D., Jack Chen, Ph.D.                                                                                                                                                                                                                                                                                                                                                                   |
| hCoV-19/USA/AK-PHL7878/2021          | EPI_ISL_1675111 | 3/29/2021 | Alaska State Virology Laboratory | Alaska State Virology Laboratory                                                             | Stephanie DeRonde, Elva House, Lisa Smith, Ph.D., Jack Chen, Ph.D.                                                                                                                                                                                                                                                                                                                                                                   |
| hCoV-19/USA/AK-PHL7880/2021          | EPI_ISL_1675112 | 3/30/2021 | Alaska State Virology Laboratory | Alaska State Virology Laboratory                                                             | Stephanie DeRonde, Elva House, Lisa Smith, Ph.D., Jack Chen, Ph.D.                                                                                                                                                                                                                                                                                                                                                                   |
| hCoV-19/USA/AK-PHL7881/2021          | EPI_ISL_1675113 | 3/29/2021 | Alaska State Virology Laboratory | Alaska State Virology Laboratory                                                             | Stephanie DeRonde, Elva House, Lisa Smith, Ph.D., Jack Chen, Ph.D.                                                                                                                                                                                                                                                                                                                                                                   |
| hCoV-19/USA/AK-PHL7882/2021          | EPI_ISL_1675114 | 4/3/2021  | Alaska State Virology Laboratory | Alaska State Virology Laboratory                                                             | Stephanie DeRonde, Elva House, Lisa Smith, Ph.D., Jack Chen, Ph.D.                                                                                                                                                                                                                                                                                                                                                                   |
| hCoV-19/USA/AK-PHL7886/2021          | EPI_ISL_1675116 | 3/31/2021 | Alaska State Virology Laboratory | Alaska State Virology Laboratory                                                             | Stephanie DeRonde, Elva House, Lisa Smith, Ph.D., Jack Chen, Ph.D.                                                                                                                                                                                                                                                                                                                                                                   |
| hCoV-19/USA/AK-PHL7888/2021          | EPI_ISL_1675117 | 4/2/2021  | Alaska State Virology Laboratory | Alaska State Virology Laboratory                                                             | Stephanie DeRonde, Elva House, Lisa Smith, Ph.D., Jack Chen, Ph.D.                                                                                                                                                                                                                                                                                                                                                                   |
| hCoV-19/USA/AK-PHL7889/2021          | EPI_ISL_1675118 | 4/2/2021  | Alaska State Virology Laboratory | Alaska State Virology Laboratory                                                             | Stephanie DeRonde, Elva House, Lisa Smith, Ph.D., Jack Chen, Ph.D.                                                                                                                                                                                                                                                                                                                                                                   |

|                                      |                 |           |                                   |                                                                                              |                                                                                                                                                                                                                                                                                                                                                                                                                                                                                                                                                                                                                                                                                                                                                                                                                                                                                                                                                                                                                                                 |
|--------------------------------------|-----------------|-----------|-----------------------------------|----------------------------------------------------------------------------------------------|-------------------------------------------------------------------------------------------------------------------------------------------------------------------------------------------------------------------------------------------------------------------------------------------------------------------------------------------------------------------------------------------------------------------------------------------------------------------------------------------------------------------------------------------------------------------------------------------------------------------------------------------------------------------------------------------------------------------------------------------------------------------------------------------------------------------------------------------------------------------------------------------------------------------------------------------------------------------------------------------------------------------------------------------------|
| hCoV-19/USA/AK-PHL7890/2021          | EPI_ISL_1675119 | 4/2/2021  | Alaska State Virology Laboratory  | Alaska State Virology Laboratory                                                             | Stephanie DeRonde, Elva House, Lisa Smith, Ph.D., Jack Chen, Ph.D.                                                                                                                                                                                                                                                                                                                                                                                                                                                                                                                                                                                                                                                                                                                                                                                                                                                                                                                                                                              |
| hCoV-19/USA/AK-PHL7891/2021          | EPI_ISL_1675120 | 4/2/2021  | Alaska State Virology Laboratory  | Alaska State Virology Laboratory                                                             | Stephanie DeRonde, Elva House, Lisa Smith, Ph.D., Jack Chen, Ph.D.                                                                                                                                                                                                                                                                                                                                                                                                                                                                                                                                                                                                                                                                                                                                                                                                                                                                                                                                                                              |
| hCoV-19/USA/AK-PHL7892/2021          | EPI_ISL_1675121 | 4/3/2021  | Alaska State Virology Laboratory  | Alaska State Virology Laboratory                                                             | Stephanie DeRonde, Elva House, Lisa Smith, Ph.D., Jack Chen, Ph.D.                                                                                                                                                                                                                                                                                                                                                                                                                                                                                                                                                                                                                                                                                                                                                                                                                                                                                                                                                                              |
| hCoV-19/USA/AK-PHL7893/2021          | EPI_ISL_1675122 | 4/3/2021  | Alaska State Virology Laboratory  | Alaska State Virology Laboratory                                                             | Stephanie DeRonde, Elva House, Lisa Smith, Ph.D., Jack Chen, Ph.D.                                                                                                                                                                                                                                                                                                                                                                                                                                                                                                                                                                                                                                                                                                                                                                                                                                                                                                                                                                              |
| hCoV-19/USA/AK-PHL7894/2021          | EPI_ISL_1675123 | 4/3/2021  | Alaska State Virology Laboratory  | Alaska State Virology Laboratory                                                             | Stephanie DeRonde, Elva House, Lisa Smith, Ph.D., Jack Chen, Ph.D.                                                                                                                                                                                                                                                                                                                                                                                                                                                                                                                                                                                                                                                                                                                                                                                                                                                                                                                                                                              |
| hCoV-19/USA/AK-PHL7895/2021          | EPI_ISL_1675124 | 3/31/2021 | Alaska State Virology Laboratory  | Alaska State Virology Laboratory                                                             | Stephanie DeRonde, Elva House, Lisa Smith, Ph.D., Jack Chen, Ph.D.                                                                                                                                                                                                                                                                                                                                                                                                                                                                                                                                                                                                                                                                                                                                                                                                                                                                                                                                                                              |
| hCoV-19/USA/AK-PHL7896/2021          | EPI_ISL_1675125 | 3/30/2021 | Alaska State Virology Laboratory  | Alaska State Virology Laboratory                                                             | Stephanie DeRonde, Elva House, Lisa Smith, Ph.D., Jack Chen, Ph.D.                                                                                                                                                                                                                                                                                                                                                                                                                                                                                                                                                                                                                                                                                                                                                                                                                                                                                                                                                                              |
| hCoV-19/USA/AK-PHL7898/2021          | EPI_ISL_1675126 | 3/29/2021 | Alaska State Virology Laboratory  | Alaska State Virology Laboratory                                                             | Stephanie DeRonde, Elva House, Lisa Smith, Ph.D., Jack Chen, Ph.D.                                                                                                                                                                                                                                                                                                                                                                                                                                                                                                                                                                                                                                                                                                                                                                                                                                                                                                                                                                              |
| hCoV-19/USA/AK-PHL7900/2021          | EPI_ISL_1675128 | 3/26/2021 | Alaska State Virology Laboratory  | Alaska State Virology Laboratory                                                             | Stephanie DeRonde, Elva House, Lisa Smith, Ph.D., Jack Chen, Ph.D.                                                                                                                                                                                                                                                                                                                                                                                                                                                                                                                                                                                                                                                                                                                                                                                                                                                                                                                                                                              |
| hCoV-19/USA/AK-PHL7901/2021          | EPI_ISL_1675129 | 4/1/2021  | Alaska State Virology Laboratory  | Alaska State Virology Laboratory                                                             | Stephanie DeRonde, Elva House, Lisa Smith, Ph.D., Jack Chen, Ph.D.                                                                                                                                                                                                                                                                                                                                                                                                                                                                                                                                                                                                                                                                                                                                                                                                                                                                                                                                                                              |
| hCoV-19/USA/AK-PHL7903/2021          | EPI_ISL_1675130 | 4/5/2021  | Alaska State Virology Laboratory  | Alaska State Virology Laboratory                                                             | Stephanie DeRonde, Elva House, Lisa Smith, Ph.D., Jack Chen, Ph.D.                                                                                                                                                                                                                                                                                                                                                                                                                                                                                                                                                                                                                                                                                                                                                                                                                                                                                                                                                                              |
| hCoV-19/USA/AK-PHL7904/2021          | EPI_ISL_1675131 | 3/28/2021 | Alaska State Virology Laboratory  | Alaska State Virology Laboratory                                                             | Stephanie DeRonde, Elva House, Lisa Smith, Ph.D., Jack Chen, Ph.D.                                                                                                                                                                                                                                                                                                                                                                                                                                                                                                                                                                                                                                                                                                                                                                                                                                                                                                                                                                              |
| hCoV-19/USA/AK-PHL7179/2021          | EPI_ISL_1195913 | 2/15/2021 | Alaska State Virology Laboratory  | Alaska State Virology Laboratory                                                             | Stephanie DeRonde, Elva House, Lisa Smith, Ph.D., Jack Chen, Ph.D.                                                                                                                                                                                                                                                                                                                                                                                                                                                                                                                                                                                                                                                                                                                                                                                                                                                                                                                                                                              |
| hCoV-19/USA/AK-PHL7183/2021          | EPI_ISL_1195916 | 2/15/2021 | Alaska State Virology Laboratory  | Alaska State Virology Laboratory                                                             | Stephanie DeRonde, Elva House, Lisa Smith, Ph.D., Jack Chen, Ph.D.                                                                                                                                                                                                                                                                                                                                                                                                                                                                                                                                                                                                                                                                                                                                                                                                                                                                                                                                                                              |
| hCoV-19/USA/AK-PHL7191/2021          | EPI_ISL_1195924 | 2/15/2021 | Alaska State Virology Laboratory  | Alaska State Virology Laboratory                                                             | Stephanie DeRonde, Elva House, Lisa Smith, Ph.D., Jack Chen, Ph.D.                                                                                                                                                                                                                                                                                                                                                                                                                                                                                                                                                                                                                                                                                                                                                                                                                                                                                                                                                                              |
| hCoV-19/USA/AK-PHL7200/2021          | EPI_ISL_1195925 | 2/16/2021 | Alaska State Virology Laboratory  | Alaska State Virology Laboratory                                                             | Stephanie DeRonde, Elva House, Lisa Smith, Ph.D., Jack Chen, Ph.D.                                                                                                                                                                                                                                                                                                                                                                                                                                                                                                                                                                                                                                                                                                                                                                                                                                                                                                                                                                              |
| hCoV-19/USA/AK-PHL7203/2021          | EPI_ISL_1195928 | 2/16/2021 | Alaska State Virology Laboratory  | Alaska State Virology Laboratory                                                             | Stephanie DeRonde, Elva House, Lisa Smith, Ph.D., Jack Chen, Ph.D.                                                                                                                                                                                                                                                                                                                                                                                                                                                                                                                                                                                                                                                                                                                                                                                                                                                                                                                                                                              |
| hCoV-19/USA/AK-PHL7205/2021          | EPI_ISL_1195930 | 2/16/2021 | Alaska State Virology Laboratory  | Alaska State Virology Laboratory                                                             | Stephanie DeRonde, Elva House, Lisa Smith, Ph.D., Jack Chen, Ph.D.                                                                                                                                                                                                                                                                                                                                                                                                                                                                                                                                                                                                                                                                                                                                                                                                                                                                                                                                                                              |
| hCoV-19/USA/AK-PHL7319/2021          | EPI_ISL_1195966 | 2/16/2021 | Alaska State Virology Laboratory  | Alaska State Virology Laboratory                                                             | Stephanie DeRonde, Elva House, Lisa Smith, Ph.D., Jack Chen, Ph.D.                                                                                                                                                                                                                                                                                                                                                                                                                                                                                                                                                                                                                                                                                                                                                                                                                                                                                                                                                                              |
| hCoV-19/USA/AK-PHL7320/2021          | EPI_ISL_1195967 | 2/15/2021 | Alaska State Virology Laboratory  | Alaska State Virology Laboratory                                                             | Stephanie DeRonde, Elva House, Lisa Smith, Ph.D., Jack Chen, Ph.D.                                                                                                                                                                                                                                                                                                                                                                                                                                                                                                                                                                                                                                                                                                                                                                                                                                                                                                                                                                              |
| hCoV-19/USA/AK-PHL7323/2021          | EPI_ISL_1195970 | 2/18/2021 | Alaska State Virology Laboratory  | Alaska State Virology Laboratory                                                             | Stephanie DeRonde, Elva House, Lisa Smith, Ph.D., Jack Chen, Ph.D.                                                                                                                                                                                                                                                                                                                                                                                                                                                                                                                                                                                                                                                                                                                                                                                                                                                                                                                                                                              |
| hCoV-19/USA/AK-PHL7348/2021          | EPI_ISL_1195989 | 2/20/2021 | Alaska State Virology Laboratory  | Alaska State Virology Laboratory                                                             | Stephanie DeRonde, Elva House, Lisa Smith, Ph.D., Jack Chen, Ph.D.                                                                                                                                                                                                                                                                                                                                                                                                                                                                                                                                                                                                                                                                                                                                                                                                                                                                                                                                                                              |
| hCoV-19/USA/AK-CDC-LC0042932/2021    | EPI_ISL_1683846 | 4/6/2021  | Laboratory Corporation of America | Centers for Disease Control and Prevention<br>Division of Viral Diseases, Pathogen Discovery | Dakota Howard, Dhvani Batra, Peter W. Cook, Kara Moser, Adrian Paskey, Jason Caravas, Benjamin Rambo-Martin, Shatavia Morrison, Christopher Gulvick, Scott Sammons, Yvette Unoarumhi, Darlene Wagner, Matthew Schmerer, Mino Agarwal, Eyad Almasri, Debbie Boles, Ayla Burns, Nuthawin Charoensri, Oren Cohen, Susan Countryman, Mary Ann Cristobal, Bobbi Croy, Suzanne Dale, Hrushikesh Deshmukh, Amanda Douglas, Vincent Drouillon, Marcia Eisenberg, Howard Engler, Rama Ghatti, Prashant Gupta, Susan Hicks, Jake Humphrey, Lax Iyer, Manoj Jain, Mohan Kolli, Brian Krueger, Tim Kuphal, Stanley Letovsky, Michael Levandoski, Craig Lukasik, Jonathan Meltzer, Brian Norvell, Mindy Nye, Scott Parker, Christos Petropoulos, John Pruitt, Steven Ragan, Scott Ryan, Mike Sapeta, Jana Schroth, Suresh Babu Selvaraju, Goran Stevovic, Amanda Suchanek, Andrea Throop, Lyndon Tilson, Thomas Urban, Joe Voshell, Kimberly Wagner, Jonathan Williams, Mary Williamson, Qian Zeng, Tricia Zwiefelhofer, Clinton R. Paden, Duncan MacCannell |
| hCoV-19/USA/AK-CDC-ASC210028278/2021 | EPI_ISL_1688223 | 3/28/2021 | Aegis Sciences Corporation        | Centers for Disease Control and Prevention<br>Division of Viral Diseases, Pathogen Discovery | Dakota Howard, Dhvani Batra, Peter W. Cook, Kara Moser, Adrian Paskey, Jason Caravas, Benjamin Rambo-Martin, Shatavia Morrison, Christopher Gulvick, Scott Sammons, Yvette Unoarumhi, Darlene Wagner, Matthew Schmerer, Cyndi Clark, Patrick Campbell, Rob Case, Vikramsinha Ghorpade, Holly Houdeshell, Ola Kvalvaag, Dillon Nail, Ethan Sanders, Alec Vest, Shaun Westlund, Matthew Hardison, Clinton R. Paden, Duncan MacCannell                                                                                                                                                                                                                                                                                                                                                                                                                                                                                                                                                                                                             |
| hCoV-19/USA/AK-PHL7861/2021          | EPI_ISL_1675096 | 4/1/2021  | Alaska State Virology Laboratory  | Alaska State Virology Laboratory                                                             | Stephanie DeRonde, Elva House, Lisa Smith, Ph.D., Jack Chen, Ph.D.                                                                                                                                                                                                                                                                                                                                                                                                                                                                                                                                                                                                                                                                                                                                                                                                                                                                                                                                                                              |
| hCoV-19/USA/AK-PHL7871/2021          | EPI_ISL_1675104 | 4/1/2021  | Alaska State Virology Laboratory  | Alaska State Virology Laboratory                                                             | Stephanie DeRonde, Elva House, Lisa Smith, Ph.D., Jack Chen, Ph.D.                                                                                                                                                                                                                                                                                                                                                                                                                                                                                                                                                                                                                                                                                                                                                                                                                                                                                                                                                                              |
| hCoV-19/USA/AK-PHL7876/2021          | EPI_ISL_1675109 | 3/29/2021 | Alaska State Virology Laboratory  | Alaska State Virology Laboratory                                                             | Stephanie DeRonde, Elva House, Lisa Smith, Ph.D., Jack Chen, Ph.D.                                                                                                                                                                                                                                                                                                                                                                                                                                                                                                                                                                                                                                                                                                                                                                                                                                                                                                                                                                              |
| hCoV-19/USA/AK-PHL7885/2021          | EPI_ISL_1675115 | 3/31/2021 | Alaska State Virology Laboratory  | Alaska State Virology Laboratory                                                             | Stephanie DeRonde, Elva House, Lisa Smith, Ph.D., Jack Chen, Ph.D.                                                                                                                                                                                                                                                                                                                                                                                                                                                                                                                                                                                                                                                                                                                                                                                                                                                                                                                                                                              |
| hCoV-19/USA/AK-PHL7899/2021          | EPI_ISL_1675127 | 4/5/2021  | Alaska State Virology Laboratory  | Alaska State Virology Laboratory                                                             | Stephanie DeRonde, Elva House, Lisa Smith, Ph.D., Jack Chen, Ph.D.                                                                                                                                                                                                                                                                                                                                                                                                                                                                                                                                                                                                                                                                                                                                                                                                                                                                                                                                                                              |
| hCoV-19/USA/AK-PHL8014/2021          | EPI_ISL_1701683 | 4/5/2021  | Alaska State Virology Laboratory  | Alaska State Virology Laboratory                                                             | Stephanie DeRonde, Elva House, Lisa Smith, Ph.D., Jack Chen, Ph.D.                                                                                                                                                                                                                                                                                                                                                                                                                                                                                                                                                                                                                                                                                                                                                                                                                                                                                                                                                                              |
| hCoV-19/USA/AK-PHL8019/2021          | EPI_ISL_1701685 | 4/5/2021  | Alaska State Virology Laboratory  | Alaska State Virology Laboratory                                                             | Stephanie DeRonde, Elva House, Lisa Smith, Ph.D., Jack Chen, Ph.D.                                                                                                                                                                                                                                                                                                                                                                                                                                                                                                                                                                                                                                                                                                                                                                                                                                                                                                                                                                              |
| hCoV-19/USA/AK-PHL8021/2021          | EPI_ISL_1701687 | 4/5/2021  | Alaska State Virology Laboratory  | Alaska State Virology Laboratory                                                             | Stephanie DeRonde, Elva House, Lisa Smith, Ph.D., Jack Chen, Ph.D.                                                                                                                                                                                                                                                                                                                                                                                                                                                                                                                                                                                                                                                                                                                                                                                                                                                                                                                                                                              |
| hCoV-19/USA/AK-PHL8023/2021          | EPI_ISL_1701689 | 4/6/2021  | Alaska State Virology Laboratory  | Alaska State Virology Laboratory                                                             | Stephanie DeRonde, Elva House, Lisa Smith, Ph.D., Jack Chen, Ph.D.                                                                                                                                                                                                                                                                                                                                                                                                                                                                                                                                                                                                                                                                                                                                                                                                                                                                                                                                                                              |
| hCoV-19/USA/AK-PHL8030/2021          | EPI_ISL_1701692 | 4/7/2021  | Alaska State Virology Laboratory  | Alaska State Virology Laboratory                                                             | Stephanie DeRonde, Elva House, Lisa Smith, Ph.D., Jack Chen, Ph.D.                                                                                                                                                                                                                                                                                                                                                                                                                                                                                                                                                                                                                                                                                                                                                                                                                                                                                                                                                                              |
| hCoV-19/USA/AK-PHL8032/2021          | EPI_ISL_1701693 | 3/7/2021  | Alaska State Virology Laboratory  | Alaska State Virology Laboratory                                                             | Stephanie DeRonde, Elva House, Lisa Smith, Ph.D., Jack Chen, Ph.D.                                                                                                                                                                                                                                                                                                                                                                                                                                                                                                                                                                                                                                                                                                                                                                                                                                                                                                                                                                              |





|                                         |                 |           |                                   |                                                                                              |                                                                                                                                                                                                                                                                                                                                                                                                                                                                                                                                                                                                                                                                                                                                                                                                                                                                                                                                                                                                                                                   |
|-----------------------------------------|-----------------|-----------|-----------------------------------|----------------------------------------------------------------------------------------------|---------------------------------------------------------------------------------------------------------------------------------------------------------------------------------------------------------------------------------------------------------------------------------------------------------------------------------------------------------------------------------------------------------------------------------------------------------------------------------------------------------------------------------------------------------------------------------------------------------------------------------------------------------------------------------------------------------------------------------------------------------------------------------------------------------------------------------------------------------------------------------------------------------------------------------------------------------------------------------------------------------------------------------------------------|
| hCoV-19/USA/AK-PHL8217/2021             | EPI_ISL_1789645 | 4/14/2021 | Alaska State Virology Laboratory  | Alaska State Virology Laboratory                                                             | Stephanie DeRonde, Elva House, Lisa Smith, Ph.D., Jack Chen, Ph.D.                                                                                                                                                                                                                                                                                                                                                                                                                                                                                                                                                                                                                                                                                                                                                                                                                                                                                                                                                                                |
| hCoV-19/USA/AK-PHL8218/2021             | EPI_ISL_1789646 | 4/13/2021 | Alaska State Virology Laboratory  | Alaska State Virology Laboratory                                                             | Stephanie DeRonde, Elva House, Lisa Smith, Ph.D., Jack Chen, Ph.D.                                                                                                                                                                                                                                                                                                                                                                                                                                                                                                                                                                                                                                                                                                                                                                                                                                                                                                                                                                                |
| hCoV-19/USA/AK-PHL8219/2021             | EPI_ISL_1789647 | 4/13/2021 | Alaska State Virology Laboratory  | Alaska State Virology Laboratory                                                             | Stephanie DeRonde, Elva House, Lisa Smith, Ph.D., Jack Chen, Ph.D.                                                                                                                                                                                                                                                                                                                                                                                                                                                                                                                                                                                                                                                                                                                                                                                                                                                                                                                                                                                |
| hCoV-19/USA/AK-PHL8221/2021             | EPI_ISL_1789649 | 4/16/2021 | Alaska State Virology Laboratory  | Alaska State Virology Laboratory                                                             | Stephanie DeRonde, Elva House, Lisa Smith, Ph.D., Jack Chen, Ph.D.                                                                                                                                                                                                                                                                                                                                                                                                                                                                                                                                                                                                                                                                                                                                                                                                                                                                                                                                                                                |
| hCoV-19/USA/AK-PHL8222/2021             | EPI_ISL_1789650 | 4/15/2021 | Alaska State Virology Laboratory  | Alaska State Virology Laboratory                                                             | Stephanie DeRonde, Elva House, Lisa Smith, Ph.D., Jack Chen, Ph.D.                                                                                                                                                                                                                                                                                                                                                                                                                                                                                                                                                                                                                                                                                                                                                                                                                                                                                                                                                                                |
| hCoV-19/USA/AK-PHL8223/2021             | EPI_ISL_1789651 | 4/19/2021 | Alaska State Virology Laboratory  | Alaska State Virology Laboratory                                                             | Stephanie DeRonde, Elva House, Lisa Smith, Ph.D., Jack Chen, Ph.D.                                                                                                                                                                                                                                                                                                                                                                                                                                                                                                                                                                                                                                                                                                                                                                                                                                                                                                                                                                                |
| hCoV-19/USA/AK-PHL8224/2021             | EPI_ISL_1789652 | 4/17/2021 | Alaska State Virology Laboratory  | Alaska State Virology Laboratory                                                             | Stephanie DeRonde, Elva House, Lisa Smith, Ph.D., Jack Chen, Ph.D.                                                                                                                                                                                                                                                                                                                                                                                                                                                                                                                                                                                                                                                                                                                                                                                                                                                                                                                                                                                |
| hCoV-19/USA/AK-PHL8225/2021             | EPI_ISL_1789653 | 4/14/2021 | Alaska State Virology Laboratory  | Alaska State Virology Laboratory                                                             | Stephanie DeRonde, Elva House, Lisa Smith, Ph.D., Jack Chen, Ph.D.                                                                                                                                                                                                                                                                                                                                                                                                                                                                                                                                                                                                                                                                                                                                                                                                                                                                                                                                                                                |
| hCoV-19/USA/AK-PHL8226/2021             | EPI_ISL_1789654 | 4/15/2021 | Alaska State Virology Laboratory  | Alaska State Virology Laboratory                                                             | Stephanie DeRonde, Elva House, Lisa Smith, Ph.D., Jack Chen, Ph.D.                                                                                                                                                                                                                                                                                                                                                                                                                                                                                                                                                                                                                                                                                                                                                                                                                                                                                                                                                                                |
| hCoV-19/USA/AK-PHL8227/2021             | EPI_ISL_1789655 | 4/15/2021 | Alaska State Virology Laboratory  | Alaska State Virology Laboratory                                                             | Stephanie DeRonde, Elva House, Lisa Smith, Ph.D., Jack Chen, Ph.D.                                                                                                                                                                                                                                                                                                                                                                                                                                                                                                                                                                                                                                                                                                                                                                                                                                                                                                                                                                                |
| hCoV-19/USA/AK-PHL8228/2021             | EPI_ISL_1789657 | 4/19/2021 | Alaska State Virology Laboratory  | Alaska State Virology Laboratory                                                             | Stephanie DeRonde, Elva House, Lisa Smith, Ph.D., Jack Chen, Ph.D.                                                                                                                                                                                                                                                                                                                                                                                                                                                                                                                                                                                                                                                                                                                                                                                                                                                                                                                                                                                |
| hCoV-19/USA/AK-PHL8229/2021             | EPI_ISL_1789658 | 4/19/2021 | Alaska State Virology Laboratory  | Alaska State Virology Laboratory                                                             | Stephanie DeRonde, Elva House, Lisa Smith, Ph.D., Jack Chen, Ph.D.                                                                                                                                                                                                                                                                                                                                                                                                                                                                                                                                                                                                                                                                                                                                                                                                                                                                                                                                                                                |
| hCoV-19/USA/AK-PHL8230/2021             | EPI_ISL_1789659 | 4/19/2021 | Alaska State Virology Laboratory  | Alaska State Virology Laboratory                                                             | Stephanie DeRonde, Elva House, Lisa Smith, Ph.D., Jack Chen, Ph.D.                                                                                                                                                                                                                                                                                                                                                                                                                                                                                                                                                                                                                                                                                                                                                                                                                                                                                                                                                                                |
| hCoV-19/USA/AK-PHL8232/2021             | EPI_ISL_1789661 | 4/19/2021 | Alaska State Virology Laboratory  | Alaska State Virology Laboratory                                                             | Stephanie DeRonde, Elva House, Lisa Smith, Ph.D., Jack Chen, Ph.D.                                                                                                                                                                                                                                                                                                                                                                                                                                                                                                                                                                                                                                                                                                                                                                                                                                                                                                                                                                                |
| hCoV-19/USA/AK-PHL8233/2021             | EPI_ISL_1789662 | 4/19/2021 | Alaska State Virology Laboratory  | Alaska State Virology Laboratory                                                             | Stephanie DeRonde, Elva House, Lisa Smith, Ph.D., Jack Chen, Ph.D.                                                                                                                                                                                                                                                                                                                                                                                                                                                                                                                                                                                                                                                                                                                                                                                                                                                                                                                                                                                |
| hCoV-19/USA/AK-PHL8234/2021             | EPI_ISL_1789663 | 4/19/2021 | Alaska State Virology Laboratory  | Alaska State Virology Laboratory                                                             | Stephanie DeRonde, Elva House, Lisa Smith, Ph.D., Jack Chen, Ph.D.                                                                                                                                                                                                                                                                                                                                                                                                                                                                                                                                                                                                                                                                                                                                                                                                                                                                                                                                                                                |
| hCoV-19/USA/AK-PHL8235/2021             | EPI_ISL_1789664 | 4/19/2021 | Alaska State Virology Laboratory  | Alaska State Virology Laboratory                                                             | Stephanie DeRonde, Elva House, Lisa Smith, Ph.D., Jack Chen, Ph.D.                                                                                                                                                                                                                                                                                                                                                                                                                                                                                                                                                                                                                                                                                                                                                                                                                                                                                                                                                                                |
| hCoV-19/USA/AK-PHL8236/2021             | EPI_ISL_1789665 | 4/19/2021 | Alaska State Virology Laboratory  | Alaska State Virology Laboratory                                                             | Stephanie DeRonde, Elva House, Lisa Smith, Ph.D., Jack Chen, Ph.D.                                                                                                                                                                                                                                                                                                                                                                                                                                                                                                                                                                                                                                                                                                                                                                                                                                                                                                                                                                                |
| hCoV-19/USA/AK-PHL8237/2021             | EPI_ISL_1789666 | 4/19/2021 | Alaska State Virology Laboratory  | Alaska State Virology Laboratory                                                             | Stephanie DeRonde, Elva House, Lisa Smith, Ph.D., Jack Chen, Ph.D.                                                                                                                                                                                                                                                                                                                                                                                                                                                                                                                                                                                                                                                                                                                                                                                                                                                                                                                                                                                |
| hCoV-19/USA/AK-PHL8238/2021             | EPI_ISL_1789667 | 4/19/2021 | Alaska State Virology Laboratory  | Alaska State Virology Laboratory                                                             | Stephanie DeRonde, Elva House, Lisa Smith, Ph.D., Jack Chen, Ph.D.                                                                                                                                                                                                                                                                                                                                                                                                                                                                                                                                                                                                                                                                                                                                                                                                                                                                                                                                                                                |
| hCoV-19/USA/AK-PHL8239/2021             | EPI_ISL_1789668 | 4/19/2021 | Alaska State Virology Laboratory  | Alaska State Virology Laboratory                                                             | Stephanie DeRonde, Elva House, Lisa Smith, Ph.D., Jack Chen, Ph.D.                                                                                                                                                                                                                                                                                                                                                                                                                                                                                                                                                                                                                                                                                                                                                                                                                                                                                                                                                                                |
| hCoV-19/USA/AK-PHL8241/2021             | EPI_ISL_1789669 | 4/19/2021 | Alaska State Virology Laboratory  | Alaska State Virology Laboratory                                                             | Stephanie DeRonde, Elva House, Lisa Smith, Ph.D., Jack Chen, Ph.D.                                                                                                                                                                                                                                                                                                                                                                                                                                                                                                                                                                                                                                                                                                                                                                                                                                                                                                                                                                                |
| hCoV-19/USA/AK-PHL8242/2021             | EPI_ISL_1789670 | 4/19/2021 | Alaska State Virology Laboratory  | Alaska State Virology Laboratory                                                             | Stephanie DeRonde, Elva House, Lisa Smith, Ph.D., Jack Chen, Ph.D.                                                                                                                                                                                                                                                                                                                                                                                                                                                                                                                                                                                                                                                                                                                                                                                                                                                                                                                                                                                |
| hCoV-19/USA/AK-CDC-IBX785023940557/2021 | EPI_ISL_1796050 | 4/6/2021  | Infinity Biologix                 | Centers for Disease Control and Prevention<br>Division of Viral Diseases, Pathogen Discovery | Dakota Howard, Dhvani Batra, Peter W. Cook, Kara Moser, Adrian Paskey, Jason Caravas, Benjamin Rambo-Martin, Shatavia Morrison, Christopher Gulvick, Scott Sammons, Yvette Inoaarumhi, Darlene Wagner, Matthew Schmerer, Christian Bixby, Yihe Wang, Jonathan Schultz, Chirayu Goswami, Russ Hager, Robin Grimwood, Clinton R. Paden, Duncan MacCannell                                                                                                                                                                                                                                                                                                                                                                                                                                                                                                                                                                                                                                                                                           |
| hCoV-19/USA/AK-CDC-LC0044709/2021       | EPI_ISL_1798718 | 4/9/2021  | Laboratory Corporation of America | Centers for Disease Control and Prevention<br>Division of Viral Diseases, Pathogen Discovery | Dakota Howard, Dhvani Batra, Peter W. Cook, Kara Moser, Adrian Paskey, Jason Caravas, Benjamin Rambo-Martin, Shatavia Morrison, Christopher Gulvick, Scott Sammons, Yvette Inoaarumhi, Darlene Wagner, Matthew Schmerer, Minoo Agarwal, Eyad Almasri, Debbie Boles, Ayla Burns, Nuthawin Charoensri, Oren Cohen, Susan Countryman, Mary Ann Cristobal, Bobbi Croy, Suzanne Dale, Hrushikesh Deshmukh, Amanda Douglas, Vincent Drouillon, Marcia Eisenberg, Howard Engler, Rama Ghatti, Prashant Gupta, Susan Hicks, Jake Humphrey, Lax Iyer, Manoj Jain, Mohan Kolli, Brian Krueger, Tim Kuphal, Stanley Letovsky, Michael Levandoski, Craig Lukasik, Jonathan Meltzer, Brian Norvell, Mindy Nye, Scott Parker, Christos Petropoulos, John Pruitt, Steven Ragan, Scott Ryan, Mike Sapeta, Jana Schroth, Suresh Babu Selvaraju, Goran Stevovic, Amanda Suchanek, Andrea Throop, Lyndon Tilson, Thomas Urban, Joe Voshell, Kimberly Wagner, Jonathan Williams, Mary Williamson, Qian Zeng, Tricia Zwiefelhofer, Clinton R. Paden, Duncan MacCannell |
| hCoV-19/USA/AK-PHL8244/2021             | EPI_ISL_1821886 | 3/27/2021 | Alaska State Virology Laboratory  | Alaska State Virology Laboratory                                                             | Stephanie DeRonde, Elva House, Jacob Zidek, Lisa Smith, Ph.D., Jack Chen, Ph.D.                                                                                                                                                                                                                                                                                                                                                                                                                                                                                                                                                                                                                                                                                                                                                                                                                                                                                                                                                                   |
| hCoV-19/USA/AK-PHL8245/2021             | EPI_ISL_1821887 | 4/3/2021  | Alaska State Virology Laboratory  | Alaska State Virology Laboratory                                                             | Stephanie DeRonde, Elva House, Jacob Zidek, Lisa Smith, Ph.D., Jack Chen, Ph.D.                                                                                                                                                                                                                                                                                                                                                                                                                                                                                                                                                                                                                                                                                                                                                                                                                                                                                                                                                                   |
| hCoV-19/USA/AK-PHL8247/2021             | EPI_ISL_1821888 | 4/12/2021 | Alaska State Virology Laboratory  | Alaska State Virology Laboratory                                                             | Stephanie DeRonde, Elva House, Jacob Zidek, Lisa Smith, Ph.D., Jack Chen, Ph.D.                                                                                                                                                                                                                                                                                                                                                                                                                                                                                                                                                                                                                                                                                                                                                                                                                                                                                                                                                                   |
| hCoV-19/USA/AK-PHL8248/2021             | EPI_ISL_1821889 | 4/13/2021 | Alaska State Virology Laboratory  | Alaska State Virology Laboratory                                                             | Stephanie DeRonde, Elva House, Jacob Zidek, Lisa Smith, Ph.D., Jack Chen, Ph.D.                                                                                                                                                                                                                                                                                                                                                                                                                                                                                                                                                                                                                                                                                                                                                                                                                                                                                                                                                                   |
| hCoV-19/USA/AK-PHL7984/2021             | EPI_ISL_1821890 | 4/6/2021  | Alaska State Virology Laboratory  | Alaska State Virology Laboratory                                                             | Stephanie DeRonde, Elva House, Jacob Zidek, Lisa Smith, Ph.D., Jack Chen, Ph.D.                                                                                                                                                                                                                                                                                                                                                                                                                                                                                                                                                                                                                                                                                                                                                                                                                                                                                                                                                                   |
| hCoV-19/USA/AK-PHL8249/2021             | EPI_ISL_1821891 | 4/19/2021 | Alaska State Virology Laboratory  | Alaska State Virology Laboratory                                                             | Stephanie DeRonde, Elva House, Jacob Zidek, Lisa Smith, Ph.D., Jack Chen, Ph.D.                                                                                                                                                                                                                                                                                                                                                                                                                                                                                                                                                                                                                                                                                                                                                                                                                                                                                                                                                                   |
| hCoV-19/USA/AK-PHL8251/2021             | EPI_ISL_1821892 | 4/17/2021 | Alaska State Virology Laboratory  | Alaska State Virology Laboratory                                                             | Stephanie DeRonde, Elva House, Jacob Zidek, Lisa Smith, Ph.D., Jack Chen, Ph.D.                                                                                                                                                                                                                                                                                                                                                                                                                                                                                                                                                                                                                                                                                                                                                                                                                                                                                                                                                                   |
| hCoV-19/USA/AK-PHL8252/2021             | EPI_ISL_1821893 | 4/17/2021 | Alaska State Virology Laboratory  | Alaska State Virology Laboratory                                                             | Stephanie DeRonde, Elva House, Jacob Zidek, Lisa Smith, Ph.D., Jack Chen, Ph.D.                                                                                                                                                                                                                                                                                                                                                                                                                                                                                                                                                                                                                                                                                                                                                                                                                                                                                                                                                                   |
| hCoV-19/USA/AK-PHL8254/2021             | EPI_ISL_1821894 | 4/19/2021 | Alaska State Virology Laboratory  | Alaska State Virology Laboratory                                                             | Stephanie DeRonde, Elva House, Jacob Zidek, Lisa Smith, Ph.D., Jack Chen, Ph.D.                                                                                                                                                                                                                                                                                                                                                                                                                                                                                                                                                                                                                                                                                                                                                                                                                                                                                                                                                                   |
| hCoV-19/USA/AK-PHL8255/2021             | EPI_ISL_1821895 | 4/18/2021 | Alaska State Virology Laboratory  | Alaska State Virology Laboratory                                                             | Stephanie DeRonde, Elva House, Jacob Zidek, Lisa Smith, Ph.D., Jack Chen, Ph.D.                                                                                                                                                                                                                                                                                                                                                                                                                                                                                                                                                                                                                                                                                                                                                                                                                                                                                                                                                                   |
| hCoV-19/USA/AK-PHL8256/2021             | EPI_ISL_1821896 | 4/14/2021 | Alaska State Virology Laboratory  | Alaska State Virology Laboratory                                                             | Stephanie DeRonde, Elva House, Jacob Zidek, Lisa Smith, Ph.D., Jack Chen, Ph.D.                                                                                                                                                                                                                                                                                                                                                                                                                                                                                                                                                                                                                                                                                                                                                                                                                                                                                                                                                                   |



|                                   |                 |           |                                                     |                                                                                              |                                                                                                                                                                                                                                                                                                                                                                  |
|-----------------------------------|-----------------|-----------|-----------------------------------------------------|----------------------------------------------------------------------------------------------|------------------------------------------------------------------------------------------------------------------------------------------------------------------------------------------------------------------------------------------------------------------------------------------------------------------------------------------------------------------|
| hCoV-19/USA/AK-PHL8257/2021       | EPI_ISL_1821897 | 4/14/2021 | Alaska State Virology Laboratory                    | Alaska State Virology Laboratory                                                             | Stephanie DeRonde, Elva House, Jacob Zidek, Lisa Smith, Ph.D., Jack Chen, Ph.D.                                                                                                                                                                                                                                                                                  |
| hCoV-19/USA/AK-PHL8258/2021       | EPI_ISL_1821898 | 4/17/2021 | Alaska State Virology Laboratory                    | Alaska State Virology Laboratory                                                             | Stephanie DeRonde, Elva House, Jacob Zidek, Lisa Smith, Ph.D., Jack Chen, Ph.D.                                                                                                                                                                                                                                                                                  |
| hCoV-19/USA/AK-PHL8261/2021       | EPI_ISL_1821900 | 4/20/2021 | Alaska State Virology Laboratory                    | Alaska State Virology Laboratory                                                             | Stephanie DeRonde, Elva House, Jacob Zidek, Lisa Smith, Ph.D., Jack Chen, Ph.D.                                                                                                                                                                                                                                                                                  |
| hCoV-19/USA/AK-PHL8263/2021       | EPI_ISL_1821901 | 4/22/2021 | Alaska State Virology Laboratory                    | Alaska State Virology Laboratory                                                             | Stephanie DeRonde, Elva House, Jacob Zidek, Lisa Smith, Ph.D., Jack Chen, Ph.D.                                                                                                                                                                                                                                                                                  |
| hCoV-19/USA/AK-PHL8269/2021       | EPI_ISL_1821905 | 4/17/2021 | Alaska State Virology Laboratory                    | Alaska State Virology Laboratory                                                             | Stephanie DeRonde, Elva House, Jacob Zidek, Lisa Smith, Ph.D., Jack Chen, Ph.D.                                                                                                                                                                                                                                                                                  |
| hCoV-19/USA/AK-PHL8270/2021       | EPI_ISL_1821906 | 4/19/2021 | Alaska State Virology Laboratory                    | Alaska State Virology Laboratory                                                             | Stephanie DeRonde, Elva House, Jacob Zidek, Lisa Smith, Ph.D., Jack Chen, Ph.D.                                                                                                                                                                                                                                                                                  |
| hCoV-19/USA/AK-PHL8272/2021       | EPI_ISL_1821908 | 4/19/2021 | Alaska State Virology Laboratory                    | Alaska State Virology Laboratory                                                             | Stephanie DeRonde, Elva House, Jacob Zidek, Lisa Smith, Ph.D., Jack Chen, Ph.D.                                                                                                                                                                                                                                                                                  |
| hCoV-19/USA/AK-PHL8273/2021       | EPI_ISL_1821909 | 4/14/2021 | Alaska State Virology Laboratory                    | Alaska State Virology Laboratory                                                             | Stephanie DeRonde, Elva House, Jacob Zidek, Lisa Smith, Ph.D., Jack Chen, Ph.D.                                                                                                                                                                                                                                                                                  |
| hCoV-19/USA/AK-PHL8274/2021       | EPI_ISL_1821910 | 4/14/2021 | Alaska State Virology Laboratory                    | Alaska State Virology Laboratory                                                             | Stephanie DeRonde, Elva House, Jacob Zidek, Lisa Smith, Ph.D., Jack Chen, Ph.D.                                                                                                                                                                                                                                                                                  |
| hCoV-19/USA/AK-PHL8275/2021       | EPI_ISL_1821911 | 4/19/2021 | Alaska State Virology Laboratory                    | Alaska State Virology Laboratory                                                             | Stephanie DeRonde, Elva House, Jacob Zidek, Lisa Smith, Ph.D., Jack Chen, Ph.D.                                                                                                                                                                                                                                                                                  |
| hCoV-19/USA/AK-PHL8276/2021       | EPI_ISL_1821912 | 4/19/2021 | Alaska State Virology Laboratory                    | Alaska State Virology Laboratory                                                             | Stephanie DeRonde, Elva House, Jacob Zidek, Lisa Smith, Ph.D., Jack Chen, Ph.D.                                                                                                                                                                                                                                                                                  |
| hCoV-19/USA/AK-PHL8278/2021       | EPI_ISL_1821914 | 4/22/2021 | Alaska State Virology Laboratory                    | Alaska State Virology Laboratory                                                             | Stephanie DeRonde, Elva House, Jacob Zidek, Lisa Smith, Ph.D., Jack Chen, Ph.D.                                                                                                                                                                                                                                                                                  |
| hCoV-19/USA/AK-PHL8279/2021       | EPI_ISL_1821915 | 4/21/2021 | Alaska State Virology Laboratory                    | Alaska State Virology Laboratory                                                             | Stephanie DeRonde, Elva House, Jacob Zidek, Lisa Smith, Ph.D., Jack Chen, Ph.D.                                                                                                                                                                                                                                                                                  |
| hCoV-19/USA/AK-PHL8280/2021       | EPI_ISL_1821916 | 4/21/2021 | Alaska State Virology Laboratory                    | Alaska State Virology Laboratory                                                             | Stephanie DeRonde, Elva House, Jacob Zidek, Lisa Smith, Ph.D., Jack Chen, Ph.D.                                                                                                                                                                                                                                                                                  |
| hCoV-19/USA/AK-PHL8281/2021       | EPI_ISL_1821917 | 4/21/2021 | Alaska State Virology Laboratory                    | Alaska State Virology Laboratory                                                             | Stephanie DeRonde, Elva House, Jacob Zidek, Lisa Smith, Ph.D., Jack Chen, Ph.D.                                                                                                                                                                                                                                                                                  |
| hCoV-19/USA/AK-PHL8282/2021       | EPI_ISL_1821918 | 4/14/2021 | Alaska State Virology Laboratory                    | Alaska State Virology Laboratory                                                             | Stephanie DeRonde, Elva House, Jacob Zidek, Lisa Smith, Ph.D., Jack Chen, Ph.D.                                                                                                                                                                                                                                                                                  |
| hCoV-19/USA/AK-CDC-2-4242684/2021 | EPI_ISL_1823929 | 4/6/2021  | AK State Public Health Lab, State Health Department | Centers for Disease Control and Prevention<br>Division of Viral Diseases, Pathogen Discovery | Mili Sheth, Sarah Nobles, Jasmine Padilla, Mark Burroughs, Shoshona Le, Katie Dillon, Peter Cook, Clinton R. Paden, Dhvani Batra, Krista Queen, Kristen Knipe, Dakota Howard, Yvette Unoarumhi, Darlene Wagner, Matthew Schmerer, Ben L. Rambo-Martin, Kristine Lacey, Sam Shepard, Alison Laufer Halpin, Dave Wentworth, Vivien Dugan, Suxiang Tong, Justin Lee |
| hCoV-19/USA/AK-CDC-2-4242591/2021 | EPI_ISL_1823930 | 4/1/2021  | AK State Public Health Lab, State Health Department | Centers for Disease Control and Prevention<br>Division of Viral Diseases, Pathogen Discovery | Mili Sheth, Sarah Nobles, Jasmine Padilla, Mark Burroughs, Shoshona Le, Katie Dillon, Peter Cook, Clinton R. Paden, Dhvani Batra, Krista Queen, Kristen Knipe, Dakota Howard, Yvette Unoarumhi, Darlene Wagner, Matthew Schmerer, Ben L. Rambo-Martin, Kristine Lacey, Sam Shepard, Alison Laufer Halpin, Dave Wentworth, Vivien Dugan, Suxiang Tong, Justin Lee |
| hCoV-19/USA/AK-CDC-2-4242689/2021 | EPI_ISL_1823931 | 4/3/2021  | AK State Public Health Lab, State Health Department | Centers for Disease Control and Prevention<br>Division of Viral Diseases, Pathogen Discovery | Mili Sheth, Sarah Nobles, Jasmine Padilla, Mark Burroughs, Shoshona Le, Katie Dillon, Peter Cook, Clinton R. Paden, Dhvani Batra, Krista Queen, Kristen Knipe, Dakota Howard, Yvette Unoarumhi, Darlene Wagner, Matthew Schmerer, Ben L. Rambo-Martin, Kristine Lacey, Sam Shepard, Alison Laufer Halpin, Dave Wentworth, Vivien Dugan, Suxiang Tong, Justin Lee |
| hCoV-19/USA/AK-CDC-2-4242692/2021 | EPI_ISL_1823932 | 4/7/2021  | AK State Public Health Lab, State Health Department | Centers for Disease Control and Prevention<br>Division of Viral Diseases, Pathogen Discovery | Mili Sheth, Sarah Nobles, Jasmine Padilla, Mark Burroughs, Shoshona Le, Katie Dillon, Peter Cook, Clinton R. Paden, Dhvani Batra, Krista Queen, Kristen Knipe, Dakota Howard, Yvette Unoarumhi, Darlene Wagner, Matthew Schmerer, Ben L. Rambo-Martin, Kristine Lacey, Sam Shepard, Alison Laufer Halpin, Dave Wentworth, Vivien Dugan, Suxiang Tong, Justin Lee |
| hCoV-19/USA/AK-CDC-2-4242582/2021 | EPI_ISL_1823933 | 4/1/2021  | AK State Public Health Lab, State Health Department | Centers for Disease Control and Prevention<br>Division of Viral Diseases, Pathogen Discovery | Mili Sheth, Sarah Nobles, Jasmine Padilla, Mark Burroughs, Shoshona Le, Katie Dillon, Peter Cook, Clinton R. Paden, Dhvani Batra, Krista Queen, Kristen Knipe, Dakota Howard, Yvette Unoarumhi, Darlene Wagner, Matthew Schmerer, Ben L. Rambo-Martin, Kristine Lacey, Sam Shepard, Alison Laufer Halpin, Dave Wentworth, Vivien Dugan, Suxiang Tong, Justin Lee |
| hCoV-19/USA/AK-CDC-2-4242670/2021 | EPI_ISL_1823934 | 4/1/2021  | AK State Public Health Lab, State Health Department | Centers for Disease Control and Prevention<br>Division of Viral Diseases, Pathogen Discovery | Mili Sheth, Sarah Nobles, Jasmine Padilla, Mark Burroughs, Shoshona Le, Katie Dillon, Peter Cook, Clinton R. Paden, Dhvani Batra, Krista Queen, Kristen Knipe, Dakota Howard, Yvette Unoarumhi, Darlene Wagner, Matthew Schmerer, Ben L. Rambo-Martin, Kristine Lacey, Sam Shepard, Alison Laufer Halpin, Dave Wentworth, Vivien Dugan, Suxiang Tong, Justin Lee |
| hCoV-19/USA/AK-CDC-2-4242569/2021 | EPI_ISL_1823935 | 4/1/2021  | AK State Public Health Lab, State Health Department | Centers for Disease Control and Prevention<br>Division of Viral Diseases, Pathogen Discovery | Mili Sheth, Sarah Nobles, Jasmine Padilla, Mark Burroughs, Shoshona Le, Katie Dillon, Peter Cook, Clinton R. Paden, Dhvani Batra, Krista Queen, Kristen Knipe, Dakota Howard, Yvette Unoarumhi, Darlene Wagner, Matthew Schmerer, Ben L. Rambo-Martin, Kristine Lacey, Sam Shepard, Alison Laufer Halpin, Dave Wentworth, Vivien Dugan, Suxiang Tong, Justin Lee |

|                                      |                 |          |                                                     |                                                                                              |                                                                                                                                                                                                                                                                                                                                                                                                                                     |
|--------------------------------------|-----------------|----------|-----------------------------------------------------|----------------------------------------------------------------------------------------------|-------------------------------------------------------------------------------------------------------------------------------------------------------------------------------------------------------------------------------------------------------------------------------------------------------------------------------------------------------------------------------------------------------------------------------------|
| hCoV-19/USA/AK-CDC-2-4242588/2021    | EPI_ISL_1823936 | 4/5/2021 | AK State Public Health Lab, State Health Department | Centers for Disease Control and Prevention<br>Division of Viral Diseases, Pathogen Discovery | Mili Sheth, Sarah Nobles, Jasmine Padilla, Mark Burroughs, Shoshona Le, Katie Dillon, Peter Cook, Clinton R. Paden, Dhvani Batra, Krista Queen, Kristen Knipe, Dakota Howard, Yvette Unoarumhi, Darlene Wagner, Matthew Schmerer, Ben L. Rambo-Martin, Kristine Lacek, Sam Shepard, Alison Laufer Halpin, Dave Wentworth, Vivien Dugan, Suxiang Tong, Justin Lee                                                                    |
| hCoV-19/USA/AK-CDC-2-4242556/2021    | EPI_ISL_1823937 | 4/3/2021 | AK State Public Health Lab, State Health Department | Centers for Disease Control and Prevention<br>Division of Viral Diseases, Pathogen Discovery | Mili Sheth, Sarah Nobles, Jasmine Padilla, Mark Burroughs, Shoshona Le, Katie Dillon, Peter Cook, Clinton R. Paden, Dhvani Batra, Krista Queen, Kristen Knipe, Dakota Howard, Yvette Unoarumhi, Darlene Wagner, Matthew Schmerer, Ben L. Rambo-Martin, Kristine Lacek, Sam Shepard, Alison Laufer Halpin, Dave Wentworth, Vivien Dugan, Suxiang Tong, Justin Lee                                                                    |
| hCoV-19/USA/AK-CDC-2-4242660/2021    | EPI_ISL_1823938 | 4/1/2021 | AK State Public Health Lab, State Health Department | Centers for Disease Control and Prevention<br>Division of Viral Diseases, Pathogen Discovery | Mili Sheth, Sarah Nobles, Jasmine Padilla, Mark Burroughs, Shoshona Le, Katie Dillon, Peter Cook, Clinton R. Paden, Dhvani Batra, Krista Queen, Kristen Knipe, Dakota Howard, Yvette Unoarumhi, Darlene Wagner, Matthew Schmerer, Ben L. Rambo-Martin, Kristine Lacek, Sam Shepard, Alison Laufer Halpin, Dave Wentworth, Vivien Dugan, Suxiang Tong, Justin Lee                                                                    |
| hCoV-19/USA/AK-CDC-2-4242678/2021    | EPI_ISL_1823940 | 4/6/2021 | AK State Public Health Lab, State Health Department | Centers for Disease Control and Prevention<br>Division of Viral Diseases, Pathogen Discovery | Mili Sheth, Sarah Nobles, Jasmine Padilla, Mark Burroughs, Shoshona Le, Katie Dillon, Peter Cook, Clinton R. Paden, Dhvani Batra, Krista Queen, Kristen Knipe, Dakota Howard, Yvette Unoarumhi, Darlene Wagner, Matthew Schmerer, Ben L. Rambo-Martin, Kristine Lacek, Sam Shepard, Alison Laufer Halpin, Dave Wentworth, Vivien Dugan, Suxiang Tong, Justin Lee                                                                    |
| hCoV-19/USA/AK-CDC-2-4242568/2021    | EPI_ISL_1823941 | 4/6/2021 | AK State Public Health Lab, State Health Department | Centers for Disease Control and Prevention<br>Division of Viral Diseases, Pathogen Discovery | Mili Sheth, Sarah Nobles, Jasmine Padilla, Mark Burroughs, Shoshona Le, Katie Dillon, Peter Cook, Clinton R. Paden, Dhvani Batra, Krista Queen, Kristen Knipe, Dakota Howard, Yvette Unoarumhi, Darlene Wagner, Matthew Schmerer, Ben L. Rambo-Martin, Kristine Lacek, Sam Shepard, Alison Laufer Halpin, Dave Wentworth, Vivien Dugan, Suxiang Tong, Justin Lee                                                                    |
| hCoV-19/USA/AK-CDC-2-4242562/2021    | EPI_ISL_1823942 | 4/5/2021 | AK State Public Health Lab, State Health Department | Centers for Disease Control and Prevention<br>Division of Viral Diseases, Pathogen Discovery | Mili Sheth, Sarah Nobles, Jasmine Padilla, Mark Burroughs, Shoshona Le, Katie Dillon, Peter Cook, Clinton R. Paden, Dhvani Batra, Krista Queen, Kristen Knipe, Dakota Howard, Yvette Unoarumhi, Darlene Wagner, Matthew Schmerer, Ben L. Rambo-Martin, Kristine Lacek, Sam Shepard, Alison Laufer Halpin, Dave Wentworth, Vivien Dugan, Suxiang Tong, Justin Lee                                                                    |
| hCoV-19/USA/AK-CDC-2-4242583/2021    | EPI_ISL_1823943 | 4/6/2021 | AK State Public Health Lab, State Health Department | Centers for Disease Control and Prevention<br>Division of Viral Diseases, Pathogen Discovery | Mili Sheth, Sarah Nobles, Jasmine Padilla, Mark Burroughs, Shoshona Le, Katie Dillon, Peter Cook, Clinton R. Paden, Dhvani Batra, Krista Queen, Kristen Knipe, Dakota Howard, Yvette Unoarumhi, Darlene Wagner, Matthew Schmerer, Ben L. Rambo-Martin, Kristine Lacek, Sam Shepard, Alison Laufer Halpin, Dave Wentworth, Vivien Dugan, Suxiang Tong, Justin Lee                                                                    |
| hCoV-19/USA/AK-CDC-ASC210041459/2021 | EPI_ISL_1835209 | 4/1/2021 | Aegis Sciences Corporation                          | Centers for Disease Control and Prevention<br>Division of Viral Diseases, Pathogen Discovery | Dakota Howard, Dhvani Batra, Peter W. Cook, Kara Moser, Adrian Paskey, Jason Caravas, Benjamin Rambo-Martin, Shatavia Morrison, Christopher Gulvick, Scott Sammons, Yvette Unoarumhi, Darlene Wagner, Matthew Schmerer, Cyndi Clark, Patrick Campbell, Rob Case, Vikramsinha Ghorpade, Holly Houdeshell, Ola Kvalvaag, Dillon Nall, Ethan Sanders, Alec Vest, Shaun Westlund, Matthew Hardison, Clinton R. Paden, Duncan MacCannell |
| hCoV-19/USA/AK-CDC-ASC210049916/2021 | EPI_ISL_1835480 | 4/7/2021 | Aegis Sciences Corporation                          | Centers for Disease Control and Prevention<br>Division of Viral Diseases, Pathogen Discovery | Dakota Howard, Dhvani Batra, Peter W. Cook, Kara Moser, Adrian Paskey, Jason Caravas, Benjamin Rambo-Martin, Shatavia Morrison, Christopher Gulvick, Scott Sammons, Yvette Unoarumhi, Darlene Wagner, Matthew Schmerer, Cyndi Clark, Patrick Campbell, Rob Case, Vikramsinha Ghorpade, Holly Houdeshell, Ola Kvalvaag, Dillon Nall, Ethan Sanders, Alec Vest, Shaun Westlund, Matthew Hardison, Clinton R. Paden, Duncan MacCannell |
| hCoV-19/USA/AK-CDC-ASC210049917/2021 | EPI_ISL_1835481 | 4/7/2021 | Aegis Sciences Corporation                          | Centers for Disease Control and Prevention<br>Division of Viral Diseases, Pathogen Discovery | Dakota Howard, Dhvani Batra, Peter W. Cook, Kara Moser, Adrian Paskey, Jason Caravas, Benjamin Rambo-Martin, Shatavia Morrison, Christopher Gulvick, Scott Sammons, Yvette Unoarumhi, Darlene Wagner, Matthew Schmerer, Cyndi Clark, Patrick Campbell, Rob Case, Vikramsinha Ghorpade, Holly Houdeshell, Ola Kvalvaag, Dillon Nall, Ethan Sanders, Alec Vest, Shaun Westlund, Matthew Hardison, Clinton R. Paden, Duncan MacCannell |

|                                      |                 |           |                                  |                                                                                              |                                                                                                                                                                                                                                                                                                                                                                                                                                      |
|--------------------------------------|-----------------|-----------|----------------------------------|----------------------------------------------------------------------------------------------|--------------------------------------------------------------------------------------------------------------------------------------------------------------------------------------------------------------------------------------------------------------------------------------------------------------------------------------------------------------------------------------------------------------------------------------|
| hCoV-19/USA/AK-CDC-ASC210049382/2021 | EPI_ISL_1837645 | 4/5/2021  | Aegis Sciences Corporation       | Centers for Disease Control and Prevention<br>Division of Viral Diseases, Pathogen Discovery | Dakota Howard, Dhvani Batra, Peter W. Cook, Kara Moser, Adrian Paskey, Jason Caravas, Benjamin Rambo-Martin, Shatavia Morrison, Christopher Gulwick, Scott Sammons, Yvette Unoarumhi, Darlene Wagner, Matthew Schmeurer, Cyndi Clark, Patrick Campbell, Rob Case, Vikramsinha Ghorpade, Holly Houdeshell, Ola Kvalvaag, Dillon Nall, Ethan Sanders, Alec Vest, Shaun Westlund, Matthew Hardison, Clinton R. Paden, Duncan MacCannell |
| hCoV-19/USA/AK-CDC-ASC210049384/2021 | EPI_ISL_1837646 | 4/6/2021  | Aegis Sciences Corporation       | Centers for Disease Control and Prevention<br>Division of Viral Diseases, Pathogen Discovery | Dakota Howard, Dhvani Batra, Peter W. Cook, Kara Moser, Adrian Paskey, Jason Caravas, Benjamin Rambo-Martin, Shatavia Morrison, Christopher Gulwick, Scott Sammons, Yvette Unoarumhi, Darlene Wagner, Matthew Schmeurer, Cyndi Clark, Patrick Campbell, Rob Case, Vikramsinha Ghorpade, Holly Houdeshell, Ola Kvalvaag, Dillon Nall, Ethan Sanders, Alec Vest, Shaun Westlund, Matthew Hardison, Clinton R. Paden, Duncan MacCannell |
| hCoV-19/USA/AK-CDC-ASC210053157/2021 | EPI_ISL_1838090 | 4/7/2021  | Aegis Sciences Corporation       | Centers for Disease Control and Prevention<br>Division of Viral Diseases, Pathogen Discovery | Dakota Howard, Dhvani Batra, Peter W. Cook, Kara Moser, Adrian Paskey, Jason Caravas, Benjamin Rambo-Martin, Shatavia Morrison, Christopher Gulwick, Scott Sammons, Yvette Unoarumhi, Darlene Wagner, Matthew Schmeurer, Cyndi Clark, Patrick Campbell, Rob Case, Vikramsinha Ghorpade, Holly Houdeshell, Ola Kvalvaag, Dillon Nall, Ethan Sanders, Alec Vest, Shaun Westlund, Matthew Hardison, Clinton R. Paden, Duncan MacCannell |
| hCoV-19/USA/AK-PHL7928/2021          | EPI_ISL_1621162 | 4/6/2021  | Alaska State Virology Laboratory | Alaska State Virology Laboratory                                                             | Stephanie DeRonde, Elva House, Lisa Smith, Ph.D., Jack Chen, Ph.D.                                                                                                                                                                                                                                                                                                                                                                   |
| hCoV-19/USA/AK-PHL8231/2021          | EPI_ISL_1789660 | 4/19/2021 | Alaska State Virology Laboratory | Alaska State Virology Laboratory                                                             | Stephanie DeRonde, Elva House, Lisa Smith, Ph.D., Jack Chen, Ph.D.                                                                                                                                                                                                                                                                                                                                                                   |
| hCoV-19/USA/AK-PHL8271/2021          | EPI_ISL_1821907 | 4/19/2021 | Alaska State Virology Laboratory | Alaska State Virology Laboratory                                                             | Stephanie DeRonde, Elva House, Jacob Zidek, Lisa Smith, Ph.D., Jack Chen, Ph.D.                                                                                                                                                                                                                                                                                                                                                      |
| hCoV-19/USA/AK-PHL8201/2021          | EPI_ISL_1789633 | 4/16/2021 | Alaska State Virology Laboratory | Alaska State Virology Laboratory                                                             | Stephanie DeRonde, Elva House, Lisa Smith, Ph.D., Jack Chen, Ph.D.                                                                                                                                                                                                                                                                                                                                                                   |
| hCoV-19/USA/AK-PHL8220/2021          | EPI_ISL_1789648 | 4/13/2021 | Alaska State Virology Laboratory | Alaska State Virology Laboratory                                                             | Stephanie DeRonde, Elva House, Lisa Smith, Ph.D., Jack Chen, Ph.D.                                                                                                                                                                                                                                                                                                                                                                   |
| hCoV-19/USA/AK-PHL7631/2021          | EPI_ISL_1529088 | 3/16/2021 | Alaska State Virology Laboratory | Alaska State Virology Laboratory                                                             | Stephanie DeRonde, Elva House, Lisa Smith, Ph.D., Jack Chen, Ph.D.                                                                                                                                                                                                                                                                                                                                                                   |
| hCoV-19/USA/AK-PHL8105/2021          | EPI_ISL_1893796 | 4/1/2021  | Alaska State Virology Laboratory | Alaska State Virology Laboratory                                                             | Stephanie DeRonde, Elva House, Jacob Zidek, Lisa Smith, Ph.D., Jack Chen, Ph.D.                                                                                                                                                                                                                                                                                                                                                      |
| hCoV-19/USA/AK-PHL8112/2021          | EPI_ISL_1893813 | 4/12/2021 | Alaska State Virology Laboratory | Alaska State Virology Laboratory                                                             | Stephanie DeRonde, Elva House, Jacob Zidek, Lisa Smith, Ph.D., Jack Chen, Ph.D.                                                                                                                                                                                                                                                                                                                                                      |
| hCoV-19/USA/AK-PHL8113/2021          | EPI_ISL_1893815 | 4/8/2021  | Alaska State Virology Laboratory | Alaska State Virology Laboratory                                                             | Stephanie DeRonde, Elva House, Jacob Zidek, Lisa Smith, Ph.D., Jack Chen, Ph.D.                                                                                                                                                                                                                                                                                                                                                      |
| hCoV-19/USA/AK-PHL8122/2021          | EPI_ISL_1893829 | 4/16/2021 | Alaska State Virology Laboratory | Alaska State Virology Laboratory                                                             | Stephanie DeRonde, Elva House, Jacob Zidek, Lisa Smith, Ph.D., Jack Chen, Ph.D.                                                                                                                                                                                                                                                                                                                                                      |
| hCoV-19/USA/AK-PHL8124/2021          | EPI_ISL_1893836 | 4/13/2021 | Alaska State Virology Laboratory | Alaska State Virology Laboratory                                                             | Stephanie DeRonde, Elva House, Jacob Zidek, Lisa Smith, Ph.D., Jack Chen, Ph.D.                                                                                                                                                                                                                                                                                                                                                      |
| hCoV-19/USA/AK-PHL8128/2021          | EPI_ISL_1893856 | 4/17/2021 | Alaska State Virology Laboratory | Alaska State Virology Laboratory                                                             | Stephanie DeRonde, Elva House, Jacob Zidek, Lisa Smith, Ph.D., Jack Chen, Ph.D.                                                                                                                                                                                                                                                                                                                                                      |
| hCoV-19/USA/AK-PHL8129/2021          | EPI_ISL_1893861 | 4/15/2021 | Alaska State Virology Laboratory | Alaska State Virology Laboratory                                                             | Stephanie DeRonde, Elva House, Jacob Zidek, Lisa Smith, Ph.D., Jack Chen, Ph.D.                                                                                                                                                                                                                                                                                                                                                      |
| hCoV-19/USA/AK-PHL8130/2021          | EPI_ISL_1893867 | 4/15/2021 | Alaska State Virology Laboratory | Alaska State Virology Laboratory                                                             | Stephanie DeRonde, Elva House, Jacob Zidek, Lisa Smith, Ph.D., Jack Chen, Ph.D.                                                                                                                                                                                                                                                                                                                                                      |
| hCoV-19/USA/AK-PHL8135/2021          | EPI_ISL_1893877 | 4/14/2021 | Alaska State Virology Laboratory | Alaska State Virology Laboratory                                                             | Stephanie DeRonde, Elva House, Jacob Zidek, Lisa Smith, Ph.D., Jack Chen, Ph.D.                                                                                                                                                                                                                                                                                                                                                      |
| hCoV-19/USA/AK-PHL8143/2021          | EPI_ISL_1893892 | 4/12/2021 | Alaska State Virology Laboratory | Alaska State Virology Laboratory                                                             | Stephanie DeRonde, Elva House, Jacob Zidek, Lisa Smith, Ph.D., Jack Chen, Ph.D.                                                                                                                                                                                                                                                                                                                                                      |
| hCoV-19/USA/AK-PHL7821/2021          | EPI_ISL_1575043 | 4/1/2021  | Alaska State Virology Laboratory | Alaska State Virology Laboratory                                                             | Stephanie DeRonde, Elva House, Lisa Smith, Ph.D., Jack Chen, Ph.D.                                                                                                                                                                                                                                                                                                                                                                   |
| hCoV-19/USA/AK-PHL7826/2021          | EPI_ISL_1575047 | 3/29/2021 | Alaska State Virology Laboratory | Alaska State Virology Laboratory                                                             | Stephanie DeRonde, Elva House, Lisa Smith, Ph.D., Jack Chen, Ph.D.                                                                                                                                                                                                                                                                                                                                                                   |
| hCoV-19/USA/AK-PHL7832/2021          | EPI_ISL_1575053 | 3/30/2021 | Alaska State Virology Laboratory | Alaska State Virology Laboratory                                                             | Stephanie DeRonde, Elva House, Lisa Smith, Ph.D., Jack Chen, Ph.D.                                                                                                                                                                                                                                                                                                                                                                   |
| hCoV-19/USA/AK-PHL7837/2021          | EPI_ISL_1575058 | 3/30/2021 | Alaska State Virology Laboratory | Alaska State Virology Laboratory                                                             | Stephanie DeRonde, Elva House, Lisa Smith, Ph.D., Jack Chen, Ph.D.                                                                                                                                                                                                                                                                                                                                                                   |
| hCoV-19/USA/AK-PHL7838/2021          | EPI_ISL_1575059 | 3/29/2021 | Alaska State Virology Laboratory | Alaska State Virology Laboratory                                                             | Stephanie DeRonde, Elva House, Lisa Smith, Ph.D., Jack Chen, Ph.D.                                                                                                                                                                                                                                                                                                                                                                   |
| hCoV-19/USA/AK-PHL7841/2021          | EPI_ISL_1575062 | 3/29/2021 | Alaska State Virology Laboratory | Alaska State Virology Laboratory                                                             | Stephanie DeRonde, Elva House, Lisa Smith, Ph.D., Jack Chen, Ph.D.                                                                                                                                                                                                                                                                                                                                                                   |
| hCoV-19/USA/AK-PHL7845/2021          | EPI_ISL_1575066 | 3/30/2021 | Alaska State Virology Laboratory | Alaska State Virology Laboratory                                                             | Stephanie DeRonde, Elva House, Lisa Smith, Ph.D., Jack Chen, Ph.D.                                                                                                                                                                                                                                                                                                                                                                   |
| hCoV-19/USA/AK-PHL7848/2021          | EPI_ISL_1575069 | 3/29/2021 | Alaska State Virology Laboratory | Alaska State Virology Laboratory                                                             | Stephanie DeRonde, Elva House, Lisa Smith, Ph.D., Jack Chen, Ph.D.                                                                                                                                                                                                                                                                                                                                                                   |
| hCoV-19/USA/AK-PHL7853/2021          | EPI_ISL_1575074 | 3/30/2021 | Alaska State Virology Laboratory | Alaska State Virology Laboratory                                                             | Stephanie DeRonde, Elva House, Lisa Smith, Ph.D., Jack Chen, Ph.D.                                                                                                                                                                                                                                                                                                                                                                   |
| hCoV-19/USA/AK-PHL7913/2021          | EPI_ISL_1621159 | 4/2/2021  | Alaska State Virology Laboratory | Alaska State Virology Laboratory                                                             | Stephanie DeRonde, Elva House, Lisa Smith, Ph.D., Jack Chen, Ph.D.                                                                                                                                                                                                                                                                                                                                                                   |
| hCoV-19/USA/AK-PHL7914/2021          | EPI_ISL_1621160 | 4/3/2021  | Alaska State Virology Laboratory | Alaska State Virology Laboratory                                                             | Stephanie DeRonde, Elva House, Lisa Smith, Ph.D., Jack Chen, Ph.D.                                                                                                                                                                                                                                                                                                                                                                   |
| hCoV-19/USA/AK-PHL7918/2021          | EPI_ISL_1621161 | 4/3/2021  | Alaska State Virology Laboratory | Alaska State Virology Laboratory                                                             | Stephanie DeRonde, Elva House, Lisa Smith, Ph.D., Jack Chen, Ph.D.                                                                                                                                                                                                                                                                                                                                                                   |
| hCoV-19/USA/AK-PHL7936/2021          | EPI_ISL_1621163 | 4/5/2021  | Alaska State Virology Laboratory | Alaska State Virology Laboratory                                                             | Stephanie DeRonde, Elva House, Lisa Smith, Ph.D., Jack Chen, Ph.D.                                                                                                                                                                                                                                                                                                                                                                   |
| hCoV-19/USA/AK-PHL7941/2021          | EPI_ISL_1621164 | 4/5/2021  | Alaska State Virology Laboratory | Alaska State Virology Laboratory                                                             | Stephanie DeRonde, Elva House, Lisa Smith, Ph.D., Jack Chen, Ph.D.                                                                                                                                                                                                                                                                                                                                                                   |
| hCoV-19/USA/AK-PHL7908/2021          | EPI_ISL_1621166 | 3/31/2021 | Alaska State Virology Laboratory | Alaska State Virology Laboratory                                                             | Stephanie DeRonde, Elva House, Lisa Smith, Ph.D., Jack Chen, Ph.D.                                                                                                                                                                                                                                                                                                                                                                   |
| hCoV-19/USA/AK-PHL7924/2021          | EPI_ISL_1621169 | 4/4/2021  | Alaska State Virology Laboratory | Alaska State Virology Laboratory                                                             | Stephanie DeRonde, Elva House, Lisa Smith, Ph.D., Jack Chen, Ph.D.                                                                                                                                                                                                                                                                                                                                                                   |
| hCoV-19/USA/AK-PHL7905/2021          | EPI_ISL_1621170 | 4/7/2021  | Alaska State Virology Laboratory | Alaska State Virology Laboratory                                                             | Stephanie DeRonde, Elva House, Lisa Smith, Ph.D., Jack Chen, Ph.D.                                                                                                                                                                                                                                                                                                                                                                   |
| hCoV-19/USA/AK-PHL7906/2021          | EPI_ISL_1621171 | 4/7/2021  | Alaska State Virology Laboratory | Alaska State Virology Laboratory                                                             | Stephanie DeRonde, Elva House, Lisa Smith, Ph.D., Jack Chen, Ph.D.                                                                                                                                                                                                                                                                                                                                                                   |

|                                   |                 |           |                                                     |                                                                                              |                                                                                                                                                                                                                                                                                                                                                                                                                                                                                                                                                                                                                                                                                                                                                                                                                                                                                                                                                                                                                                                   |
|-----------------------------------|-----------------|-----------|-----------------------------------------------------|----------------------------------------------------------------------------------------------|---------------------------------------------------------------------------------------------------------------------------------------------------------------------------------------------------------------------------------------------------------------------------------------------------------------------------------------------------------------------------------------------------------------------------------------------------------------------------------------------------------------------------------------------------------------------------------------------------------------------------------------------------------------------------------------------------------------------------------------------------------------------------------------------------------------------------------------------------------------------------------------------------------------------------------------------------------------------------------------------------------------------------------------------------|
| hCoV-19/USA/AK-PHL7907/2021       | EPI_ISL_1621172 | 3/31/2021 | Alaska State Virology Laboratory                    | Alaska State Virology Laboratory                                                             | Stephanie DeRonde, Elva House, Lisa Smith, Ph.D., Jack Chen, Ph.D.                                                                                                                                                                                                                                                                                                                                                                                                                                                                                                                                                                                                                                                                                                                                                                                                                                                                                                                                                                                |
| hCoV-19/USA/AK-PHL7909/2021       | EPI_ISL_1621173 | 3/31/2021 | Alaska State Virology Laboratory                    | Alaska State Virology Laboratory                                                             | Stephanie DeRonde, Elva House, Lisa Smith, Ph.D., Jack Chen, Ph.D.                                                                                                                                                                                                                                                                                                                                                                                                                                                                                                                                                                                                                                                                                                                                                                                                                                                                                                                                                                                |
| hCoV-19/USA/AK-PHL7912/2021       | EPI_ISL_1621175 | 4/3/2021  | Alaska State Virology Laboratory                    | Alaska State Virology Laboratory                                                             | Stephanie DeRonde, Elva House, Lisa Smith, Ph.D., Jack Chen, Ph.D.                                                                                                                                                                                                                                                                                                                                                                                                                                                                                                                                                                                                                                                                                                                                                                                                                                                                                                                                                                                |
| hCoV-19/USA/AK-PHL7916/2021       | EPI_ISL_1621176 | 4/3/2021  | Alaska State Virology Laboratory                    | Alaska State Virology Laboratory                                                             | Stephanie DeRonde, Elva House, Lisa Smith, Ph.D., Jack Chen, Ph.D.                                                                                                                                                                                                                                                                                                                                                                                                                                                                                                                                                                                                                                                                                                                                                                                                                                                                                                                                                                                |
| hCoV-19/USA/AK-PHL7920/2021       | EPI_ISL_1621177 | 4/4/2021  | Alaska State Virology Laboratory                    | Alaska State Virology Laboratory                                                             | Stephanie DeRonde, Elva House, Lisa Smith, Ph.D., Jack Chen, Ph.D.                                                                                                                                                                                                                                                                                                                                                                                                                                                                                                                                                                                                                                                                                                                                                                                                                                                                                                                                                                                |
| hCoV-19/USA/AK-PHL7922/2021       | EPI_ISL_1621178 | 4/4/2021  | Alaska State Virology Laboratory                    | Alaska State Virology Laboratory                                                             | Stephanie DeRonde, Elva House, Lisa Smith, Ph.D., Jack Chen, Ph.D.                                                                                                                                                                                                                                                                                                                                                                                                                                                                                                                                                                                                                                                                                                                                                                                                                                                                                                                                                                                |
| hCoV-19/USA/AK-PHL7925/2021       | EPI_ISL_1621179 | 4/2/2021  | Alaska State Virology Laboratory                    | Alaska State Virology Laboratory                                                             | Stephanie DeRonde, Elva House, Lisa Smith, Ph.D., Jack Chen, Ph.D.                                                                                                                                                                                                                                                                                                                                                                                                                                                                                                                                                                                                                                                                                                                                                                                                                                                                                                                                                                                |
| hCoV-19/USA/AK-PHL7926/2021       | EPI_ISL_1621180 | 4/2/2021  | Alaska State Virology Laboratory                    | Alaska State Virology Laboratory                                                             | Stephanie DeRonde, Elva House, Lisa Smith, Ph.D., Jack Chen, Ph.D.                                                                                                                                                                                                                                                                                                                                                                                                                                                                                                                                                                                                                                                                                                                                                                                                                                                                                                                                                                                |
| hCoV-19/USA/AK-PHL7927/2021       | EPI_ISL_1621181 | 4/7/2021  | Alaska State Virology Laboratory                    | Alaska State Virology Laboratory                                                             | Stephanie DeRonde, Elva House, Lisa Smith, Ph.D., Jack Chen, Ph.D.                                                                                                                                                                                                                                                                                                                                                                                                                                                                                                                                                                                                                                                                                                                                                                                                                                                                                                                                                                                |
| hCoV-19/USA/AK-PHL7930/2021       | EPI_ISL_1621182 | 4/3/2021  | Alaska State Virology Laboratory                    | Alaska State Virology Laboratory                                                             | Stephanie DeRonde, Elva House, Lisa Smith, Ph.D., Jack Chen, Ph.D.                                                                                                                                                                                                                                                                                                                                                                                                                                                                                                                                                                                                                                                                                                                                                                                                                                                                                                                                                                                |
| hCoV-19/USA/AK-PHL7931/2021       | EPI_ISL_1621183 | 4/3/2021  | Alaska State Virology Laboratory                    | Alaska State Virology Laboratory                                                             | Stephanie DeRonde, Elva House, Lisa Smith, Ph.D., Jack Chen, Ph.D.                                                                                                                                                                                                                                                                                                                                                                                                                                                                                                                                                                                                                                                                                                                                                                                                                                                                                                                                                                                |
| hCoV-19/USA/AK-PHL7932/2021       | EPI_ISL_1621184 | 4/7/2021  | Alaska State Virology Laboratory                    | Alaska State Virology Laboratory                                                             | Stephanie DeRonde, Elva House, Lisa Smith, Ph.D., Jack Chen, Ph.D.                                                                                                                                                                                                                                                                                                                                                                                                                                                                                                                                                                                                                                                                                                                                                                                                                                                                                                                                                                                |
| hCoV-19/USA/AK-PHL7933/2021       | EPI_ISL_1621185 | 4/5/2021  | Alaska State Virology Laboratory                    | Alaska State Virology Laboratory                                                             | Stephanie DeRonde, Elva House, Lisa Smith, Ph.D., Jack Chen, Ph.D.                                                                                                                                                                                                                                                                                                                                                                                                                                                                                                                                                                                                                                                                                                                                                                                                                                                                                                                                                                                |
| hCoV-19/USA/AK-PHL7940/2021       | EPI_ISL_1621188 | 4/5/2021  | Alaska State Virology Laboratory                    | Alaska State Virology Laboratory                                                             | Stephanie DeRonde, Elva House, Lisa Smith, Ph.D., Jack Chen, Ph.D.                                                                                                                                                                                                                                                                                                                                                                                                                                                                                                                                                                                                                                                                                                                                                                                                                                                                                                                                                                                |
| hCoV-19/USA/AK-PHL7942/2021       | EPI_ISL_1621189 | 4/5/2021  | Alaska State Virology Laboratory                    | Alaska State Virology Laboratory                                                             | Stephanie DeRonde, Elva House, Lisa Smith, Ph.D., Jack Chen, Ph.D.                                                                                                                                                                                                                                                                                                                                                                                                                                                                                                                                                                                                                                                                                                                                                                                                                                                                                                                                                                                |
| hCoV-19/USA/AK-PHL7943/2021       | EPI_ISL_1621190 | 4/5/2021  | Alaska State Virology Laboratory                    | Alaska State Virology Laboratory                                                             | Stephanie DeRonde, Elva House, Lisa Smith, Ph.D., Jack Chen, Ph.D.                                                                                                                                                                                                                                                                                                                                                                                                                                                                                                                                                                                                                                                                                                                                                                                                                                                                                                                                                                                |
| hCoV-19/USA/AK-PHL7944/2021       | EPI_ISL_1621191 | 4/5/2021  | Alaska State Virology Laboratory                    | Alaska State Virology Laboratory                                                             | Stephanie DeRonde, Elva House, Lisa Smith, Ph.D., Jack Chen, Ph.D.                                                                                                                                                                                                                                                                                                                                                                                                                                                                                                                                                                                                                                                                                                                                                                                                                                                                                                                                                                                |
| hCoV-19/USA/AK-PHL7945/2021       | EPI_ISL_1621192 | 4/5/2021  | Alaska State Virology Laboratory                    | Alaska State Virology Laboratory                                                             | Stephanie DeRonde, Elva House, Lisa Smith, Ph.D., Jack Chen, Ph.D.                                                                                                                                                                                                                                                                                                                                                                                                                                                                                                                                                                                                                                                                                                                                                                                                                                                                                                                                                                                |
| hCoV-19/USA/AK-PHL7946/2021       | EPI_ISL_1621193 | 4/5/2021  | Alaska State Virology Laboratory                    | Alaska State Virology Laboratory                                                             | Stephanie DeRonde, Elva House, Lisa Smith, Ph.D., Jack Chen, Ph.D.                                                                                                                                                                                                                                                                                                                                                                                                                                                                                                                                                                                                                                                                                                                                                                                                                                                                                                                                                                                |
| hCoV-19/USA/AK-PHL7947/2021       | EPI_ISL_1621194 | 4/5/2021  | Alaska State Virology Laboratory                    | Alaska State Virology Laboratory                                                             | Stephanie DeRonde, Elva House, Lisa Smith, Ph.D., Jack Chen, Ph.D.                                                                                                                                                                                                                                                                                                                                                                                                                                                                                                                                                                                                                                                                                                                                                                                                                                                                                                                                                                                |
| hCoV-19/USA/AK-PHL7948/2021       | EPI_ISL_1621195 | 4/5/2021  | Alaska State Virology Laboratory                    | Alaska State Virology Laboratory                                                             | Stephanie DeRonde, Elva House, Lisa Smith, Ph.D., Jack Chen, Ph.D.                                                                                                                                                                                                                                                                                                                                                                                                                                                                                                                                                                                                                                                                                                                                                                                                                                                                                                                                                                                |
| hCoV-19/USA/AK-PHL7949/2021       | EPI_ISL_1621196 | 4/5/2021  | Alaska State Virology Laboratory                    | Alaska State Virology Laboratory                                                             | Stephanie DeRonde, Elva House, Lisa Smith, Ph.D., Jack Chen, Ph.D.                                                                                                                                                                                                                                                                                                                                                                                                                                                                                                                                                                                                                                                                                                                                                                                                                                                                                                                                                                                |
| hCoV-19/USA/AK-CDC-LC0044931/2021 | EPI_ISL_1799072 | 4/17/2021 | Laboratory Corporation of America                   | Centers for Disease Control and Prevention<br>Division of Viral Diseases, Pathogen Discovery | Dakota Howard, Dhvani Batra, Peter W. Cook, Kara Moser, Adrian Paskey, Jason Caravas, Benjamin Rambo-Martin, Shatavia Morrison, Christopher Gulvick, Scott Sammons, Yvette Unoarumhi, Darlene Wagner, Matthew Schmerer, Minoos Agarwal, Eyad Almasri, Debbie Boles, Ayla Burns, Nuthawin Charoensri, Oren Cohen, Susan Countryman, Mary Ann Cristobal, Bobbi Croy, Suzanne Dale, Hrushikesh Deshmukh, Amanda Douglas, Vincent Drouillon, Marcia Eisenberg, Howard Engler, Rama Ghatti, Prashant Gupta, Susan Hicks, Jake Humphrey, Lax Iyer, Manoj Jain, Mohan Kolli, Brian Krueger, Tim Kuphal, Stanley Letovsky, Michael Levandoski, Craig Lukasik, Jonathan Meltzer, Brian Norvell, Mindy Nye, Scott Parker, Christos Petropoulos, John Pruitt, Steven Ragan, Scott Ryan, Mike Sapeta, Jana Schroth, Suresh Babu Selvaraju, Goran Stevovic, Amanda Suchanek, Andrea Throop, Lyndon Tilson, Thomas Urban, Joe Voshell, Kimberly Wagner, Jonathan Williams, Mary Williamson, Qian Zeng, Tricia Zwiefelhofer, Clinton R. Paden, Duncan MacCannell |
| hCoV-19/USA/AK-PHL7937/2021       | EPI_ISL_1621165 | 4/5/2021  | Alaska State Virology Laboratory                    | Alaska State Virology Laboratory                                                             | Stephanie DeRonde, Elva House, Lisa Smith, Ph.D., Jack Chen, Ph.D.                                                                                                                                                                                                                                                                                                                                                                                                                                                                                                                                                                                                                                                                                                                                                                                                                                                                                                                                                                                |
| hCoV-19/USA/AK-PHL7910/2021       | EPI_ISL_1621167 | 3/29/2021 | Alaska State Virology Laboratory                    | Alaska State Virology Laboratory                                                             | Stephanie DeRonde, Elva House, Lisa Smith, Ph.D., Jack Chen, Ph.D.                                                                                                                                                                                                                                                                                                                                                                                                                                                                                                                                                                                                                                                                                                                                                                                                                                                                                                                                                                                |
| hCoV-19/USA/AK-PHL7939/2021       | EPI_ISL_1621168 | 4/5/2021  | Alaska State Virology Laboratory                    | Alaska State Virology Laboratory                                                             | Stephanie DeRonde, Elva House, Lisa Smith, Ph.D., Jack Chen, Ph.D.                                                                                                                                                                                                                                                                                                                                                                                                                                                                                                                                                                                                                                                                                                                                                                                                                                                                                                                                                                                |
| hCoV-19/USA/AK-PHL7911/2021       | EPI_ISL_1621174 | 4/2/2021  | Alaska State Virology Laboratory                    | Alaska State Virology Laboratory                                                             | Stephanie DeRonde, Elva House, Lisa Smith, Ph.D., Jack Chen, Ph.D.                                                                                                                                                                                                                                                                                                                                                                                                                                                                                                                                                                                                                                                                                                                                                                                                                                                                                                                                                                                |
| hCoV-19/USA/AK-PHL7934/2021       | EPI_ISL_1621186 | 4/7/2021  | Alaska State Virology Laboratory                    | Alaska State Virology Laboratory                                                             | Stephanie DeRonde, Elva House, Lisa Smith, Ph.D., Jack Chen, Ph.D.                                                                                                                                                                                                                                                                                                                                                                                                                                                                                                                                                                                                                                                                                                                                                                                                                                                                                                                                                                                |
| hCoV-19/USA/AK-PHL7938/2021       | EPI_ISL_1621187 | 4/5/2021  | Alaska State Virology Laboratory                    | Alaska State Virology Laboratory                                                             | Stephanie DeRonde, Elva House, Lisa Smith, Ph.D., Jack Chen, Ph.D.                                                                                                                                                                                                                                                                                                                                                                                                                                                                                                                                                                                                                                                                                                                                                                                                                                                                                                                                                                                |
| hCoV-19/USA/AK-PHL8260/2021       | EPI_ISL_1821899 | 4/20/2021 | Alaska State Virology Laboratory                    | Alaska State Virology Laboratory                                                             | Stephanie DeRonde, Elva House, Jacob Zidek, Lisa Smith, Ph.D., Jack Chen, Ph.D.                                                                                                                                                                                                                                                                                                                                                                                                                                                                                                                                                                                                                                                                                                                                                                                                                                                                                                                                                                   |
| hCoV-19/USA/AK-PHL8264/2021       | EPI_ISL_1821902 | 4/21/2021 | Alaska State Virology Laboratory                    | Alaska State Virology Laboratory                                                             | Stephanie DeRonde, Elva House, Jacob Zidek, Lisa Smith, Ph.D., Jack Chen, Ph.D.                                                                                                                                                                                                                                                                                                                                                                                                                                                                                                                                                                                                                                                                                                                                                                                                                                                                                                                                                                   |
| hCoV-19/USA/AK-PHL8266/2021       | EPI_ISL_1821903 | 4/20/2021 | Alaska State Virology Laboratory                    | Alaska State Virology Laboratory                                                             | Stephanie DeRonde, Elva House, Jacob Zidek, Lisa Smith, Ph.D., Jack Chen, Ph.D.                                                                                                                                                                                                                                                                                                                                                                                                                                                                                                                                                                                                                                                                                                                                                                                                                                                                                                                                                                   |
| hCoV-19/USA/AK-PHL8268/2021       | EPI_ISL_1821904 | 4/18/2021 | Alaska State Virology Laboratory                    | Alaska State Virology Laboratory                                                             | Stephanie DeRonde, Elva House, Jacob Zidek, Lisa Smith, Ph.D., Jack Chen, Ph.D.                                                                                                                                                                                                                                                                                                                                                                                                                                                                                                                                                                                                                                                                                                                                                                                                                                                                                                                                                                   |
| hCoV-19/USA/AK-PHL8277/2021       | EPI_ISL_1821913 | 4/19/2021 | Alaska State Virology Laboratory                    | Alaska State Virology Laboratory                                                             | Stephanie DeRonde, Elva House, Jacob Zidek, Lisa Smith, Ph.D., Jack Chen, Ph.D.                                                                                                                                                                                                                                                                                                                                                                                                                                                                                                                                                                                                                                                                                                                                                                                                                                                                                                                                                                   |
| hCoV-19/USA/AK-CDC-2-4242683/2021 | EPI_ISL_1823939 | 4/7/2021  | AK State Public Health Lab, State Health Department | Centers for Disease Control and Prevention<br>Division of Viral Diseases, Pathogen Discovery | Milli Sheth, Sarah Nobles, Jasmine Padilla, Mark Burroughs, Shoshona Le, Katie Dillon, Peter Cook, Clinton R. Paden, Dhvani Batra, Krista Queen, Kristen Knipe, Dakota Howard, Yvette Unoarumhi, Darlene Wagner, Matthew Schmerer, Ben L. Rambo-Martin, Kristine Lacek, Sam Shepard, Alison Lauffer Halpin, Dave Wentworth, Vivien Dugan, Suxiang Tong, Justin Lee                                                                                                                                                                                                                                                                                                                                                                                                                                                                                                                                                                                                                                                                                |
| hCoV-19/USA/AK-PHL7473/2021       | EPI_ISL_1652210 | 3/6/2021  | Alaska State Virology Laboratory                    | Alaska State Virology Laboratory                                                             | Stephanie DeRonde, Elva House, Lisa Smith, Ph.D., Jack Chen, Ph.D.                                                                                                                                                                                                                                                                                                                                                                                                                                                                                                                                                                                                                                                                                                                                                                                                                                                                                                                                                                                |

|                                      |                 |           |                                  |                                                                                              |                                                                                                                                                                                                                                                                                                                                                                                                                                     |
|--------------------------------------|-----------------|-----------|----------------------------------|----------------------------------------------------------------------------------------------|-------------------------------------------------------------------------------------------------------------------------------------------------------------------------------------------------------------------------------------------------------------------------------------------------------------------------------------------------------------------------------------------------------------------------------------|
| hCoV-19/USA/AK-PHL7482/2021          | EPI_ISL_1652218 | 3/6/2021  | Alaska State Virology Laboratory | Alaska State Virology Laboratory                                                             | Stephanie DeRonde, Elva House, Lisa Smith, Ph.D., Jack Chen, Ph.D.                                                                                                                                                                                                                                                                                                                                                                  |
| hCoV-19/USA/AK-PHL7483/2021          | EPI_ISL_1652219 | 3/6/2021  | Alaska State Virology Laboratory | Alaska State Virology Laboratory                                                             | Stephanie DeRonde, Elva House, Lisa Smith, Ph.D., Jack Chen, Ph.D.                                                                                                                                                                                                                                                                                                                                                                  |
| hCoV-19/USA/AK-PHL7488/2021          | EPI_ISL_1652223 | 3/6/2021  | Alaska State Virology Laboratory | Alaska State Virology Laboratory                                                             | Stephanie DeRonde, Elva House, Lisa Smith, Ph.D., Jack Chen, Ph.D.                                                                                                                                                                                                                                                                                                                                                                  |
| hCoV-19/USA/AK-PHL7492/2021          | EPI_ISL_1652226 | 3/6/2021  | Alaska State Virology Laboratory | Alaska State Virology Laboratory                                                             | Stephanie DeRonde, Elva House, Lisa Smith, Ph.D., Jack Chen, Ph.D.                                                                                                                                                                                                                                                                                                                                                                  |
| hCoV-19/USA/AK-PHL7499/2021          | EPI_ISL_1652231 | 3/6/2021  | Alaska State Virology Laboratory | Alaska State Virology Laboratory                                                             | Stephanie DeRonde, Elva House, Lisa Smith, Ph.D., Jack Chen, Ph.D.                                                                                                                                                                                                                                                                                                                                                                  |
| hCoV-19/USA/AK-PHL7500/2021          | EPI_ISL_1652232 | 3/5/2021  | Alaska State Virology Laboratory | Alaska State Virology Laboratory                                                             | Stephanie DeRonde, Elva House, Lisa Smith, Ph.D., Jack Chen, Ph.D.                                                                                                                                                                                                                                                                                                                                                                  |
| hCoV-19/USA/AK-PHL7502/2021          | EPI_ISL_1652233 | 3/5/2021  | Alaska State Virology Laboratory | Alaska State Virology Laboratory                                                             | Stephanie DeRonde, Elva House, Lisa Smith, Ph.D., Jack Chen, Ph.D.                                                                                                                                                                                                                                                                                                                                                                  |
| hCoV-19/USA/AK-PHL8068/2021          | EPI_ISL_1754873 | 4/9/2021  | Alaska State Virology Laboratory | Alaska State Virology Laboratory                                                             | Stephanie DeRonde, Elva House, Lisa Smith, Ph.D., Jack Chen, Ph.D.                                                                                                                                                                                                                                                                                                                                                                  |
| hCoV-19/USA/AK-PHL8083/2021          | EPI_ISL_1754882 | 4/10/2021 | Alaska State Virology Laboratory | Alaska State Virology Laboratory                                                             | Stephanie DeRonde, Elva House, Lisa Smith, Ph.D., Jack Chen, Ph.D.                                                                                                                                                                                                                                                                                                                                                                  |
| hCoV-19/USA/AK-PHL8084/2021          | EPI_ISL_1754883 | 4/6/2021  | Alaska State Virology Laboratory | Alaska State Virology Laboratory                                                             | Stephanie DeRonde, Elva House, Lisa Smith, Ph.D., Jack Chen, Ph.D.                                                                                                                                                                                                                                                                                                                                                                  |
| hCoV-19/USA/AK-PHL8086/2021          | EPI_ISL_1754885 | 4/11/2021 | Alaska State Virology Laboratory | Alaska State Virology Laboratory                                                             | Stephanie DeRonde, Elva House, Lisa Smith, Ph.D., Jack Chen, Ph.D.                                                                                                                                                                                                                                                                                                                                                                  |
| hCoV-19/USA/AK-PHL8087/2021          | EPI_ISL_1754886 | 4/13/2021 | Alaska State Virology Laboratory | Alaska State Virology Laboratory                                                             | Stephanie DeRonde, Elva House, Lisa Smith, Ph.D., Jack Chen, Ph.D.                                                                                                                                                                                                                                                                                                                                                                  |
| hCoV-19/USA/AK-PHL8091/2021          | EPI_ISL_1754890 | 4/6/2021  | Alaska State Virology Laboratory | Alaska State Virology Laboratory                                                             | Stephanie DeRonde, Elva House, Lisa Smith, Ph.D., Jack Chen, Ph.D.                                                                                                                                                                                                                                                                                                                                                                  |
| hCoV-19/USA/AK-PHL8098/2021          | EPI_ISL_1754893 | 4/11/2021 | Alaska State Virology Laboratory | Alaska State Virology Laboratory                                                             | Stephanie DeRonde, Elva House, Lisa Smith, Ph.D., Jack Chen, Ph.D.                                                                                                                                                                                                                                                                                                                                                                  |
| hCoV-19/USA/AK-CDC-ASC210041461/2021 | EPI_ISL_1835211 | 4/1/2021  | Aegis Sciences Corporation       | Centers for Disease Control and Prevention<br>Division of Viral Diseases, Pathogen Discovery | Dakota Howard, Dhvani Batra, Peter W. Cook, Kara Moser, Adrian Paskey, Jason Caravas, Benjamin Rambo-Martin, Shatavia Morrison, Christopher Gulvick, Scott Sammons, Yvette Unoarumhi, Darlene Wagner, Matthew Schmeier, Cyndi Clark, Patrick Campbell, Rob Case, Vikramsinha Ghorpade, Holly Houdeshell, Ola Kvalvaag, Dillon Nall, Ethan Sanders, Alec Vest, Shaun Westlund, Matthew Hardison, Clinton R. Paden, Duncan MacCannell |
| hCoV-19/USA/AK-CDC-ASC210041460/2021 | EPI_ISL_1835210 | 4/1/2021  | Aegis Sciences Corporation       | Centers for Disease Control and Prevention<br>Division of Viral Diseases, Pathogen Discovery | Dakota Howard, Dhvani Batra, Peter W. Cook, Kara Moser, Adrian Paskey, Jason Caravas, Benjamin Rambo-Martin, Shatavia Morrison, Christopher Gulvick, Scott Sammons, Yvette Unoarumhi, Darlene Wagner, Matthew Schmeier, Cyndi Clark, Patrick Campbell, Rob Case, Vikramsinha Ghorpade, Holly Houdeshell, Ola Kvalvaag, Dillon Nall, Ethan Sanders, Alec Vest, Shaun Westlund, Matthew Hardison, Clinton R. Paden, Duncan MacCannell |
| hCoV-19/USA/AK-PHL7583/2021          | EPI_ISL_1483596 | 3/13/2021 | Alaska State Virology Laboratory | Alaska State Virology Laboratory                                                             | Stephanie DeRonde, Elva House, Lisa Smith, Ph.D., Jack Chen, Ph.D.                                                                                                                                                                                                                                                                                                                                                                  |
| hCoV-19/USA/AK-PHL7700/2021          | EPI_ISL_1483656 | 3/20/2021 | Alaska State Virology Laboratory | Alaska State Virology Laboratory                                                             | Stephanie DeRonde, Elva House, Lisa Smith, Ph.D., Jack Chen, Ph.D.                                                                                                                                                                                                                                                                                                                                                                  |
| hCoV-19/USA/AK-PHL7751/2021          | EPI_ISL_1483685 | 3/25/2021 | Alaska State Virology Laboratory | Alaska State Virology Laboratory                                                             | Stephanie DeRonde, Elva House, Lisa Smith, Ph.D., Jack Chen, Ph.D.                                                                                                                                                                                                                                                                                                                                                                  |
| hCoV-19/USA/AK-PHL7220/2021          | EPI_ISL_1195944 | 2/16/2021 | Alaska State Virology Laboratory | Alaska State Virology Laboratory                                                             | Stephanie DeRonde, Elva House, Lisa Smith, Ph.D., Jack Chen, Ph.D.                                                                                                                                                                                                                                                                                                                                                                  |
| hCoV-19/USA/AK-PHL7358/2021          | EPI_ISL_1195998 | 2/20/2021 | Alaska State Virology Laboratory | Alaska State Virology Laboratory                                                             | Stephanie DeRonde, Elva House, Lisa Smith, Ph.D., Jack Chen, Ph.D.                                                                                                                                                                                                                                                                                                                                                                  |
| hCoV-19/USA/AK-CDC-ASC210028420/2021 | EPI_ISL_1687563 | 3/30/2021 | Aegis Sciences Corporation       | Centers for Disease Control and Prevention<br>Division of Viral Diseases, Pathogen Discovery | Dakota Howard, Dhvani Batra, Peter W. Cook, Kara Moser, Adrian Paskey, Jason Caravas, Benjamin Rambo-Martin, Shatavia Morrison, Christopher Gulvick, Scott Sammons, Yvette Unoarumhi, Darlene Wagner, Matthew Schmeier, Cyndi Clark, Patrick Campbell, Rob Case, Vikramsinha Ghorpade, Holly Houdeshell, Ola Kvalvaag, Dillon Nall, Ethan Sanders, Alec Vest, Shaun Westlund, Matthew Hardison, Clinton R. Paden, Duncan MacCannell |
| hCoV-19/USA/AK-PHL8040/2021          | EPI_ISL_1701698 | 3/26/2021 | Alaska State Virology Laboratory | Alaska State Virology Laboratory                                                             | Stephanie DeRonde, Elva House, Lisa Smith, Ph.D., Jack Chen, Ph.D.                                                                                                                                                                                                                                                                                                                                                                  |
| hCoV-19/USA/AK-PHL8018/2021          | EPI_ISL_1701684 | 4/5/2021  | Alaska State Virology Laboratory | Alaska State Virology Laboratory                                                             | Stephanie DeRonde, Elva House, Lisa Smith, Ph.D., Jack Chen, Ph.D.                                                                                                                                                                                                                                                                                                                                                                  |
| hCoV-19/USA/AK-PHL8020/2021          | EPI_ISL_1701686 | 4/5/2021  | Alaska State Virology Laboratory | Alaska State Virology Laboratory                                                             | Stephanie DeRonde, Elva House, Lisa Smith, Ph.D., Jack Chen, Ph.D.                                                                                                                                                                                                                                                                                                                                                                  |
| hCoV-19/USA/AK-PHL8022/2021          | EPI_ISL_1701688 | 4/6/2021  | Alaska State Virology Laboratory | Alaska State Virology Laboratory                                                             | Stephanie DeRonde, Elva House, Lisa Smith, Ph.D., Jack Chen, Ph.D.                                                                                                                                                                                                                                                                                                                                                                  |
| hCoV-19/USA/AK-PHL8024/2021          | EPI_ISL_1701690 | 4/6/2021  | Alaska State Virology Laboratory | Alaska State Virology Laboratory                                                             | Stephanie DeRonde, Elva House, Lisa Smith, Ph.D., Jack Chen, Ph.D.                                                                                                                                                                                                                                                                                                                                                                  |
| hCoV-19/USA/AK-PHL8028/2021          | EPI_ISL_1701691 | 4/6/2021  | Alaska State Virology Laboratory | Alaska State Virology Laboratory                                                             | Stephanie DeRonde, Elva House, Lisa Smith, Ph.D., Jack Chen, Ph.D.                                                                                                                                                                                                                                                                                                                                                                  |
| hCoV-19/USA/AK-PHL8033/2021          | EPI_ISL_1701694 | 3/4/2021  | Alaska State Virology Laboratory | Alaska State Virology Laboratory                                                             | Stephanie DeRonde, Elva House, Lisa Smith, Ph.D., Jack Chen, Ph.D.                                                                                                                                                                                                                                                                                                                                                                  |
| hCoV-19/USA/AK-PHL8035/2021          | EPI_ISL_1701695 | 3/26/2021 | Alaska State Virology Laboratory | Alaska State Virology Laboratory                                                             | Stephanie DeRonde, Elva House, Lisa Smith, Ph.D., Jack Chen, Ph.D.                                                                                                                                                                                                                                                                                                                                                                  |
| hCoV-19/USA/AK-PHL8038/2021          | EPI_ISL_1701697 | 3/26/2021 | Alaska State Virology Laboratory | Alaska State Virology Laboratory                                                             | Stephanie DeRonde, Elva House, Lisa Smith, Ph.D., Jack Chen, Ph.D.                                                                                                                                                                                                                                                                                                                                                                  |
| hCoV-19/USA/AK-PHL8049/2021          | EPI_ISL_1701707 | 4/13/2021 | Alaska State Virology Laboratory | Alaska State Virology Laboratory                                                             | Stephanie DeRonde, Elva House, Lisa Smith, Ph.D., Jack Chen, Ph.D.                                                                                                                                                                                                                                                                                                                                                                  |
| hCoV-19/USA/AK-PHL8057/2021          | EPI_ISL_1701714 | 4/14/2021 | Alaska State Virology Laboratory | Alaska State Virology Laboratory                                                             | Stephanie DeRonde, Elva House, Lisa Smith, Ph.D., Jack Chen, Ph.D.                                                                                                                                                                                                                                                                                                                                                                  |









|                                       |                 |            |                                                     |                                                                                                                            |                                                                                                                                                                                                                                                                                                                                                                                                                                                                                                                                                                                                  |
|---------------------------------------|-----------------|------------|-----------------------------------------------------|----------------------------------------------------------------------------------------------------------------------------|--------------------------------------------------------------------------------------------------------------------------------------------------------------------------------------------------------------------------------------------------------------------------------------------------------------------------------------------------------------------------------------------------------------------------------------------------------------------------------------------------------------------------------------------------------------------------------------------------|
| hCoV-19/USA/AK-PHL7852/2021           | EPI_ISL_1575073 | 3/30/2021  | Alaska State Virology Laboratory                    | Alaska State Virology Laboratory                                                                                           | Stephanie DeRonde, Elva House, Lisa Smith, Ph.D., Jack Chen, Ph.D.                                                                                                                                                                                                                                                                                                                                                                                                                                                                                                                               |
| hCoV-19/USA/AK-PHL7814/2021           | EPI_ISL_1575037 | 3/30/2021  | Alaska State Virology Laboratory                    | Alaska State Virology Laboratory                                                                                           | Stephanie DeRonde, Elva House, Lisa Smith, Ph.D., Jack Chen, Ph.D.                                                                                                                                                                                                                                                                                                                                                                                                                                                                                                                               |
| hCoV-19/USA/AK-PHL7815/2021           | EPI_ISL_1575038 | 3/30/2021  | Alaska State Virology Laboratory                    | Alaska State Virology Laboratory                                                                                           | Stephanie DeRonde, Elva House, Lisa Smith, Ph.D., Jack Chen, Ph.D.                                                                                                                                                                                                                                                                                                                                                                                                                                                                                                                               |
| hCoV-19/USA/AK-PHL7816/2021           | EPI_ISL_1575039 | 3/31/2021  | Alaska State Virology Laboratory                    | Alaska State Virology Laboratory                                                                                           | Stephanie DeRonde, Elva House, Lisa Smith, Ph.D., Jack Chen, Ph.D.                                                                                                                                                                                                                                                                                                                                                                                                                                                                                                                               |
| hCoV-19/USA/AK-PHL7819/2021           | EPI_ISL_1575041 | 3/28/2021  | Alaska State Virology Laboratory                    | Alaska State Virology Laboratory                                                                                           | Stephanie DeRonde, Elva House, Lisa Smith, Ph.D., Jack Chen, Ph.D.                                                                                                                                                                                                                                                                                                                                                                                                                                                                                                                               |
| hCoV-19/USA/AK-PHL7820/2021           | EPI_ISL_1575042 | 3/31/2021  | Alaska State Virology Laboratory                    | Alaska State Virology Laboratory                                                                                           | Stephanie DeRonde, Elva House, Lisa Smith, Ph.D., Jack Chen, Ph.D.                                                                                                                                                                                                                                                                                                                                                                                                                                                                                                                               |
| hCoV-19/USA/AK-PHL7855/2021           | EPI_ISL_1575076 | 3/30/2021  | Alaska State Virology Laboratory                    | Alaska State Virology Laboratory                                                                                           | Stephanie DeRonde, Elva House, Lisa Smith, Ph.D., Jack Chen, Ph.D.                                                                                                                                                                                                                                                                                                                                                                                                                                                                                                                               |
| hCoV-19/USA/AK-PHL7856/2021           | EPI_ISL_1575077 | 3/30/2021  | Alaska State Virology Laboratory                    | Alaska State Virology Laboratory                                                                                           | Stephanie DeRonde, Elva House, Lisa Smith, Ph.D., Jack Chen, Ph.D.                                                                                                                                                                                                                                                                                                                                                                                                                                                                                                                               |
| hCoV-19/USA/AK-PHL7767/2021           | EPI_ISL_1575081 | 3/26/2021  | Alaska State Virology Laboratory                    | Alaska State Virology Laboratory                                                                                           | Stephanie DeRonde, Elva House, Lisa Smith, Ph.D., Jack Chen, Ph.D.                                                                                                                                                                                                                                                                                                                                                                                                                                                                                                                               |
| hCoV-19/USA/AK-PHL7769/2021           | EPI_ISL_1575083 | 3/25/2021  | Alaska State Virology Laboratory                    | Alaska State Virology Laboratory                                                                                           | Stephanie DeRonde, Elva House, Lisa Smith, Ph.D., Jack Chen, Ph.D.                                                                                                                                                                                                                                                                                                                                                                                                                                                                                                                               |
| hCoV-19/USA/AK-PHL7774/2021           | EPI_ISL_1575086 | 3/26/2021  | Alaska State Virology Laboratory                    | Alaska State Virology Laboratory                                                                                           | Stephanie DeRonde, Elva House, Lisa Smith, Ph.D., Jack Chen, Ph.D.                                                                                                                                                                                                                                                                                                                                                                                                                                                                                                                               |
| hCoV-19/USA/AK-PHL7783/2021           | EPI_ISL_1575091 | 3/25/2021  | Alaska State Virology Laboratory                    | Alaska State Virology Laboratory                                                                                           | Stephanie DeRonde, Elva House, Lisa Smith, Ph.D., Jack Chen, Ph.D.                                                                                                                                                                                                                                                                                                                                                                                                                                                                                                                               |
| hCoV-19/USA/AK-PHL7784/2021           | EPI_ISL_1575092 | 3/26/2021  | Alaska State Virology Laboratory                    | Alaska State Virology Laboratory                                                                                           | Stephanie DeRonde, Elva House, Lisa Smith, Ph.D., Jack Chen, Ph.D.                                                                                                                                                                                                                                                                                                                                                                                                                                                                                                                               |
| hCoV-19/USA/AK-PHL7786/2021           | EPI_ISL_1575094 | 3/25/2021  | Alaska State Virology Laboratory                    | Alaska State Virology Laboratory                                                                                           | Stephanie DeRonde, Elva House, Lisa Smith, Ph.D., Jack Chen, Ph.D.                                                                                                                                                                                                                                                                                                                                                                                                                                                                                                                               |
| hCoV-19/USA/AK-PHL7790/2021           | EPI_ISL_1575097 | 3/30/2021  | Alaska State Virology Laboratory                    | Alaska State Virology Laboratory                                                                                           | Stephanie DeRonde, Elva House, Lisa Smith, Ph.D., Jack Chen, Ph.D.                                                                                                                                                                                                                                                                                                                                                                                                                                                                                                                               |
| hCoV-19/USA/AK-PHL7794/2021           | EPI_ISL_1575099 | 3/29/2021  | Alaska State Virology Laboratory                    | Alaska State Virology Laboratory                                                                                           | Stephanie DeRonde, Elva House, Lisa Smith, Ph.D., Jack Chen, Ph.D.                                                                                                                                                                                                                                                                                                                                                                                                                                                                                                                               |
| hCoV-19/USA/AK-PHL7795/2021           | EPI_ISL_1575100 | 3/29/2021  | Alaska State Virology Laboratory                    | Alaska State Virology Laboratory                                                                                           | Stephanie DeRonde, Elva House, Lisa Smith, Ph.D., Jack Chen, Ph.D.                                                                                                                                                                                                                                                                                                                                                                                                                                                                                                                               |
| hCoV-19/USA/AK-PHL7796/2021           | EPI_ISL_1575101 | 3/29/2021  | Alaska State Virology Laboratory                    | Alaska State Virology Laboratory                                                                                           | Stephanie DeRonde, Elva House, Lisa Smith, Ph.D., Jack Chen, Ph.D.                                                                                                                                                                                                                                                                                                                                                                                                                                                                                                                               |
| hCoV-19/USA/AK-PHL7797/2021           | EPI_ISL_1575102 | 3/29/2021  | Alaska State Virology Laboratory                    | Alaska State Virology Laboratory                                                                                           | Stephanie DeRonde, Elva House, Lisa Smith, Ph.D., Jack Chen, Ph.D.                                                                                                                                                                                                                                                                                                                                                                                                                                                                                                                               |
| hCoV-19/USA/AK-PHL7798/2021           | EPI_ISL_1575103 | 3/29/2021  | Alaska State Virology Laboratory                    | Alaska State Virology Laboratory                                                                                           | Stephanie DeRonde, Elva House, Lisa Smith, Ph.D., Jack Chen, Ph.D.                                                                                                                                                                                                                                                                                                                                                                                                                                                                                                                               |
| hCoV-19/USA/AK-PHL7803/2021           | EPI_ISL_1575104 | 3/31/2021  | Alaska State Virology Laboratory                    | Alaska State Virology Laboratory                                                                                           | Stephanie DeRonde, Elva House, Lisa Smith, Ph.D., Jack Chen, Ph.D.                                                                                                                                                                                                                                                                                                                                                                                                                                                                                                                               |
| hCoV-19/USA/AK-CDC-STM-000004274/2021 | EPI_ISL_966629  | 1/22/2021  | Helix/Illumina                                      | Respiratory Viruses Branch, Division of Viral Diseases, Centers for Disease Control and Prevention                         | Peter W. Cook, Dakota Howard, Dhvani Batra, Ben L. Rambo-Martin, Eileen de Feo, Jan Antico, Christine Tran, Matthew Tolentino, Shannon Wickline, Kim Gietzen, Brad Sickler, Jingtao Liu, Eric Allen, Phil Febbo, Summer Galloway, Nicole L. Washington, Simon White, Geraint Levan, Kelly Schiabor Barrett, Elizabeth Cirulli, Alexandre Bolze, Ary Ascencio, Charlotte Rivera-Garcia, Ryan Cho, Jason Nguyen, Sherry Wang, Jimmy Ramirez, Tyler Cassens, Efren Sandoval, Magnus Isaksson, William Lee, David Becker, Marc Laurent, James Lu, Clinton R. Paden, Suxiang Tong, Duncan MacCannell, |
| hCoV-19/USA/AK-CDC-STM-000005026/2021 | EPI_ISL_967154  | 1/22/2021  | Helix/Illumina                                      | Respiratory Viruses Branch, Division of Viral Diseases, Centers for Disease Control and Prevention                         | Peter W. Cook, Dakota Howard, Dhvani Batra, Ben L. Rambo-Martin, Eileen de Feo, Jan Antico, Christine Tran, Matthew Tolentino, Shannon Wickline, Kim Gietzen, Brad Sickler, Jingtao Liu, Eric Allen, Phil Febbo, Summer Galloway, Nicole L. Washington, Simon White, Geraint Levan, Kelly Schiabor Barrett, Elizabeth Cirulli, Alexandre Bolze, Ary Ascencio, Charlotte Rivera-Garcia, Ryan Cho, Jason Nguyen, Sherry Wang, Jimmy Ramirez, Tyler Cassens, Efren Sandoval, Magnus Isaksson, William Lee, David Becker, Marc Laurent, James Lu, Clinton R. Paden, Suxiang Tong, Duncan MacCannell, |
| hCoV-19/USA/AK-CDC-STM-000003657/2021 | EPI_ISL_967496  | 1/18/2021  | Helix/Illumina                                      | Respiratory Viruses Branch, Division of Viral Diseases, Centers for Disease Control and Prevention                         | Peter W. Cook, Dakota Howard, Dhvani Batra, Ben L. Rambo-Martin, Eileen de Feo, Jan Antico, Christine Tran, Matthew Tolentino, Shannon Wickline, Kim Gietzen, Brad Sickler, Jingtao Liu, Eric Allen, Phil Febbo, Summer Galloway, Nicole L. Washington, Simon White, Geraint Levan, Kelly Schiabor Barrett, Elizabeth Cirulli, Alexandre Bolze, Ary Ascencio, Charlotte Rivera-Garcia, Ryan Cho, Jason Nguyen, Sherry Wang, Jimmy Ramirez, Tyler Cassens, Efren Sandoval, Magnus Isaksson, William Lee, David Becker, Marc Laurent, James Lu, Clinton R. Paden, Suxiang Tong, Duncan MacCannell, |
| hCoV-19/USA/AK-CDC-2-3920633/2020     | EPI_ISL_1225874 | 12/22/2020 | AK State Public Health Lab, State Health Department | Genomics and Discovery, Respiratory Viruses Branch, Division of Viral Diseases, Centers for Disease Control and Prevention | Krista Queen, Yan Li, Ying Tao, Jing Zhang, Anna Uehara, Anna Montmayer, Clinton R. Paden, Kristen Knipe, Matthew Schirmer, Shoshona Le, Katie Dillon, Peter W. Cook, Rachel Marine, Mili Sheth, Jasmine Padilla, Sarah Nobles, Mark Burroughs, Lori Rowe, Haibin Wang, Ben L. Rambo-Martin, Kristine Lacek, Sam Shepard, Dhvani Batra, Suxiang Tong, Justin Lee                                                                                                                                                                                                                                 |





|                                       |                 |            |                                                     |                                                                                                    |                                                                                                                                                                                                                                                                                                                                                                                                                                                                                                                                                                                                 |
|---------------------------------------|-----------------|------------|-----------------------------------------------------|----------------------------------------------------------------------------------------------------|-------------------------------------------------------------------------------------------------------------------------------------------------------------------------------------------------------------------------------------------------------------------------------------------------------------------------------------------------------------------------------------------------------------------------------------------------------------------------------------------------------------------------------------------------------------------------------------------------|
| hCoV-19/USA/AK-CDC-STM-000013926/2021 | EPI_ISL_1267794 | 2/12/2021  | Helix/Illumina                                      | Centers for Disease Control and Prevention<br>Division of Viral Diseases, Pathogen Discovery       | Peter W. Cook, Dakota Howard, Dhvani Batra, Ben L. Rambo-Martin, Eileen de Feo, Jan Antico, Christine Tran, Matthew Tolentino, Shannon Wickline, Kim Gietzen, Brad Sickler, Jingtao Liu, Eric Allen, Phil Febbo, Summer Galloway, Nicole L. Washington, Simon White, Geraint Levan, Kelly Schiabor Barrett, Elizabeth Cirulli, Alexandre Bolze, Ary Ascencio, Charlotte Rivera-Garcia, Ryan Cho, Jason Nguyen, Sherry Wang, Jimmy Ramirez, Tyler Cassens, Eflen Sandoval, Magnus Isaksson, William Lee, David Becker, Marc Laurent, James Lu, Clinton R. Paden, Suxiang Tong, Duncan MacCannell |
| hCoV-19/USA/AK-CDC-2-3980566/2021     | EPI_ISL_1272681 | 2/25/2021  | AK State Public Health Lab, State Health Department | Centers for Disease Control and Prevention<br>Division of Viral Diseases, Pathogen Discovery       | Krista Queen, Yan Li, Ying Tao, Jing Zhang, Anna Uehara, Anna Montmayeur, Clinton R. Paden, Kristen Knipe, Matthew Schmeier, Shoshona Le, Katie Dillon, Peter W. Cook, Rachel Marine, Mili Sheth, Jasmine Padilla, Sarah Nobles, Mark Burroughs, Lori Rowe, Haibin Wang, Ben L. Rambo-Martin, Kristine Lacek, Sam Shepard, Dhvani Batra, Suxiang Tong, Justin Lee                                                                                                                                                                                                                               |
| hCoV-19/USA/AK-CDC-2-3980468/2021     | EPI_ISL_1272682 | 2/22/2021  | AK State Public Health Lab, State Health Department | Centers for Disease Control and Prevention<br>Division of Viral Diseases, Pathogen Discovery       | Krista Queen, Yan Li, Ying Tao, Jing Zhang, Anna Uehara, Anna Montmayeur, Clinton R. Paden, Kristen Knipe, Matthew Schmeier, Shoshona Le, Katie Dillon, Peter W. Cook, Rachel Marine, Mili Sheth, Jasmine Padilla, Sarah Nobles, Mark Burroughs, Lori Rowe, Haibin Wang, Ben L. Rambo-Martin, Kristine Lacek, Sam Shepard, Dhvani Batra, Suxiang Tong, Justin Lee                                                                                                                                                                                                                               |
| hCoV-19/USA/AK-CDC-2-3980564/2021     | EPI_ISL_1272683 | 2/25/2021  | AK State Public Health Lab, State Health Department | Centers for Disease Control and Prevention<br>Division of Viral Diseases, Pathogen Discovery       | Krista Queen, Yan Li, Ying Tao, Jing Zhang, Anna Uehara, Anna Montmayeur, Clinton R. Paden, Kristen Knipe, Matthew Schmeier, Shoshona Le, Katie Dillon, Peter W. Cook, Rachel Marine, Mili Sheth, Jasmine Padilla, Sarah Nobles, Mark Burroughs, Lori Rowe, Haibin Wang, Ben L. Rambo-Martin, Kristine Lacek, Sam Shepard, Dhvani Batra, Suxiang Tong, Justin Lee                                                                                                                                                                                                                               |
| hCoV-19/USA/AK-CDC-2-3980558/2021     | EPI_ISL_1272684 | 2/22/2021  | AK State Public Health Lab, State Health Department | Centers for Disease Control and Prevention<br>Division of Viral Diseases, Pathogen Discovery       | Krista Queen, Yan Li, Ying Tao, Jing Zhang, Anna Uehara, Anna Montmayeur, Clinton R. Paden, Kristen Knipe, Matthew Schmeier, Shoshona Le, Katie Dillon, Peter W. Cook, Rachel Marine, Mili Sheth, Jasmine Padilla, Sarah Nobles, Mark Burroughs, Lori Rowe, Haibin Wang, Ben L. Rambo-Martin, Kristine Lacek, Sam Shepard, Dhvani Batra, Suxiang Tong, Justin Lee                                                                                                                                                                                                                               |
| hCoV-19/USA/AK-CDC-2-3980659/2021     | EPI_ISL_1272685 | 2/22/2021  | AK State Public Health Lab, State Health Department | Centers for Disease Control and Prevention<br>Division of Viral Diseases, Pathogen Discovery       | Krista Queen, Yan Li, Ying Tao, Jing Zhang, Anna Uehara, Anna Montmayeur, Clinton R. Paden, Kristen Knipe, Matthew Schmeier, Shoshona Le, Katie Dillon, Peter W. Cook, Rachel Marine, Mili Sheth, Jasmine Padilla, Sarah Nobles, Mark Burroughs, Lori Rowe, Haibin Wang, Ben L. Rambo-Martin, Kristine Lacek, Sam Shepard, Dhvani Batra, Suxiang Tong, Justin Lee                                                                                                                                                                                                                               |
| hCoV-19/USA/AK-CDC-2-3980479/2021     | EPI_ISL_1272686 | 2/23/2021  | AK State Public Health Lab, State Health Department | Centers for Disease Control and Prevention<br>Division of Viral Diseases, Pathogen Discovery       | Krista Queen, Yan Li, Ying Tao, Jing Zhang, Anna Uehara, Anna Montmayeur, Clinton R. Paden, Kristen Knipe, Matthew Schmeier, Shoshona Le, Katie Dillon, Peter W. Cook, Rachel Marine, Mili Sheth, Jasmine Padilla, Sarah Nobles, Mark Burroughs, Lori Rowe, Haibin Wang, Ben L. Rambo-Martin, Kristine Lacek, Sam Shepard, Dhvani Batra, Suxiang Tong, Justin Lee                                                                                                                                                                                                                               |
| hCoV-19/USA/AK-CDC-2-3980561/2021     | EPI_ISL_1272687 | 2/22/2021  | AK State Public Health Lab, State Health Department | Centers for Disease Control and Prevention<br>Division of Viral Diseases, Pathogen Discovery       | Krista Queen, Yan Li, Ying Tao, Jing Zhang, Anna Uehara, Anna Montmayeur, Clinton R. Paden, Kristen Knipe, Matthew Schmeier, Shoshona Le, Katie Dillon, Peter W. Cook, Rachel Marine, Mili Sheth, Jasmine Padilla, Sarah Nobles, Mark Burroughs, Lori Rowe, Haibin Wang, Ben L. Rambo-Martin, Kristine Lacek, Sam Shepard, Dhvani Batra, Suxiang Tong, Justin Lee                                                                                                                                                                                                                               |
| hCoV-19/USA/AK-CDC-2-3980499/2021     | EPI_ISL_1272688 | 2/22/2021  | AK State Public Health Lab, State Health Department | Centers for Disease Control and Prevention<br>Division of Viral Diseases, Pathogen Discovery       | Krista Queen, Yan Li, Ying Tao, Jing Zhang, Anna Uehara, Anna Montmayeur, Clinton R. Paden, Kristen Knipe, Matthew Schmeier, Shoshona Le, Katie Dillon, Peter W. Cook, Rachel Marine, Mili Sheth, Jasmine Padilla, Sarah Nobles, Mark Burroughs, Lori Rowe, Haibin Wang, Ben L. Rambo-Martin, Kristine Lacek, Sam Shepard, Dhvani Batra, Suxiang Tong, Justin Lee                                                                                                                                                                                                                               |
| hCoV-19/USA/AK-CDC-LC0000711/2020     | EPI_ISL_1028447 | 12/21/2020 | Laboratory Corporation of America                   | Respiratory Viruses Branch, Division of Viral Diseases, Centers for Disease Control and Prevention | Peter W. Cook, Dakota Howard, Dhvani Batra, Ben L. Rambo-Martin, Clinton R. Paden, Suxiang Tong, Duncan MacCannell                                                                                                                                                                                                                                                                                                                                                                                                                                                                              |
| hCoV-19/USA/AK-CDC-LC0009308/2021     | EPI_ISL_1031423 | 1/23/2021  | Laboratory Corporation of America                   | Respiratory Viruses Branch, Division of Viral Diseases, Centers for Disease Control and Prevention | Peter W. Cook, Dakota Howard, Dhvani Batra, Ben L. Rambo-Martin, Clinton R. Paden, Suxiang Tong, Duncan MacCannell                                                                                                                                                                                                                                                                                                                                                                                                                                                                              |
| hCoV-19/USA/AK-CDC-LC0012094/2021     | EPI_ISL_1037676 | 1/29/2021  | Laboratory Corporation of America                   | Respiratory Viruses Branch, Division of Viral Diseases, Centers for Disease Control and Prevention | Peter W. Cook, Dakota Howard, Dhvani Batra, Ben L. Rambo-Martin, Clinton R. Paden, Suxiang Tong, Duncan MacCannell                                                                                                                                                                                                                                                                                                                                                                                                                                                                              |
| hCoV-19/USA/AK-CDC-LC0011667/2021     | EPI_ISL_1038553 | 1/29/2021  | Laboratory Corporation of America                   | Respiratory Viruses Branch, Division of Viral Diseases, Centers for Disease Control and Prevention | Peter W. Cook, Dakota Howard, Dhvani Batra, Ben L. Rambo-Martin, Clinton R. Paden, Suxiang Tong, Duncan MacCannell                                                                                                                                                                                                                                                                                                                                                                                                                                                                              |

|                                     |                 |           |                                                     |                                                                                                    |                                                                                                                                                                                                                                                                                                               |
|-------------------------------------|-----------------|-----------|-----------------------------------------------------|----------------------------------------------------------------------------------------------------|---------------------------------------------------------------------------------------------------------------------------------------------------------------------------------------------------------------------------------------------------------------------------------------------------------------|
| hCoV-19/USA/AK-CDC-QDX21803543/2021 | EPI_ISL_1091028 | 2/5/2021  | Quest Diagnostics Incorporated                      | Respiratory Viruses Branch, Division of Viral Diseases, Centers for Disease Control and Prevention | Peter W. Cook, Dakota Howard, Dhvani Batra, Ben L. Rambo-Martin, S. H. Rosenthal, A. Gerasimova, R. M. Kagan, B. Anderson, M. Hua, Y. Liu, L.E. Bernstein, K.E. Livingston, A. Perez, I. A. Shlyakhter, R. V. Rolando, R. Owen, P. Tanpaiboon, F. Lacbawan, Clinton R. Paden, Suxiang Tong, Duncan MacCannell |
| hCoV-19/USA/AK-CDC-QDX21804109/2021 | EPI_ISL_1091062 | 2/4/2021  | Quest Diagnostics Incorporated                      | Respiratory Viruses Branch, Division of Viral Diseases, Centers for Disease Control and Prevention | Peter W. Cook, Dakota Howard, Dhvani Batra, Ben L. Rambo-Martin, S. H. Rosenthal, A. Gerasimova, R. M. Kagan, B. Anderson, M. Hua, Y. Liu, L.E. Bernstein, K.E. Livingston, A. Perez, I. A. Shlyakhter, R. V. Rolando, R. Owen, P. Tanpaiboon, F. Lacbawan, Clinton R. Paden, Suxiang Tong, Duncan MacCannell |
| hCoV-19/USA/AK-CDC-QDX21803962/2021 | EPI_ISL_1091064 | 2/4/2021  | Quest Diagnostics Incorporated                      | Respiratory Viruses Branch, Division of Viral Diseases, Centers for Disease Control and Prevention | Peter W. Cook, Dakota Howard, Dhvani Batra, Ben L. Rambo-Martin, S. H. Rosenthal, A. Gerasimova, R. M. Kagan, B. Anderson, M. Hua, Y. Liu, L.E. Bernstein, K.E. Livingston, A. Perez, I. A. Shlyakhter, R. V. Rolando, R. Owen, P. Tanpaiboon, F. Lacbawan, Clinton R. Paden, Suxiang Tong, Duncan MacCannell |
| hCoV-19/USA/AK-CDC-QDX21803856/2021 | EPI_ISL_1091077 | 2/4/2021  | Quest Diagnostics Incorporated                      | Respiratory Viruses Branch, Division of Viral Diseases, Centers for Disease Control and Prevention | Peter W. Cook, Dakota Howard, Dhvani Batra, Ben L. Rambo-Martin, S. H. Rosenthal, A. Gerasimova, R. M. Kagan, B. Anderson, M. Hua, Y. Liu, L.E. Bernstein, K.E. Livingston, A. Perez, I. A. Shlyakhter, R. V. Rolando, R. Owen, P. Tanpaiboon, F. Lacbawan, Clinton R. Paden, Suxiang Tong, Duncan MacCannell |
| hCoV-19/USA/AK-CDC-QDX21803437/2021 | EPI_ISL_1091080 | 2/4/2021  | Quest Diagnostics Incorporated                      | Respiratory Viruses Branch, Division of Viral Diseases, Centers for Disease Control and Prevention | Peter W. Cook, Dakota Howard, Dhvani Batra, Ben L. Rambo-Martin, S. H. Rosenthal, A. Gerasimova, R. M. Kagan, B. Anderson, M. Hua, Y. Liu, L.E. Bernstein, K.E. Livingston, A. Perez, I. A. Shlyakhter, R. V. Rolando, R. Owen, P. Tanpaiboon, F. Lacbawan, Clinton R. Paden, Suxiang Tong, Duncan MacCannell |
| hCoV-19/USA/AK-CDC-2-3845938/2021   | EPI_ISL_1094238 | 1/11/2021 | AK State Public Health Lab, State Health Department | Respiratory Viruses Branch, Division of Viral Diseases, Centers for Disease Control and Prevention | Krista Queen, Yan Li, Ying Tao, Jing Zhang, Anna Uehara, Anna Montmayer, Clinton R. Paden, Peter W. Cook, Rachel Marine, Mili Sheth, Jasmine Padilla, Sarah Nobles, Mark Burroughs, Lori Rowe, Haibin Wang, Ben L. Rambo-Martin, Dhvani Batra, Justin Lee, Suxiang Tong                                       |
| hCoV-19/USA/AK-CDC-2-3829823/2021   | EPI_ISL_1094272 | 1/4/2021  | AK State Public Health Lab, State Health Department | Respiratory Viruses Branch, Division of Viral Diseases, Centers for Disease Control and Prevention | Krista Queen, Yan Li, Ying Tao, Jing Zhang, Anna Uehara, Anna Montmayer, Clinton R. Paden, Peter W. Cook, Rachel Marine, Mili Sheth, Jasmine Padilla, Sarah Nobles, Mark Burroughs, Lori Rowe, Haibin Wang, Ben L. Rambo-Martin, Dhvani Batra, Justin Lee, Suxiang Tong                                       |
| hCoV-19/USA/AK-CDC-2-3845829/2021   | EPI_ISL_1094319 | 1/20/2021 | AK State Public Health Lab, State Health Department | Respiratory Viruses Branch, Division of Viral Diseases, Centers for Disease Control and Prevention | Krista Queen, Yan Li, Ying Tao, Jing Zhang, Anna Uehara, Anna Montmayer, Clinton R. Paden, Peter W. Cook, Rachel Marine, Mili Sheth, Jasmine Padilla, Sarah Nobles, Mark Burroughs, Lori Rowe, Haibin Wang, Ben L. Rambo-Martin, Dhvani Batra, Justin Lee, Suxiang Tong                                       |
| hCoV-19/USA/AK-CDC-2-3829838/2021   | EPI_ISL_1094353 | 1/6/2021  | AK State Public Health Lab, State Health Department | Respiratory Viruses Branch, Division of Viral Diseases, Centers for Disease Control and Prevention | Krista Queen, Yan Li, Ying Tao, Jing Zhang, Anna Uehara, Anna Montmayer, Clinton R. Paden, Peter W. Cook, Rachel Marine, Mili Sheth, Jasmine Padilla, Sarah Nobles, Mark Burroughs, Lori Rowe, Haibin Wang, Ben L. Rambo-Martin, Dhvani Batra, Justin Lee, Suxiang Tong                                       |
| hCoV-19/USA/AK-CDC-2-3829919/2021   | EPI_ISL_1094366 | 1/4/2021  | AK State Public Health Lab, State Health Department | Respiratory Viruses Branch, Division of Viral Diseases, Centers for Disease Control and Prevention | Krista Queen, Yan Li, Ying Tao, Jing Zhang, Anna Uehara, Anna Montmayer, Clinton R. Paden, Peter W. Cook, Rachel Marine, Mili Sheth, Jasmine Padilla, Sarah Nobles, Mark Burroughs, Lori Rowe, Haibin Wang, Ben L. Rambo-Martin, Dhvani Batra, Justin Lee, Suxiang Tong                                       |
| hCoV-19/USA/AK-CDC-2-3845936/2021   | EPI_ISL_1094380 | 1/11/2021 | AK State Public Health Lab, State Health Department | Respiratory Viruses Branch, Division of Viral Diseases, Centers for Disease Control and Prevention | Krista Queen, Yan Li, Ying Tao, Jing Zhang, Anna Uehara, Anna Montmayer, Clinton R. Paden, Peter W. Cook, Rachel Marine, Mili Sheth, Jasmine Padilla, Sarah Nobles, Mark Burroughs, Lori Rowe, Haibin Wang, Ben L. Rambo-Martin, Dhvani Batra, Justin Lee, Suxiang Tong                                       |
| hCoV-19/USA/AK-CDC-2-3829810/2021   | EPI_ISL_1094707 | 1/8/2021  | AK State Public Health Lab, State Health Department | Respiratory Viruses Branch, Division of Viral Diseases, Centers for Disease Control and Prevention | Krista Queen, Yan Li, Ying Tao, Jing Zhang, Anna Uehara, Anna Montmayer, Clinton R. Paden, Peter W. Cook, Rachel Marine, Mili Sheth, Jasmine Padilla, Sarah Nobles, Mark Burroughs, Lori Rowe, Haibin Wang, Ben L. Rambo-Martin, Dhvani Batra, Justin Lee, Suxiang Tong                                       |
| hCoV-19/USA/AK-CDC-2-3845943/2021   | EPI_ISL_1094708 | 1/12/2021 | AK State Public Health Lab, State Health Department | Respiratory Viruses Branch, Division of Viral Diseases, Centers for Disease Control and Prevention | Krista Queen, Yan Li, Ying Tao, Jing Zhang, Anna Uehara, Anna Montmayer, Clinton R. Paden, Peter W. Cook, Rachel Marine, Mili Sheth, Jasmine Padilla, Sarah Nobles, Mark Burroughs, Lori Rowe, Haibin Wang, Ben L. Rambo-Martin, Dhvani Batra, Justin Lee, Suxiang Tong                                       |
| hCoV-19/USA/AK-CDC-2-3845948/2021   | EPI_ISL_1094709 | 1/11/2021 | AK State Public Health Lab, State Health Department | Respiratory Viruses Branch, Division of Viral Diseases, Centers for Disease Control and Prevention | Krista Queen, Yan Li, Ying Tao, Jing Zhang, Anna Uehara, Anna Montmayer, Clinton R. Paden, Peter W. Cook, Rachel Marine, Mili Sheth, Jasmine Padilla, Sarah Nobles, Mark Burroughs, Lori Rowe, Haibin Wang, Ben L. Rambo-Martin, Dhvani Batra, Justin Lee, Suxiang Tong                                       |



|                                   |                 |           |                                                     |                                                                                                    |                                                                                                                                                                                                                                                                                                                                                                  |
|-----------------------------------|-----------------|-----------|-----------------------------------------------------|----------------------------------------------------------------------------------------------------|------------------------------------------------------------------------------------------------------------------------------------------------------------------------------------------------------------------------------------------------------------------------------------------------------------------------------------------------------------------|
| hCoV-19/USA/AK-CDC-2-3845906/2021 | EPI_ISL_1095231 | 1/12/2021 | AK State Public Health Lab, State Health Department | Respiratory Viruses Branch, Division of Viral Diseases, Centers for Disease Control and Prevention | Krista Queen, Yan Li, Ying Tao, Jing Zhang, Anna Uehara, Anna Montmayeur, Clinton R. Paden, Peter W. Cook, Rachel Marine, Mili Sheth, Jasmine Padilla, Sarah Nobles, Mark Burroughs, Lori Rowe, Haibin Wang, Ben L. Rambo-Martin, Dhvani Batra, Justin Lee, Suxiang Tong                                                                                         |
| hCoV-19/USA/AK-CDC-2-3845830/2021 | EPI_ISL_1095232 | 1/11/2021 | AK State Public Health Lab, State Health Department | Respiratory Viruses Branch, Division of Viral Diseases, Centers for Disease Control and Prevention | Krista Queen, Yan Li, Ying Tao, Jing Zhang, Anna Uehara, Anna Montmayeur, Clinton R. Paden, Peter W. Cook, Rachel Marine, Mili Sheth, Jasmine Padilla, Sarah Nobles, Mark Burroughs, Lori Rowe, Haibin Wang, Ben L. Rambo-Martin, Dhvani Batra, Justin Lee, Suxiang Tong                                                                                         |
| hCoV-19/USA/AK-CDC-2-4043715/2021 | EPI_ISL_1446651 | 3/8/2021  | AK State Public Health Lab, State Health Department | Centers for Disease Control and Prevention Division of Viral Diseases, Pathogen Discovery          | Mili Sheth, Sarah Nobles, Jasmine Padilla, Mark Burroughs, Shoshona Le, Katie Dillon, Peter Cook, Clinton R. Paden, Dhvani Batra, Krista Queen, Kristen Knipe, Dakota Howard, Yvette Unoarumhi, Darlene Wagner, Matthew Schmerer, Ben L. Rambo-Martin, Kristine Lacey, Sam Shepard, Alison Laufer Halpin, Dave Wentworth, Vivien Dugan, Suxiang Tong, Justin Lee |
| hCoV-19/USA/AK-CDC-2-4043723/2021 | EPI_ISL_1446653 | 3/7/2021  | AK State Public Health Lab, State Health Department | Centers for Disease Control and Prevention Division of Viral Diseases, Pathogen Discovery          | Mili Sheth, Sarah Nobles, Jasmine Padilla, Mark Burroughs, Shoshona Le, Katie Dillon, Peter Cook, Clinton R. Paden, Dhvani Batra, Krista Queen, Kristen Knipe, Dakota Howard, Yvette Unoarumhi, Darlene Wagner, Matthew Schmerer, Ben L. Rambo-Martin, Kristine Lacey, Sam Shepard, Alison Laufer Halpin, Dave Wentworth, Vivien Dugan, Suxiang Tong, Justin Lee |
| hCoV-19/USA/AK-CDC-2-4043812/2021 | EPI_ISL_1446654 | 3/2/2021  | AK State Public Health Lab, State Health Department | Centers for Disease Control and Prevention Division of Viral Diseases, Pathogen Discovery          | Mili Sheth, Sarah Nobles, Jasmine Padilla, Mark Burroughs, Shoshona Le, Katie Dillon, Peter Cook, Clinton R. Paden, Dhvani Batra, Krista Queen, Kristen Knipe, Dakota Howard, Yvette Unoarumhi, Darlene Wagner, Matthew Schmerer, Ben L. Rambo-Martin, Kristine Lacey, Sam Shepard, Alison Laufer Halpin, Dave Wentworth, Vivien Dugan, Suxiang Tong, Justin Lee |
| hCoV-19/USA/AK-CDC-2-4043831/2021 | EPI_ISL_1446655 | 3/8/2021  | AK State Public Health Lab, State Health Department | Centers for Disease Control and Prevention Division of Viral Diseases, Pathogen Discovery          | Mili Sheth, Sarah Nobles, Jasmine Padilla, Mark Burroughs, Shoshona Le, Katie Dillon, Peter Cook, Clinton R. Paden, Dhvani Batra, Krista Queen, Kristen Knipe, Dakota Howard, Yvette Unoarumhi, Darlene Wagner, Matthew Schmerer, Ben L. Rambo-Martin, Kristine Lacey, Sam Shepard, Alison Laufer Halpin, Dave Wentworth, Vivien Dugan, Suxiang Tong, Justin Lee |
| hCoV-19/USA/AK-CDC-2-4043725/2021 | EPI_ISL_1446656 | 3/7/2021  | AK State Public Health Lab, State Health Department | Centers for Disease Control and Prevention Division of Viral Diseases, Pathogen Discovery          | Mili Sheth, Sarah Nobles, Jasmine Padilla, Mark Burroughs, Shoshona Le, Katie Dillon, Peter Cook, Clinton R. Paden, Dhvani Batra, Krista Queen, Kristen Knipe, Dakota Howard, Yvette Unoarumhi, Darlene Wagner, Matthew Schmerer, Ben L. Rambo-Martin, Kristine Lacey, Sam Shepard, Alison Laufer Halpin, Dave Wentworth, Vivien Dugan, Suxiang Tong, Justin Lee |
| hCoV-19/USA/AK-CDC-2-4043830/2021 | EPI_ISL_1446657 | 3/7/2021  | AK State Public Health Lab, State Health Department | Centers for Disease Control and Prevention Division of Viral Diseases, Pathogen Discovery          | Mili Sheth, Sarah Nobles, Jasmine Padilla, Mark Burroughs, Shoshona Le, Katie Dillon, Peter Cook, Clinton R. Paden, Dhvani Batra, Krista Queen, Kristen Knipe, Dakota Howard, Yvette Unoarumhi, Darlene Wagner, Matthew Schmerer, Ben L. Rambo-Martin, Kristine Lacey, Sam Shepard, Alison Laufer Halpin, Dave Wentworth, Vivien Dugan, Suxiang Tong, Justin Lee |
| hCoV-19/USA/AK-CDC-2-4043822/2021 | EPI_ISL_1446658 | 3/8/2021  | AK State Public Health Lab, State Health Department | Centers for Disease Control and Prevention Division of Viral Diseases, Pathogen Discovery          | Mili Sheth, Sarah Nobles, Jasmine Padilla, Mark Burroughs, Shoshona Le, Katie Dillon, Peter Cook, Clinton R. Paden, Dhvani Batra, Krista Queen, Kristen Knipe, Dakota Howard, Yvette Unoarumhi, Darlene Wagner, Matthew Schmerer, Ben L. Rambo-Martin, Kristine Lacey, Sam Shepard, Alison Laufer Halpin, Dave Wentworth, Vivien Dugan, Suxiang Tong, Justin Lee |
| hCoV-19/USA/AK-CDC-2-4043750/2021 | EPI_ISL_1446659 | 3/1/2021  | AK State Public Health Lab, State Health Department | Centers for Disease Control and Prevention Division of Viral Diseases, Pathogen Discovery          | Mili Sheth, Sarah Nobles, Jasmine Padilla, Mark Burroughs, Shoshona Le, Katie Dillon, Peter Cook, Clinton R. Paden, Dhvani Batra, Krista Queen, Kristen Knipe, Dakota Howard, Yvette Unoarumhi, Darlene Wagner, Matthew Schmerer, Ben L. Rambo-Martin, Kristine Lacey, Sam Shepard, Alison Laufer Halpin, Dave Wentworth, Vivien Dugan, Suxiang Tong, Justin Lee |
| hCoV-19/USA/AK-CDC-2-4043726/2021 | EPI_ISL_1446660 | 3/6/2021  | AK State Public Health Lab, State Health Department | Centers for Disease Control and Prevention Division of Viral Diseases, Pathogen Discovery          | Mili Sheth, Sarah Nobles, Jasmine Padilla, Mark Burroughs, Shoshona Le, Katie Dillon, Peter Cook, Clinton R. Paden, Dhvani Batra, Krista Queen, Kristen Knipe, Dakota Howard, Yvette Unoarumhi, Darlene Wagner, Matthew Schmerer, Ben L. Rambo-Martin, Kristine Lacey, Sam Shepard, Alison Laufer Halpin, Dave Wentworth, Vivien Dugan, Suxiang Tong, Justin Lee |

|                                      |                 |           |                                                     |                                                                                              |                                                                                                                                                                                                                                                                                                                                                                                                                                     |
|--------------------------------------|-----------------|-----------|-----------------------------------------------------|----------------------------------------------------------------------------------------------|-------------------------------------------------------------------------------------------------------------------------------------------------------------------------------------------------------------------------------------------------------------------------------------------------------------------------------------------------------------------------------------------------------------------------------------|
| hCoV-19/USA/AK-CDC-2-4043744/2021    | EPI_ISL_1446661 | 3/9/2021  | AK State Public Health Lab, State Health Department | Centers for Disease Control and Prevention<br>Division of Viral Diseases, Pathogen Discovery | Mili Sheth, Sarah Nobles, Jasmine Padilla, Mark Burroughs, Shoshona Le, Katie Dillon, Peter Cook, Clinton R. Paden, Dhvani Batra, Krista Queen, Kristen Knipe, Dakota Howard, Yvette Unoarumhi, Darlene Wagner, Matthew Schmerer, Ben L. Rambo-Martin, Kristine Lacek, Sam Shepard, Alison Laufer Halpin, Dave Wentworth, Vivien Dugan, Suxiang Tong, Justin Lee                                                                    |
| hCoV-19/USA/AK-CDC-2-4043724/2021    | EPI_ISL_1446662 | 3/7/2021  | AK State Public Health Lab, State Health Department | Centers for Disease Control and Prevention<br>Division of Viral Diseases, Pathogen Discovery | Mili Sheth, Sarah Nobles, Jasmine Padilla, Mark Burroughs, Shoshona Le, Katie Dillon, Peter Cook, Clinton R. Paden, Dhvani Batra, Krista Queen, Kristen Knipe, Dakota Howard, Yvette Unoarumhi, Darlene Wagner, Matthew Schmerer, Ben L. Rambo-Martin, Kristine Lacek, Sam Shepard, Alison Laufer Halpin, Dave Wentworth, Vivien Dugan, Suxiang Tong, Justin Lee                                                                    |
| hCoV-19/USA/AK-CDC-2-4043844/2021    | EPI_ISL_1446664 | 3/9/2021  | AK State Public Health Lab, State Health Department | Centers for Disease Control and Prevention<br>Division of Viral Diseases, Pathogen Discovery | Mili Sheth, Sarah Nobles, Jasmine Padilla, Mark Burroughs, Shoshona Le, Katie Dillon, Peter Cook, Clinton R. Paden, Dhvani Batra, Krista Queen, Kristen Knipe, Dakota Howard, Yvette Unoarumhi, Darlene Wagner, Matthew Schmerer, Ben L. Rambo-Martin, Kristine Lacek, Sam Shepard, Alison Laufer Halpin, Dave Wentworth, Vivien Dugan, Suxiang Tong, Justin Lee                                                                    |
| hCoV-19/USA/AK-CDC-2-4043704/2021    | EPI_ISL_1446665 | 3/8/2021  | AK State Public Health Lab, State Health Department | Centers for Disease Control and Prevention<br>Division of Viral Diseases, Pathogen Discovery | Mili Sheth, Sarah Nobles, Jasmine Padilla, Mark Burroughs, Shoshona Le, Katie Dillon, Peter Cook, Clinton R. Paden, Dhvani Batra, Krista Queen, Kristen Knipe, Dakota Howard, Yvette Unoarumhi, Darlene Wagner, Matthew Schmerer, Ben L. Rambo-Martin, Kristine Lacek, Sam Shepard, Alison Laufer Halpin, Dave Wentworth, Vivien Dugan, Suxiang Tong, Justin Lee                                                                    |
| hCoV-19/USA/AK-CDC-2-4043823/2021    | EPI_ISL_1446666 | 3/6/2021  | AK State Public Health Lab, State Health Department | Centers for Disease Control and Prevention<br>Division of Viral Diseases, Pathogen Discovery | Mili Sheth, Sarah Nobles, Jasmine Padilla, Mark Burroughs, Shoshona Le, Katie Dillon, Peter Cook, Clinton R. Paden, Dhvani Batra, Krista Queen, Kristen Knipe, Dakota Howard, Yvette Unoarumhi, Darlene Wagner, Matthew Schmerer, Ben L. Rambo-Martin, Kristine Lacek, Sam Shepard, Alison Laufer Halpin, Dave Wentworth, Vivien Dugan, Suxiang Tong, Justin Lee                                                                    |
| hCoV-19/USA/AK-CDC-2-4043734/2021    | EPI_ISL_1446671 | 3/7/2021  | AK State Public Health Lab, State Health Department | Centers for Disease Control and Prevention<br>Division of Viral Diseases, Pathogen Discovery | Mili Sheth, Sarah Nobles, Jasmine Padilla, Mark Burroughs, Shoshona Le, Katie Dillon, Peter Cook, Clinton R. Paden, Dhvani Batra, Krista Queen, Kristen Knipe, Dakota Howard, Yvette Unoarumhi, Darlene Wagner, Matthew Schmerer, Ben L. Rambo-Martin, Kristine Lacek, Sam Shepard, Alison Laufer Halpin, Dave Wentworth, Vivien Dugan, Suxiang Tong, Justin Lee                                                                    |
| hCoV-19/USA/AK-CDC-ASC210006353/2021 | EPI_ISL_1479635 | 3/14/2021 | Aegis Sciences Corporation                          | Centers for Disease Control and Prevention<br>Division of Viral Diseases, Pathogen Discovery | Dakota Howard, Dhvani Batra, Peter W. Cook, Kara Moser, Adrian Paskey, Jason Caravas, Benjamin Rambo-Martin, Shatavia Morrison, Christopher Gulvick, Scott Sammons, Yvette Unoarumhi, Darlene Wagner, Matthew Schmerer, Cyndi Clark, Patrick Campbell, Rob Case, Vikramsinha Ghorpade, Holly Houdeshell, Ola Kvalvaag, Dillon Nall, Ethan Sanders, Alec Vest, Shaun Westlund, Matthew Hardison, Clinton R. Paden, Duncan MacCannell |
| hCoV-19/USA/AK-CDC-2-4043735/2021    | EPI_ISL_1446663 | 3/1/2021  | AK State Public Health Lab, State Health Department | Centers for Disease Control and Prevention<br>Division of Viral Diseases, Pathogen Discovery | Mili Sheth, Sarah Nobles, Jasmine Padilla, Mark Burroughs, Shoshona Le, Katie Dillon, Peter Cook, Clinton R. Paden, Dhvani Batra, Krista Queen, Kristen Knipe, Dakota Howard, Yvette Unoarumhi, Darlene Wagner, Matthew Schmerer, Ben L. Rambo-Martin, Kristine Lacek, Sam Shepard, Alison Laufer Halpin, Dave Wentworth, Vivien Dugan, Suxiang Tong, Justin Lee                                                                    |
| hCoV-19/USA/AK-CDC-2-4043705/2021    | EPI_ISL_1446662 | 3/6/2021  | AK State Public Health Lab, State Health Department | Centers for Disease Control and Prevention<br>Division of Viral Diseases, Pathogen Discovery | Mili Sheth, Sarah Nobles, Jasmine Padilla, Mark Burroughs, Shoshona Le, Katie Dillon, Peter Cook, Clinton R. Paden, Dhvani Batra, Krista Queen, Kristen Knipe, Dakota Howard, Yvette Unoarumhi, Darlene Wagner, Matthew Schmerer, Ben L. Rambo-Martin, Kristine Lacek, Sam Shepard, Alison Laufer Halpin, Dave Wentworth, Vivien Dugan, Suxiang Tong, Justin Lee                                                                    |
| hCoV-19/USA/AK-CDC-2-4122930/2021    | EPI_ISL_1528492 | 3/17/2021 | AK State Public Health Lab, State Health Department | Centers for Disease Control and Prevention<br>Division of Viral Diseases, Pathogen Discovery | Mili Sheth, Sarah Nobles, Jasmine Padilla, Mark Burroughs, Shoshona Le, Katie Dillon, Peter Cook, Clinton R. Paden, Dhvani Batra, Krista Queen, Kristen Knipe, Dakota Howard, Yvette Unoarumhi, Darlene Wagner, Matthew Schmerer, Ben L. Rambo-Martin, Kristine Lacek, Sam Shepard, Alison Laufer Halpin, Dave Wentworth, Vivien Dugan, Suxiang Tong, Justin Lee                                                                    |
| hCoV-19/USA/AK-CDC-2-4122911/2021    | EPI_ISL_1528479 | 3/22/2021 | AK State Public Health Lab, State Health Department | Centers for Disease Control and Prevention<br>Division of Viral Diseases, Pathogen Discovery | Mili Sheth, Sarah Nobles, Jasmine Padilla, Mark Burroughs, Shoshona Le, Katie Dillon, Peter Cook, Clinton R. Paden, Dhvani Batra, Krista Queen, Kristen Knipe, Dakota Howard, Yvette Unoarumhi, Darlene Wagner, Matthew Schmerer, Ben L. Rambo-Martin, Kristine Lacek, Sam Shepard, Alison Laufer Halpin, Dave Wentworth, Vivien Dugan, Suxiang Tong, Justin Lee                                                                    |





|                                      |                 |            |                                                     |                                                                                              |                                                                                                                                                                                                                                                                                                                                                                                                                                     |
|--------------------------------------|-----------------|------------|-----------------------------------------------------|----------------------------------------------------------------------------------------------|-------------------------------------------------------------------------------------------------------------------------------------------------------------------------------------------------------------------------------------------------------------------------------------------------------------------------------------------------------------------------------------------------------------------------------------|
| hCoV-19/USA/AK-CDC-2-4123007/2021    | EPI_ISL_1528491 | 3/22/2021  | AK State Public Health Lab, State Health Department | Centers for Disease Control and Prevention<br>Division of Viral Diseases, Pathogen Discovery | Mili Sheth, Sarah Nobles, Jasmine Padilla, Mark Burroughs, Shoshona Le, Katie Dillon, Peter Cook, Clinton R. Paden, Dhvani Batra, Krista Queen, Kristen Kripe, Dakota Howard, Yvette Unoarumhi, Darlene Wagner, Matthew Schmeier, Ben L. Rambo-Martin, Kristine Lacek, Sam Shepard, Alison Laufer Halpin, Dave Wentworth, Vivien Dugan, Suxiang Tong, Justin Lee                                                                    |
| hCoV-19/USA/AK-CDC-ASC210003733/2021 | EPI_ISL_1550635 | 3/11/2021  | Aegis Sciences Corporation                          | Centers for Disease Control and Prevention<br>Division of Viral Diseases, Pathogen Discovery | Dakota Howard, Dhvani Batra, Peter W. Cook, Kara Moser, Adrian Paskey, Jason Caravas, Benjamin Rambo-Martin, Shatavia Morrison, Christopher Gulvick, Scott Sammons, Yvette Unoarumhi, Darlene Wagner, Matthew Schmeier, Cyndi Clark, Patrick Campbell, Rob Case, Vikramsinha Ghorpade, Holly Houdeshell, Ola Kvalvaag, Dillon Nall, Ethan Sanders, Alec Vest, Shaun Westlund, Matthew Hardison, Clinton R. Paden, Duncan MacCannell |
| hCoV-19/USA/AK-CDC-ASC210005628/2021 | EPI_ISL_1560222 | 3/13/2021  | Aegis Sciences Corporation                          | Centers for Disease Control and Prevention<br>Division of Viral Diseases, Pathogen Discovery | Dakota Howard, Dhvani Batra, Peter W. Cook, Kara Moser, Adrian Paskey, Jason Caravas, Benjamin Rambo-Martin, Shatavia Morrison, Christopher Gulvick, Scott Sammons, Yvette Unoarumhi, Darlene Wagner, Matthew Schmeier, Cyndi Clark, Patrick Campbell, Rob Case, Vikramsinha Ghorpade, Holly Houdeshell, Ola Kvalvaag, Dillon Nall, Ethan Sanders, Alec Vest, Shaun Westlund, Matthew Hardison, Clinton R. Paden, Duncan MacCannell |
| hCoV-19/USA/AK-PHL7768/2021          | EPI_ISL_1575082 | 3/25/2021  | Alaska State Virology Laboratory                    | Alaska State Virology Laboratory                                                             | Stephanie DeRonde, Elva House, Lisa Smith, Ph.D., Jack Chen, Ph.D.                                                                                                                                                                                                                                                                                                                                                                  |
| hCoV-19/USA/AK-PHL7772/2021          | EPI_ISL_1575084 | 3/27/2021  | Alaska State Virology Laboratory                    | Alaska State Virology Laboratory                                                             | Stephanie DeRonde, Elva House, Lisa Smith, Ph.D., Jack Chen, Ph.D.                                                                                                                                                                                                                                                                                                                                                                  |
| hCoV-19/USA/AK-PHL7773/2021          | EPI_ISL_1575085 | 3/26/2021  | Alaska State Virology Laboratory                    | Alaska State Virology Laboratory                                                             | Stephanie DeRonde, Elva House, Lisa Smith, Ph.D., Jack Chen, Ph.D.                                                                                                                                                                                                                                                                                                                                                                  |
| hCoV-19/USA/AK-PHL7776/2021          | EPI_ISL_1575087 | 3/26/2021  | Alaska State Virology Laboratory                    | Alaska State Virology Laboratory                                                             | Stephanie DeRonde, Elva House, Lisa Smith, Ph.D., Jack Chen, Ph.D.                                                                                                                                                                                                                                                                                                                                                                  |
| hCoV-19/USA/AK-PHL7778/2021          | EPI_ISL_1575088 | 3/26/2021  | Alaska State Virology Laboratory                    | Alaska State Virology Laboratory                                                             | Stephanie DeRonde, Elva House, Lisa Smith, Ph.D., Jack Chen, Ph.D.                                                                                                                                                                                                                                                                                                                                                                  |
| hCoV-19/USA/AK-PHL7779/2021          | EPI_ISL_1575089 | 3/26/2021  | Alaska State Virology Laboratory                    | Alaska State Virology Laboratory                                                             | Stephanie DeRonde, Elva House, Lisa Smith, Ph.D., Jack Chen, Ph.D.                                                                                                                                                                                                                                                                                                                                                                  |
| hCoV-19/USA/AK-PHL7780/2021          | EPI_ISL_1575090 | 3/26/2021  | Alaska State Virology Laboratory                    | Alaska State Virology Laboratory                                                             | Stephanie DeRonde, Elva House, Lisa Smith, Ph.D., Jack Chen, Ph.D.                                                                                                                                                                                                                                                                                                                                                                  |
| hCoV-19/USA/AK-PHL7785/2021          | EPI_ISL_1575093 | 3/26/2021  | Alaska State Virology Laboratory                    | Alaska State Virology Laboratory                                                             | Stephanie DeRonde, Elva House, Lisa Smith, Ph.D., Jack Chen, Ph.D.                                                                                                                                                                                                                                                                                                                                                                  |
| hCoV-19/USA/AK-PHL7787/2021          | EPI_ISL_1575095 | 3/25/2021  | Alaska State Virology Laboratory                    | Alaska State Virology Laboratory                                                             | Stephanie DeRonde, Elva House, Lisa Smith, Ph.D., Jack Chen, Ph.D.                                                                                                                                                                                                                                                                                                                                                                  |
| hCoV-19/USA/AK-PHL7793/2021          | EPI_ISL_1575098 | 3/26/2021  | Alaska State Virology Laboratory                    | Alaska State Virology Laboratory                                                             | Stephanie DeRonde, Elva House, Lisa Smith, Ph.D., Jack Chen, Ph.D.                                                                                                                                                                                                                                                                                                                                                                  |
| hCoV-19/USA/AK-PHL7807/2021          | EPI_ISL_1575106 | 3/25/2021  | Alaska State Virology Laboratory                    | Alaska State Virology Laboratory                                                             | Stephanie DeRonde, Elva House, Lisa Smith, Ph.D., Jack Chen, Ph.D.                                                                                                                                                                                                                                                                                                                                                                  |
| hCoV-19/USA/AK-PHL7808/2021          | EPI_ISL_1575107 | 3/25/2021  | Alaska State Virology Laboratory                    | Alaska State Virology Laboratory                                                             | Stephanie DeRonde, Elva House, Lisa Smith, Ph.D., Jack Chen, Ph.D.                                                                                                                                                                                                                                                                                                                                                                  |
| hCoV-19/USA/AK-PHL7809/2021          | EPI_ISL_1575108 | 3/30/2021  | Alaska State Virology Laboratory                    | Alaska State Virology Laboratory                                                             | Stephanie DeRonde, Elva House, Lisa Smith, Ph.D., Jack Chen, Ph.D.                                                                                                                                                                                                                                                                                                                                                                  |
| hCoV-19/USA/AK-PHL7810/2021          | EPI_ISL_1575109 | 3/30/2021  | Alaska State Virology Laboratory                    | Alaska State Virology Laboratory                                                             | Stephanie DeRonde, Elva House, Lisa Smith, Ph.D., Jack Chen, Ph.D.                                                                                                                                                                                                                                                                                                                                                                  |
| hCoV-19/USA/AK-PHL7811/2021          | EPI_ISL_1575110 | 3/30/2021  | Alaska State Virology Laboratory                    | Alaska State Virology Laboratory                                                             | Stephanie DeRonde, Elva House, Lisa Smith, Ph.D., Jack Chen, Ph.D.                                                                                                                                                                                                                                                                                                                                                                  |
| hCoV-19/USA/AK-PHL7812/2021          | EPI_ISL_1575111 | 3/30/2021  | Alaska State Virology Laboratory                    | Alaska State Virology Laboratory                                                             | Stephanie DeRonde, Elva House, Lisa Smith, Ph.D., Jack Chen, Ph.D.                                                                                                                                                                                                                                                                                                                                                                  |
| hCoV-19/USA/AK-CDC-FG-011939/2021    | EPI_ISL_1555564 | 3/7/2021   | Fulgent Genetics                                    | Centers for Disease Control and Prevention<br>Division of Viral Diseases, Pathogen Discovery | Dakota Howard, Dhvani Batra, Peter W. Cook, Kara Moser, Adrian Paskey, Jason Caravas, Benjamin Rambo-Martin, Shatavia Morrison, Christopher Gulvick, Scott Sammons, Yvette Unoarumhi, Darlene Wagner, Matthew Schmeier, Harry Gao, Mickey Li, John Gao, Joseph Fierro, Benafsh Sapra, Becky Tsai, Yan Meng, Doreen Ng, James Xie, Clinton R. Paden, Duncan MacCannell                                                               |
| hCoV-19/USA/AK-PHL6651/2020          | EPI_ISL_806829  | 11/29/2020 | Alaska State Virology Laboratory                    | Alaska State Virology Laboratory                                                             | Stephanie DeRonde, Lisa Smith, Ph.D., Devin M. Drown, Ph.D., Jack Chen, Ph.D.                                                                                                                                                                                                                                                                                                                                                       |
| hCoV-19/USA/AK-PHL6652/2020          | EPI_ISL_806830  | 11/30/2020 | Alaska State Virology Laboratory                    | Alaska State Virology Laboratory                                                             | Stephanie DeRonde, Lisa Smith, Ph.D., Devin M. Drown, Ph.D., Jack Chen, Ph.D.                                                                                                                                                                                                                                                                                                                                                       |
| hCoV-19/USA/AK-PHL6653/2020          | EPI_ISL_806831  | 11/30/2020 | Alaska State Virology Laboratory                    | Alaska State Virology Laboratory                                                             | Stephanie DeRonde, Lisa Smith, Ph.D., Devin M. Drown, Ph.D., Jack Chen, Ph.D.                                                                                                                                                                                                                                                                                                                                                       |
| hCoV-19/USA/AK-PHL6656/2020          | EPI_ISL_806834  | 12/1/2020  | Alaska State Virology Laboratory                    | Alaska State Virology Laboratory                                                             | Stephanie DeRonde, Lisa Smith, Ph.D., Devin M. Drown, Ph.D., Jack Chen, Ph.D.                                                                                                                                                                                                                                                                                                                                                       |
| hCoV-19/USA/AK-PHL6657/2020          | EPI_ISL_806835  | 12/1/2020  | Alaska State Virology Laboratory                    | Alaska State Virology Laboratory                                                             | Stephanie DeRonde, Lisa Smith, Ph.D., Devin M. Drown, Ph.D., Jack Chen, Ph.D.                                                                                                                                                                                                                                                                                                                                                       |
| hCoV-19/USA/AK-PHL6658/2020          | EPI_ISL_806836  | 12/2/2020  | Alaska State Virology Laboratory                    | Alaska State Virology Laboratory                                                             | Stephanie DeRonde, Lisa Smith, Ph.D., Devin M. Drown, Ph.D., Jack Chen, Ph.D.                                                                                                                                                                                                                                                                                                                                                       |
| hCoV-19/USA/AK-PHL6660/2020          | EPI_ISL_806838  | 12/3/2020  | Alaska State Virology Laboratory                    | Alaska State Virology Laboratory                                                             | Stephanie DeRonde, Lisa Smith, Ph.D., Devin M. Drown, Ph.D., Jack Chen, Ph.D.                                                                                                                                                                                                                                                                                                                                                       |
| hCoV-19/USA/AK-PHL6661/2020          | EPI_ISL_806839  | 12/3/2020  | Alaska State Virology Laboratory                    | Alaska State Virology Laboratory                                                             | Stephanie DeRonde, Lisa Smith, Ph.D., Devin M. Drown, Ph.D., Jack Chen, Ph.D.                                                                                                                                                                                                                                                                                                                                                       |
| hCoV-19/USA/AK-PHL6662/2020          | EPI_ISL_806840  | 11/30/2020 | Alaska State Virology Laboratory                    | Alaska State Virology Laboratory                                                             | Stephanie DeRonde, Lisa Smith, Ph.D., Devin M. Drown, Ph.D., Jack Chen, Ph.D.                                                                                                                                                                                                                                                                                                                                                       |
| hCoV-19/USA/AK-PHL6663/2020          | EPI_ISL_806841  | 12/6/2020  | Alaska State Virology Laboratory                    | Alaska State Virology Laboratory                                                             | Stephanie DeRonde, Lisa Smith, Ph.D., Devin M. Drown, Ph.D., Jack Chen, Ph.D.                                                                                                                                                                                                                                                                                                                                                       |
| hCoV-19/USA/AK-PHL6665/2020          | EPI_ISL_806843  | 12/8/2020  | Alaska State Virology Laboratory                    | Alaska State Virology Laboratory                                                             | Stephanie DeRonde, Lisa Smith, Ph.D., Devin M. Drown, Ph.D., Jack Chen, Ph.D.                                                                                                                                                                                                                                                                                                                                                       |
| hCoV-19/USA/AK-PHL6666/2020          | EPI_ISL_806844  | 12/8/2020  | Alaska State Virology Laboratory                    | Alaska State Virology Laboratory                                                             | Stephanie DeRonde, Lisa Smith, Ph.D., Devin M. Drown, Ph.D., Jack Chen, Ph.D.                                                                                                                                                                                                                                                                                                                                                       |
| hCoV-19/USA/AK-PHL6669/2020          | EPI_ISL_806847  | 12/2/2020  | Alaska State Virology Laboratory                    | Alaska State Virology Laboratory                                                             | Stephanie DeRonde, Lisa Smith, Ph.D., Devin M. Drown, Ph.D., Jack Chen, Ph.D.                                                                                                                                                                                                                                                                                                                                                       |
| hCoV-19/USA/AK-PHL6670/2020          | EPI_ISL_806848  | 12/12/2020 | Alaska State Virology Laboratory                    | Alaska State Virology Laboratory                                                             | Stephanie DeRonde, Lisa Smith, Ph.D., Devin M. Drown, Ph.D., Jack Chen, Ph.D.                                                                                                                                                                                                                                                                                                                                                       |





|                                      |                 |            |                                  |                                                                                              |                                                                                                                                                                                                                                                                                                                                                                                                                                     |
|--------------------------------------|-----------------|------------|----------------------------------|----------------------------------------------------------------------------------------------|-------------------------------------------------------------------------------------------------------------------------------------------------------------------------------------------------------------------------------------------------------------------------------------------------------------------------------------------------------------------------------------------------------------------------------------|
| hCoV-19/USA/AK-PHL6905/2021          | EPI_ISL_1061293 | 2/8/2021   | Alaska State Virology Laboratory | Alaska State Virology Laboratory                                                             | Stephanie DeRonde, Lisa Smith, Ph.D., Jack Chen, Ph.D.                                                                                                                                                                                                                                                                                                                                                                              |
| hCoV-19/USA/AK-PHL6907/2021          | EPI_ISL_1061294 | 2/8/2021   | Alaska State Virology Laboratory | Alaska State Virology Laboratory                                                             | Stephanie DeRonde, Lisa Smith, Ph.D., Jack Chen, Ph.D.                                                                                                                                                                                                                                                                                                                                                                              |
| hCoV-19/USA/AK-PHL6908/2021          | EPI_ISL_1061295 | 2/9/2021   | Alaska State Virology Laboratory | Alaska State Virology Laboratory                                                             | Stephanie DeRonde, Lisa Smith, Ph.D., Jack Chen, Ph.D.                                                                                                                                                                                                                                                                                                                                                                              |
| hCoV-19/USA/AK-PHL6909/2021          | EPI_ISL_1061296 | 2/9/2021   | Alaska State Virology Laboratory | Alaska State Virology Laboratory                                                             | Stephanie DeRonde, Lisa Smith, Ph.D., Jack Chen, Ph.D.                                                                                                                                                                                                                                                                                                                                                                              |
| hCoV-19/USA/AK-PHL6910/2021          | EPI_ISL_1061297 | 2/8/2021   | Alaska State Virology Laboratory | Alaska State Virology Laboratory                                                             | Stephanie DeRonde, Lisa Smith, Ph.D., Jack Chen, Ph.D.                                                                                                                                                                                                                                                                                                                                                                              |
| hCoV-19/USA/AK-PHL6911/2021          | EPI_ISL_1061298 | 2/8/2021   | Alaska State Virology Laboratory | Alaska State Virology Laboratory                                                             | Stephanie DeRonde, Lisa Smith, Ph.D., Jack Chen, Ph.D.                                                                                                                                                                                                                                                                                                                                                                              |
| hCoV-19/USA/AK-PHL6912/2021          | EPI_ISL_1061299 | 2/10/2021  | Alaska State Virology Laboratory | Alaska State Virology Laboratory                                                             | Stephanie DeRonde, Lisa Smith, Ph.D., Jack Chen, Ph.D.                                                                                                                                                                                                                                                                                                                                                                              |
| hCoV-19/USA/AK-PHL6913/2021          | EPI_ISL_1061300 | 2/8/2021   | Alaska State Virology Laboratory | Alaska State Virology Laboratory                                                             | Stephanie DeRonde, Lisa Smith, Ph.D., Jack Chen, Ph.D.                                                                                                                                                                                                                                                                                                                                                                              |
| hCoV-19/USA/AK-PHL6914/2021          | EPI_ISL_1061301 | 2/8/2021   | Alaska State Virology Laboratory | Alaska State Virology Laboratory                                                             | Stephanie DeRonde, Lisa Smith, Ph.D., Jack Chen, Ph.D.                                                                                                                                                                                                                                                                                                                                                                              |
| hCoV-19/USA/AK-PHL6915/2020          | EPI_ISL_1061302 | 12/16/2020 | Alaska State Virology Laboratory | Alaska State Virology Laboratory                                                             | Stephanie DeRonde, Lisa Smith, Ph.D., Jack Chen, Ph.D.                                                                                                                                                                                                                                                                                                                                                                              |
| hCoV-19/USA/AK-PHL6916/2020          | EPI_ISL_1061303 | 12/23/2020 | Alaska State Virology Laboratory | Alaska State Virology Laboratory                                                             | Stephanie DeRonde, Lisa Smith, Ph.D., Jack Chen, Ph.D.                                                                                                                                                                                                                                                                                                                                                                              |
| hCoV-19/USA/AK-PHL6917/2020          | EPI_ISL_1061304 | 12/23/2020 | Alaska State Virology Laboratory | Alaska State Virology Laboratory                                                             | Stephanie DeRonde, Lisa Smith, Ph.D., Jack Chen, Ph.D.                                                                                                                                                                                                                                                                                                                                                                              |
| hCoV-19/USA/AK-PHL6922/2021          | EPI_ISL_1061305 | 2/3/2021   | Alaska State Virology Laboratory | Alaska State Virology Laboratory                                                             | Stephanie DeRonde, Lisa Smith, Ph.D., Jack Chen, Ph.D.                                                                                                                                                                                                                                                                                                                                                                              |
| hCoV-19/USA/AK-PHL6925/2021          | EPI_ISL_1061306 | 2/4/2021   | Alaska State Virology Laboratory | Alaska State Virology Laboratory                                                             | Stephanie DeRonde, Lisa Smith, Ph.D., Jack Chen, Ph.D.                                                                                                                                                                                                                                                                                                                                                                              |
| hCoV-19/USA/AK-PHL6926/2021          | EPI_ISL_1061307 | 2/8/2021   | Alaska State Virology Laboratory | Alaska State Virology Laboratory                                                             | Stephanie DeRonde, Lisa Smith, Ph.D., Jack Chen, Ph.D.                                                                                                                                                                                                                                                                                                                                                                              |
| hCoV-19/USA/AK-PHL6928/2021          | EPI_ISL_1061308 | 1/28/2021  | Alaska State Virology Laboratory | Alaska State Virology Laboratory                                                             | Stephanie DeRonde, Lisa Smith, Ph.D., Jack Chen, Ph.D.                                                                                                                                                                                                                                                                                                                                                                              |
| hCoV-19/USA/AK-PHL6847/2021          | EPI_ISL_1068293 | 1/30/2021  | Alaska State Virology Laboratory | Alaska State Virology Laboratory                                                             | Stephanie DeRonde, Lisa Smith, Ph.D., Jack Chen, Ph.D.                                                                                                                                                                                                                                                                                                                                                                              |
| hCoV-19/USA/AK-PHL6848/2021          | EPI_ISL_1068294 | 1/30/2021  | Alaska State Virology Laboratory | Alaska State Virology Laboratory                                                             | Stephanie DeRonde, Lisa Smith, Ph.D., Jack Chen, Ph.D.                                                                                                                                                                                                                                                                                                                                                                              |
| hCoV-19/USA/AK-PHL6849/2021          | EPI_ISL_1068295 | 1/31/2021  | Alaska State Virology Laboratory | Alaska State Virology Laboratory                                                             | Stephanie DeRonde, Lisa Smith, Ph.D., Jack Chen, Ph.D.                                                                                                                                                                                                                                                                                                                                                                              |
| hCoV-19/USA/AK-PHL6850/2021          | EPI_ISL_1068296 | 2/1/2021   | Alaska State Virology Laboratory | Alaska State Virology Laboratory                                                             | Stephanie DeRonde, Lisa Smith, Ph.D., Jack Chen, Ph.D.                                                                                                                                                                                                                                                                                                                                                                              |
| hCoV-19/USA/AK-PHL6851/2021          | EPI_ISL_1068297 | 1/29/2021  | Alaska State Virology Laboratory | Alaska State Virology Laboratory                                                             | Stephanie DeRonde, Lisa Smith, Ph.D., Jack Chen, Ph.D.                                                                                                                                                                                                                                                                                                                                                                              |
| hCoV-19/USA/AK-PHL6852/2021          | EPI_ISL_1068298 | 2/2/2021   | Alaska State Virology Laboratory | Alaska State Virology Laboratory                                                             | Stephanie DeRonde, Lisa Smith, Ph.D., Jack Chen, Ph.D.                                                                                                                                                                                                                                                                                                                                                                              |
| hCoV-19/USA/AK-PHL6855/2021          | EPI_ISL_1068299 | 2/4/2021   | Alaska State Virology Laboratory | Alaska State Virology Laboratory                                                             | Stephanie DeRonde, Lisa Smith, Ph.D., Jack Chen, Ph.D.                                                                                                                                                                                                                                                                                                                                                                              |
| hCoV-19/USA/AK-PHL6856/2021          | EPI_ISL_1068300 | 2/4/2021   | Alaska State Virology Laboratory | Alaska State Virology Laboratory                                                             | Stephanie DeRonde, Lisa Smith, Ph.D., Jack Chen, Ph.D.                                                                                                                                                                                                                                                                                                                                                                              |
| hCoV-19/USA/AK-PHL6857/2021          | EPI_ISL_1068301 | 2/5/2021   | Alaska State Virology Laboratory | Alaska State Virology Laboratory                                                             | Stephanie DeRonde, Lisa Smith, Ph.D., Jack Chen, Ph.D.                                                                                                                                                                                                                                                                                                                                                                              |
| hCoV-19/USA/AK-PHL6870/2021          | EPI_ISL_1068302 | 1/11/2021  | Alaska State Virology Laboratory | Alaska State Virology Laboratory                                                             | Stephanie DeRonde, Lisa Smith, Ph.D., Jack Chen, Ph.D.                                                                                                                                                                                                                                                                                                                                                                              |
| hCoV-19/USA/AK-PHL6871/2021          | EPI_ISL_1068303 | 1/15/2021  | Alaska State Virology Laboratory | Alaska State Virology Laboratory                                                             | Stephanie DeRonde, Lisa Smith, Ph.D., Jack Chen, Ph.D.                                                                                                                                                                                                                                                                                                                                                                              |
| hCoV-19/USA/AK-PHL6872/2021          | EPI_ISL_1068304 | 1/12/2021  | Alaska State Virology Laboratory | Alaska State Virology Laboratory                                                             | Stephanie DeRonde, Lisa Smith, Ph.D., Jack Chen, Ph.D.                                                                                                                                                                                                                                                                                                                                                                              |
| hCoV-19/USA/AK-PHL6876/2021          | EPI_ISL_1068305 | 2/5/2021   | Alaska State Virology Laboratory | Alaska State Virology Laboratory                                                             | Stephanie DeRonde, Lisa Smith, Ph.D., Jack Chen, Ph.D.                                                                                                                                                                                                                                                                                                                                                                              |
| hCoV-19/USA/AK-PHL6877/2021          | EPI_ISL_1068306 | 1/28/2021  | Alaska State Virology Laboratory | Alaska State Virology Laboratory                                                             | Stephanie DeRonde, Lisa Smith, Ph.D., Jack Chen, Ph.D.                                                                                                                                                                                                                                                                                                                                                                              |
| hCoV-19/USA/AK-PHL6878/2021          | EPI_ISL_1068307 | 1/28/2021  | Alaska State Virology Laboratory | Alaska State Virology Laboratory                                                             | Stephanie DeRonde, Lisa Smith, Ph.D., Jack Chen, Ph.D.                                                                                                                                                                                                                                                                                                                                                                              |
| hCoV-19/USA/AK-PHL6879/2021          | EPI_ISL_1068308 | 1/27/2021  | Alaska State Virology Laboratory | Alaska State Virology Laboratory                                                             | Stephanie DeRonde, Lisa Smith, Ph.D., Jack Chen, Ph.D.                                                                                                                                                                                                                                                                                                                                                                              |
| hCoV-19/USA/AK-PHL6880/2021          | EPI_ISL_1068309 | 1/28/2021  | Alaska State Virology Laboratory | Alaska State Virology Laboratory                                                             | Stephanie DeRonde, Lisa Smith, Ph.D., Jack Chen, Ph.D.                                                                                                                                                                                                                                                                                                                                                                              |
| hCoV-19/USA/AK-PHL6881/2021          | EPI_ISL_1068310 | 1/28/2021  | Alaska State Virology Laboratory | Alaska State Virology Laboratory                                                             | Stephanie DeRonde, Lisa Smith, Ph.D., Jack Chen, Ph.D.                                                                                                                                                                                                                                                                                                                                                                              |
| hCoV-19/USA/AK-PHL6882/2021          | EPI_ISL_1068311 | 2/6/2021   | Alaska State Virology Laboratory | Alaska State Virology Laboratory                                                             | Stephanie DeRonde, Lisa Smith, Ph.D., Jack Chen, Ph.D.                                                                                                                                                                                                                                                                                                                                                                              |
| hCoV-19/USA/AK-PHL6883/2021          | EPI_ISL_1068312 | 2/6/2021   | Alaska State Virology Laboratory | Alaska State Virology Laboratory                                                             | Stephanie DeRonde, Lisa Smith, Ph.D., Jack Chen, Ph.D.                                                                                                                                                                                                                                                                                                                                                                              |
| hCoV-19/USA/AK-PHL6884/2021          | EPI_ISL_1068313 | 2/6/2021   | Alaska State Virology Laboratory | Alaska State Virology Laboratory                                                             | Stephanie DeRonde, Lisa Smith, Ph.D., Jack Chen, Ph.D.                                                                                                                                                                                                                                                                                                                                                                              |
| hCoV-19/USA/AK-PHL6885/2021          | EPI_ISL_1068314 | 2/7/2021   | Alaska State Virology Laboratory | Alaska State Virology Laboratory                                                             | Stephanie DeRonde, Lisa Smith, Ph.D., Jack Chen, Ph.D.                                                                                                                                                                                                                                                                                                                                                                              |
| hCoV-19/USA/AK-CDC-ASC210042064/2021 | EPI_ISL_1737216 | 4/1/2021   | Aegis Sciences Corporation       | Centers for Disease Control and Prevention<br>Division of Viral Diseases, Pathogen Discovery | Dakota Howard, Dhvani Batra, Peter W. Cook, Kara Moser, Adrian Paskey, Jason Caravas, Benjamin Rambo-Martin, Shatavia Morrison, Christopher Gulvick, Scott Sammons, Yvette Unoarumhi, Darlene Wagner, Matthew Schmerer, Cyndi Clark, Patrick Campbell, Rob Case, Vikramsinha Ghorpade, Holly Houdeshell, Ola Kvalvaag, Dillon Nall, Ethan Sanders, Alec Vest, Shaun Westlund, Matthew Hardison, Clinton R. Paden, Duncan MacCannell |
| hCoV-19/USA/AK-PHL7231/2021          | EPI_ISL_1182693 | 2/16/2021  | Alaska State Virology Laboratory | Alaska State Virology Laboratory                                                             | Stephanie DeRonde, Lisa Smith, Ph.D., Jack Chen, Ph.D.                                                                                                                                                                                                                                                                                                                                                                              |
| hCoV-19/USA/AK-PHL7267/2021          | EPI_ISL_1182694 | 2/19/2021  | Alaska State Virology Laboratory | Alaska State Virology Laboratory                                                             | Stephanie DeRonde, Lisa Smith, Ph.D., Jack Chen, Ph.D.                                                                                                                                                                                                                                                                                                                                                                              |
| hCoV-19/USA/AK-PHL7253/2021          | EPI_ISL_1182695 | 2/17/2021  | Alaska State Virology Laboratory | Alaska State Virology Laboratory                                                             | Stephanie DeRonde, Lisa Smith, Ph.D., Jack Chen, Ph.D.                                                                                                                                                                                                                                                                                                                                                                              |
| hCoV-19/USA/AK-PHL7239/2021          | EPI_ISL_1182696 | 2/16/2021  | Alaska State Virology Laboratory | Alaska State Virology Laboratory                                                             | Stephanie DeRonde, Lisa Smith, Ph.D., Jack Chen, Ph.D.                                                                                                                                                                                                                                                                                                                                                                              |
| hCoV-19/USA/AK-PHL7246/2021          | EPI_ISL_1182697 | 2/17/2021  | Alaska State Virology Laboratory | Alaska State Virology Laboratory                                                             | Stephanie DeRonde, Lisa Smith, Ph.D., Jack Chen, Ph.D.                                                                                                                                                                                                                                                                                                                                                                              |
| hCoV-19/USA/AK-PHL7247/2021          | EPI_ISL_1182698 | 2/17/2021  | Alaska State Virology Laboratory | Alaska State Virology Laboratory                                                             | Stephanie DeRonde, Lisa Smith, Ph.D., Jack Chen, Ph.D.                                                                                                                                                                                                                                                                                                                                                                              |
| hCoV-19/USA/AK-PHL7234/2021          | EPI_ISL_1182699 | 2/16/2021  | Alaska State Virology Laboratory | Alaska State Virology Laboratory                                                             | Stephanie DeRonde, Lisa Smith, Ph.D., Jack Chen, Ph.D.                                                                                                                                                                                                                                                                                                                                                                              |



















|                                   |                 |           |                                   |                                                                                              |                                                                                                                                                                                                                                                                                                                                                                                                                                                                                                                                                                                                                                                                                                                                                                                                                                                                                                                                                                                                                                                                                     |
|-----------------------------------|-----------------|-----------|-----------------------------------|----------------------------------------------------------------------------------------------|-------------------------------------------------------------------------------------------------------------------------------------------------------------------------------------------------------------------------------------------------------------------------------------------------------------------------------------------------------------------------------------------------------------------------------------------------------------------------------------------------------------------------------------------------------------------------------------------------------------------------------------------------------------------------------------------------------------------------------------------------------------------------------------------------------------------------------------------------------------------------------------------------------------------------------------------------------------------------------------------------------------------------------------------------------------------------------------|
| hCoV-19/USA/AK-PHL9626/2021       | EPI_ISL_2626722 | 6/7/2021  | Alaska State Virology Laboratory  | Alaska State Virology Laboratory                                                             | Stephanie DeRonde, Elva House, Jacob Zidek, Lisa Smith, Ph.D., Jack Chen, Ph.D.                                                                                                                                                                                                                                                                                                                                                                                                                                                                                                                                                                                                                                                                                                                                                                                                                                                                                                                                                                                                     |
| hCoV-19/USA/AK-PHL9627/2021       | EPI_ISL_2626723 | 6/8/2021  | Alaska State Virology Laboratory  | Alaska State Virology Laboratory                                                             | Stephanie DeRonde, Elva House, Jacob Zidek, Lisa Smith, Ph.D., Jack Chen, Ph.D.                                                                                                                                                                                                                                                                                                                                                                                                                                                                                                                                                                                                                                                                                                                                                                                                                                                                                                                                                                                                     |
| hCoV-19/USA/AK-PHL9628/2021       | EPI_ISL_2626724 | 6/8/2021  | Alaska State Virology Laboratory  | Alaska State Virology Laboratory                                                             | Stephanie DeRonde, Elva House, Jacob Zidek, Lisa Smith, Ph.D., Jack Chen, Ph.D.                                                                                                                                                                                                                                                                                                                                                                                                                                                                                                                                                                                                                                                                                                                                                                                                                                                                                                                                                                                                     |
| hCoV-19/USA/AK-PHL9630/2021       | EPI_ISL_2626726 | 6/8/2021  | Alaska State Virology Laboratory  | Alaska State Virology Laboratory                                                             | Stephanie DeRonde, Elva House, Jacob Zidek, Lisa Smith, Ph.D., Jack Chen, Ph.D.                                                                                                                                                                                                                                                                                                                                                                                                                                                                                                                                                                                                                                                                                                                                                                                                                                                                                                                                                                                                     |
| hCoV-19/USA/AK-PHL9631/2021       | EPI_ISL_2626727 | 6/8/2021  | Alaska State Virology Laboratory  | Alaska State Virology Laboratory                                                             | Stephanie DeRonde, Elva House, Jacob Zidek, Lisa Smith, Ph.D., Jack Chen, Ph.D.                                                                                                                                                                                                                                                                                                                                                                                                                                                                                                                                                                                                                                                                                                                                                                                                                                                                                                                                                                                                     |
| hCoV-19/USA/AK-PHL9632/2021       | EPI_ISL_2626728 | 6/8/2021  | Alaska State Virology Laboratory  | Alaska State Virology Laboratory                                                             | Stephanie DeRonde, Elva House, Jacob Zidek, Lisa Smith, Ph.D., Jack Chen, Ph.D.                                                                                                                                                                                                                                                                                                                                                                                                                                                                                                                                                                                                                                                                                                                                                                                                                                                                                                                                                                                                     |
| hCoV-19/USA/AK-PHL9633/2021       | EPI_ISL_2626729 | 6/7/2021  | Alaska State Virology Laboratory  | Alaska State Virology Laboratory                                                             | Stephanie DeRonde, Elva House, Jacob Zidek, Lisa Smith, Ph.D., Jack Chen, Ph.D.                                                                                                                                                                                                                                                                                                                                                                                                                                                                                                                                                                                                                                                                                                                                                                                                                                                                                                                                                                                                     |
| hCoV-19/USA/AK-PHL9634/2021       | EPI_ISL_2626730 | 5/31/2021 | Alaska State Virology Laboratory  | Alaska State Virology Laboratory                                                             | Stephanie DeRonde, Elva House, Jacob Zidek, Lisa Smith, Ph.D., Jack Chen, Ph.D.                                                                                                                                                                                                                                                                                                                                                                                                                                                                                                                                                                                                                                                                                                                                                                                                                                                                                                                                                                                                     |
| hCoV-19/USA/AK-PHL9635/2021       | EPI_ISL_2626731 | 6/12/2021 | Alaska State Virology Laboratory  | Alaska State Virology Laboratory                                                             | Stephanie DeRonde, Elva House, Jacob Zidek, Lisa Smith, Ph.D., Jack Chen, Ph.D.                                                                                                                                                                                                                                                                                                                                                                                                                                                                                                                                                                                                                                                                                                                                                                                                                                                                                                                                                                                                     |
| hCoV-19/USA/AK-PHL9636/2021       | EPI_ISL_2626732 | 6/12/2021 | Alaska State Virology Laboratory  | Alaska State Virology Laboratory                                                             | Stephanie DeRonde, Elva House, Jacob Zidek, Lisa Smith, Ph.D., Jack Chen, Ph.D.                                                                                                                                                                                                                                                                                                                                                                                                                                                                                                                                                                                                                                                                                                                                                                                                                                                                                                                                                                                                     |
| hCoV-19/USA/AK-PHL9637/2021       | EPI_ISL_2626733 | 6/12/2021 | Alaska State Virology Laboratory  | Alaska State Virology Laboratory                                                             | Stephanie DeRonde, Elva House, Jacob Zidek, Lisa Smith, Ph.D., Jack Chen, Ph.D.                                                                                                                                                                                                                                                                                                                                                                                                                                                                                                                                                                                                                                                                                                                                                                                                                                                                                                                                                                                                     |
| hCoV-19/USA/AK-PHL9638/2021       | EPI_ISL_2626734 | 6/9/2021  | Alaska State Virology Laboratory  | Alaska State Virology Laboratory                                                             | Stephanie DeRonde, Elva House, Jacob Zidek, Lisa Smith, Ph.D., Jack Chen, Ph.D.                                                                                                                                                                                                                                                                                                                                                                                                                                                                                                                                                                                                                                                                                                                                                                                                                                                                                                                                                                                                     |
| hCoV-19/USA/AK-PHL9639/2021       | EPI_ISL_2626735 | 6/12/2021 | Alaska State Virology Laboratory  | Alaska State Virology Laboratory                                                             | Stephanie DeRonde, Elva House, Jacob Zidek, Lisa Smith, Ph.D., Jack Chen, Ph.D.                                                                                                                                                                                                                                                                                                                                                                                                                                                                                                                                                                                                                                                                                                                                                                                                                                                                                                                                                                                                     |
| hCoV-19/USA/AK-PHL9640/2021       | EPI_ISL_2626736 | 6/11/2021 | Alaska State Virology Laboratory  | Alaska State Virology Laboratory                                                             | Stephanie DeRonde, Elva House, Jacob Zidek, Lisa Smith, Ph.D., Jack Chen, Ph.D.                                                                                                                                                                                                                                                                                                                                                                                                                                                                                                                                                                                                                                                                                                                                                                                                                                                                                                                                                                                                     |
| hCoV-19/USA/AK-PHL9641/2021       | EPI_ISL_2626737 | 6/12/2021 | Alaska State Virology Laboratory  | Alaska State Virology Laboratory                                                             | Stephanie DeRonde, Elva House, Jacob Zidek, Lisa Smith, Ph.D., Jack Chen, Ph.D.                                                                                                                                                                                                                                                                                                                                                                                                                                                                                                                                                                                                                                                                                                                                                                                                                                                                                                                                                                                                     |
| hCoV-19/USA/AK-PHL9645/2021       | EPI_ISL_2626741 | 6/11/2021 | Alaska State Virology Laboratory  | Alaska State Virology Laboratory                                                             | Stephanie DeRonde, Elva House, Jacob Zidek, Lisa Smith, Ph.D., Jack Chen, Ph.D.                                                                                                                                                                                                                                                                                                                                                                                                                                                                                                                                                                                                                                                                                                                                                                                                                                                                                                                                                                                                     |
| hCoV-19/USA/AK-PHL9646/2021       | EPI_ISL_2626742 | 6/11/2021 | Alaska State Virology Laboratory  | Alaska State Virology Laboratory                                                             | Stephanie DeRonde, Elva House, Jacob Zidek, Lisa Smith, Ph.D., Jack Chen, Ph.D.                                                                                                                                                                                                                                                                                                                                                                                                                                                                                                                                                                                                                                                                                                                                                                                                                                                                                                                                                                                                     |
| hCoV-19/USA/AK-PHL9647/2021       | EPI_ISL_2626743 | 6/11/2021 | Alaska State Virology Laboratory  | Alaska State Virology Laboratory                                                             | Stephanie DeRonde, Elva House, Jacob Zidek, Lisa Smith, Ph.D., Jack Chen, Ph.D.                                                                                                                                                                                                                                                                                                                                                                                                                                                                                                                                                                                                                                                                                                                                                                                                                                                                                                                                                                                                     |
| hCoV-19/USA/AK-PHL9648/2021       | EPI_ISL_2626744 | 6/10/2021 | Alaska State Virology Laboratory  | Alaska State Virology Laboratory                                                             | Stephanie DeRonde, Elva House, Jacob Zidek, Lisa Smith, Ph.D., Jack Chen, Ph.D.                                                                                                                                                                                                                                                                                                                                                                                                                                                                                                                                                                                                                                                                                                                                                                                                                                                                                                                                                                                                     |
| hCoV-19/USA/AK-PHL9649/2021       | EPI_ISL_2626745 | 6/9/2021  | Alaska State Virology Laboratory  | Alaska State Virology Laboratory                                                             | Stephanie DeRonde, Elva House, Jacob Zidek, Lisa Smith, Ph.D., Jack Chen, Ph.D.                                                                                                                                                                                                                                                                                                                                                                                                                                                                                                                                                                                                                                                                                                                                                                                                                                                                                                                                                                                                     |
| hCoV-19/USA/AK-PHL9650/2021       | EPI_ISL_2626746 | 6/10/2021 | Alaska State Virology Laboratory  | Alaska State Virology Laboratory                                                             | Stephanie DeRonde, Elva House, Jacob Zidek, Lisa Smith, Ph.D., Jack Chen, Ph.D.                                                                                                                                                                                                                                                                                                                                                                                                                                                                                                                                                                                                                                                                                                                                                                                                                                                                                                                                                                                                     |
| hCoV-19/USA/AK-PHL9651/2021       | EPI_ISL_2626747 | 6/10/2021 | Alaska State Virology Laboratory  | Alaska State Virology Laboratory                                                             | Stephanie DeRonde, Elva House, Jacob Zidek, Lisa Smith, Ph.D., Jack Chen, Ph.D.                                                                                                                                                                                                                                                                                                                                                                                                                                                                                                                                                                                                                                                                                                                                                                                                                                                                                                                                                                                                     |
| hCoV-19/USA/AK-PHL9652/2021       | EPI_ISL_2626748 | 6/7/2021  | Alaska State Virology Laboratory  | Alaska State Virology Laboratory                                                             | Stephanie DeRonde, Elva House, Jacob Zidek, Lisa Smith, Ph.D., Jack Chen, Ph.D.                                                                                                                                                                                                                                                                                                                                                                                                                                                                                                                                                                                                                                                                                                                                                                                                                                                                                                                                                                                                     |
| hCoV-19/USA/AK-PHL9655/2021       | EPI_ISL_2626750 | 6/13/2021 | Alaska State Virology Laboratory  | Alaska State Virology Laboratory                                                             | Stephanie DeRonde, Elva House, Jacob Zidek, Lisa Smith, Ph.D., Jack Chen, Ph.D.                                                                                                                                                                                                                                                                                                                                                                                                                                                                                                                                                                                                                                                                                                                                                                                                                                                                                                                                                                                                     |
| hCoV-19/USA/AK-PHL9656/2021       | EPI_ISL_2626751 | 6/13/2021 | Alaska State Virology Laboratory  | Alaska State Virology Laboratory                                                             | Stephanie DeRonde, Elva House, Jacob Zidek, Lisa Smith, Ph.D., Jack Chen, Ph.D.                                                                                                                                                                                                                                                                                                                                                                                                                                                                                                                                                                                                                                                                                                                                                                                                                                                                                                                                                                                                     |
| hCoV-19/USA/AK-PHL9657/2021       | EPI_ISL_2626752 | 6/13/2021 | Alaska State Virology Laboratory  | Alaska State Virology Laboratory                                                             | Stephanie DeRonde, Elva House, Jacob Zidek, Lisa Smith, Ph.D., Jack Chen, Ph.D.                                                                                                                                                                                                                                                                                                                                                                                                                                                                                                                                                                                                                                                                                                                                                                                                                                                                                                                                                                                                     |
| hCoV-19/USA/AK-PHL9660/2021       | EPI_ISL_2626754 | 6/13/2021 | Alaska State Virology Laboratory  | Alaska State Virology Laboratory                                                             | Stephanie DeRonde, Elva House, Jacob Zidek, Lisa Smith, Ph.D., Jack Chen, Ph.D.                                                                                                                                                                                                                                                                                                                                                                                                                                                                                                                                                                                                                                                                                                                                                                                                                                                                                                                                                                                                     |
| hCoV-19/USA/AK-PHL9398/2021       | EPI_ISL_2628193 | 6/1/2021  | Alaska State Virology Laboratory  | Alaska State Virology Laboratory                                                             | Stephanie DeRonde, Elva House, Jacob Zidek, Lisa Smith, Ph.D., Jack Chen, Ph.D.                                                                                                                                                                                                                                                                                                                                                                                                                                                                                                                                                                                                                                                                                                                                                                                                                                                                                                                                                                                                     |
| hCoV-19/USA/AK-PHL8835/2021       | EPI_ISL_2473680 | 5/12/2021 | Alaska State Virology Laboratory  | Alaska State Virology Laboratory                                                             | Stephanie DeRonde, Elva House, Jacob Zidek, Lisa Smith, Ph.D., Jack Chen, Ph.D.                                                                                                                                                                                                                                                                                                                                                                                                                                                                                                                                                                                                                                                                                                                                                                                                                                                                                                                                                                                                     |
| hCoV-19/USA/AK-PHL8860/2021       | EPI_ISL_2473681 | 5/15/2021 | Alaska State Virology Laboratory  | Alaska State Virology Laboratory                                                             | Stephanie DeRonde, Elva House, Jacob Zidek, Lisa Smith, Ph.D., Jack Chen, Ph.D.                                                                                                                                                                                                                                                                                                                                                                                                                                                                                                                                                                                                                                                                                                                                                                                                                                                                                                                                                                                                     |
| hCoV-19/USA/AK-PHL8993/2021       | EPI_ISL_2473682 | 5/14/2021 | Alaska State Virology Laboratory  | Alaska State Virology Laboratory                                                             | Stephanie DeRonde, Elva House, Jacob Zidek, Lisa Smith, Ph.D., Jack Chen, Ph.D.                                                                                                                                                                                                                                                                                                                                                                                                                                                                                                                                                                                                                                                                                                                                                                                                                                                                                                                                                                                                     |
| hCoV-19/USA/AK-PHL9056/2021       | EPI_ISL_2473683 | 5/19/2021 | Alaska State Virology Laboratory  | Alaska State Virology Laboratory                                                             | Stephanie DeRonde, Elva House, Jacob Zidek, Lisa Smith, Ph.D., Jack Chen, Ph.D.                                                                                                                                                                                                                                                                                                                                                                                                                                                                                                                                                                                                                                                                                                                                                                                                                                                                                                                                                                                                     |
| hCoV-19/USA/AK-PHL9061/2021       | EPI_ISL_2473684 | 5/19/2021 | Alaska State Virology Laboratory  | Alaska State Virology Laboratory                                                             | Stephanie DeRonde, Elva House, Jacob Zidek, Lisa Smith, Ph.D., Jack Chen, Ph.D.                                                                                                                                                                                                                                                                                                                                                                                                                                                                                                                                                                                                                                                                                                                                                                                                                                                                                                                                                                                                     |
| hCoV-19/USA/AK-PHL9066/2021       | EPI_ISL_2473685 | 5/20/2021 | Alaska State Virology Laboratory  | Alaska State Virology Laboratory                                                             | Stephanie DeRonde, Elva House, Jacob Zidek, Lisa Smith, Ph.D., Jack Chen, Ph.D.                                                                                                                                                                                                                                                                                                                                                                                                                                                                                                                                                                                                                                                                                                                                                                                                                                                                                                                                                                                                     |
| hCoV-19/USA/AK-PHL9068/2021       | EPI_ISL_2473686 | 5/20/2021 | Alaska State Virology Laboratory  | Alaska State Virology Laboratory                                                             | Stephanie DeRonde, Elva House, Jacob Zidek, Lisa Smith, Ph.D., Jack Chen, Ph.D.                                                                                                                                                                                                                                                                                                                                                                                                                                                                                                                                                                                                                                                                                                                                                                                                                                                                                                                                                                                                     |
| hCoV-19/USA/AK-PHL9072/2021       | EPI_ISL_2473687 | 5/20/2021 | Alaska State Virology Laboratory  | Alaska State Virology Laboratory                                                             | Stephanie DeRonde, Elva House, Jacob Zidek, Lisa Smith, Ph.D., Jack Chen, Ph.D.                                                                                                                                                                                                                                                                                                                                                                                                                                                                                                                                                                                                                                                                                                                                                                                                                                                                                                                                                                                                     |
| hCoV-19/USA/AK-PHL9080/2021       | EPI_ISL_2473688 | 5/21/2021 | Alaska State Virology Laboratory  | Alaska State Virology Laboratory                                                             | Stephanie DeRonde, Elva House, Jacob Zidek, Lisa Smith, Ph.D., Jack Chen, Ph.D.                                                                                                                                                                                                                                                                                                                                                                                                                                                                                                                                                                                                                                                                                                                                                                                                                                                                                                                                                                                                     |
| hCoV-19/USA/AK-PHL9011/2021       | EPI_ISL_2473689 | 5/18/2021 | Alaska State Virology Laboratory  | Alaska State Virology Laboratory                                                             | Stephanie DeRonde, Elva House, Jacob Zidek, Lisa Smith, Ph.D., Jack Chen, Ph.D.                                                                                                                                                                                                                                                                                                                                                                                                                                                                                                                                                                                                                                                                                                                                                                                                                                                                                                                                                                                                     |
| hCoV-19/USA/AK-CDC-LC0066441/2021 | EPI_ISL_2480855 | 5/24/2021 | Laboratory Corporation of America | Centers for Disease Control and Prevention<br>Division of Viral Diseases, Pathogen Discovery | Dakota Howard, Dhvani Batra, Peter W. Cook, Kara Moser, Adrian Paskey, Jason Caravas, Benjamin Rambo-Martin, Shatavia Morrison, Christopher Gulvick, Scott Sammons, Yvette Unoarumhi, Darlene Wagner, Matthew Schmerer, Minoos Agarwal, Eyad Almasri, Debbie Boles, Ayla Burns, Nuthawin Charoensri, Oren Cohen, Susan Countryman, Mary Ann Cristobal, Bobbi Croy, Suzanne Dale, Hrushikesh Deshmukh, Amanda Douglas, Vincent Drouillon, Marcia Eisenberg, Howard Engler, Rama Ghatti, Prashant Gupta, Susan Hicks, Jake Humphrey, Lax Iyer, Lisa Pfefferle, Manoj Jain, Matthew Robinson, Mohan Kolli, Brian Krueger, Tim Kuphal, Stanley Letovsky, Michael Levandoski, Craig Lukasik, Jonathan Meltzer, Brian Norvell, Mindy Nye, Scott Parker, Christos Petropoulos, John Pruitt, Steven Ragan, Scott Ryan, Mike Sapeta, Jana Schroth, Suresh Babu Selvaraju, Goran Stevovic, Amanda Suchanek, Andrea Throop, Lyndon Tilson, Thomas Urban, Joe Voshell, Kimberly Wagner, Jonathan Williams, Mary Williamson, Qian Zeng, Tricia Zwiefelhofer, Clinton R. Paden, Duncan MacCannell |







|                                      |                 |            |                                                     |                                                                                              |                                                                                                                                                                                                                                                                                                                                                                                                                                     |
|--------------------------------------|-----------------|------------|-----------------------------------------------------|----------------------------------------------------------------------------------------------|-------------------------------------------------------------------------------------------------------------------------------------------------------------------------------------------------------------------------------------------------------------------------------------------------------------------------------------------------------------------------------------------------------------------------------------|
| hCoV-19/USA/AK-PHL8349/2021          | EPI_ISL_1896041 | 4/22/2021  | Alaska State Virology Laboratory                    | Alaska State Virology Laboratory                                                             | Stephanie DeRonde, Elva House, Jacob Zidek, Lisa Smith, Ph.D., Jack Chen, Ph.D.                                                                                                                                                                                                                                                                                                                                                     |
| hCoV-19/USA/AK-PHL6544/2020          | EPI_ISL_2557913 | 11/30/2020 | Alaska State Virology Laboratory                    | Alaska State Virology Laboratory                                                             | Stephanie DeRonde, Elva House, Jacob Zidek, Lisa Smith, Ph.D., Jack Chen, Ph.D.                                                                                                                                                                                                                                                                                                                                                     |
| hCoV-19/USA/AK-CDC-2-4504187/2021    | EPI_ISL_2689868 | 5/18/2021  | AK State Public Health Lab, State Health Department | Centers for Disease Control and Prevention<br>Division of Viral Diseases, Pathogen Discovery | Mili Sheth, Sarah Nobles, Jasmine Padilla, Mark Burroughs, Shoshona Le, Katie Dillon, Peter Cook, Clinton R. Paden, Dhvani Batra, Krista Queen, Kristen Knipe, Dakota Howard, Yvette Unoarumhi, Darlene Wagner, Matthew Schmerer, Ben L. Rambo-Martin, Kristine Lacek, Sam Shepard, Alison Laufer Halpin, Dave Wentworth, Vivien Dugan, Suxiang Tong, Justin Lee                                                                    |
| hCoV-19/USA/AK-CDC-2-4504158/2021    | EPI_ISL_2689869 | 5/16/2021  | AK State Public Health Lab, State Health Department | Centers for Disease Control and Prevention<br>Division of Viral Diseases, Pathogen Discovery | Mili Sheth, Sarah Nobles, Jasmine Padilla, Mark Burroughs, Shoshona Le, Katie Dillon, Peter Cook, Clinton R. Paden, Dhvani Batra, Krista Queen, Kristen Knipe, Dakota Howard, Yvette Unoarumhi, Darlene Wagner, Matthew Schmerer, Ben L. Rambo-Martin, Kristine Lacek, Sam Shepard, Alison Laufer Halpin, Dave Wentworth, Vivien Dugan, Suxiang Tong, Justin Lee                                                                    |
| hCoV-19/USA/AK-CDC-2-4504091/2021    | EPI_ISL_2689872 | 5/14/2021  | AK State Public Health Lab, State Health Department | Centers for Disease Control and Prevention<br>Division of Viral Diseases, Pathogen Discovery | Mili Sheth, Sarah Nobles, Jasmine Padilla, Mark Burroughs, Shoshona Le, Katie Dillon, Peter Cook, Clinton R. Paden, Dhvani Batra, Krista Queen, Kristen Knipe, Dakota Howard, Yvette Unoarumhi, Darlene Wagner, Matthew Schmerer, Ben L. Rambo-Martin, Kristine Lacek, Sam Shepard, Alison Laufer Halpin, Dave Wentworth, Vivien Dugan, Suxiang Tong, Justin Lee                                                                    |
| hCoV-19/USA/AK-CDC-2-4504062/2021    | EPI_ISL_2689873 | 5/16/2021  | AK State Public Health Lab, State Health Department | Centers for Disease Control and Prevention<br>Division of Viral Diseases, Pathogen Discovery | Mili Sheth, Sarah Nobles, Jasmine Padilla, Mark Burroughs, Shoshona Le, Katie Dillon, Peter Cook, Clinton R. Paden, Dhvani Batra, Krista Queen, Kristen Knipe, Dakota Howard, Yvette Unoarumhi, Darlene Wagner, Matthew Schmerer, Ben L. Rambo-Martin, Kristine Lacek, Sam Shepard, Alison Laufer Halpin, Dave Wentworth, Vivien Dugan, Suxiang Tong, Justin Lee                                                                    |
| hCoV-19/USA/AK-PHL6677/2021          | EPI_ISL_2716840 | 1/5/2021   | Alaska State Virology Laboratory                    | Alaska State Virology Laboratory                                                             | Stephanie DeRonde, Elva House, Jacob Zidek, Lisa Smith, Ph.D., Jack Chen, Ph.D.                                                                                                                                                                                                                                                                                                                                                     |
| hCoV-19/USA/AK-PHL6678/2021          | EPI_ISL_2716841 | 1/7/2021   | Alaska State Virology Laboratory                    | Alaska State Virology Laboratory                                                             | Stephanie DeRonde, Elva House, Jacob Zidek, Lisa Smith, Ph.D., Jack Chen, Ph.D.                                                                                                                                                                                                                                                                                                                                                     |
| hCoV-19/USA/AK-PHL6679/2021          | EPI_ISL_2716842 | 1/8/2021   | Alaska State Virology Laboratory                    | Alaska State Virology Laboratory                                                             | Stephanie DeRonde, Elva House, Jacob Zidek, Lisa Smith, Ph.D., Jack Chen, Ph.D.                                                                                                                                                                                                                                                                                                                                                     |
| hCoV-19/USA/AK-PHL6683/2021          | EPI_ISL_2716843 | 1/8/2021   | Alaska State Virology Laboratory                    | Alaska State Virology Laboratory                                                             | Stephanie DeRonde, Elva House, Jacob Zidek, Lisa Smith, Ph.D., Jack Chen, Ph.D.                                                                                                                                                                                                                                                                                                                                                     |
| hCoV-19/USA/AK-PHL8307/2021          | EPI_ISL_1895862 | 4/16/2021  | Alaska State Virology Laboratory                    | Alaska State Virology Laboratory                                                             | Stephanie DeRonde, Elva House, Jacob Zidek, Lisa Smith, Ph.D., Jack Chen, Ph.D.                                                                                                                                                                                                                                                                                                                                                     |
| hCoV-19/USA/AK-PHL8310/2021          | EPI_ISL_1895873 | 4/20/2021  | Alaska State Virology Laboratory                    | Alaska State Virology Laboratory                                                             | Stephanie DeRonde, Elva House, Jacob Zidek, Lisa Smith, Ph.D., Jack Chen, Ph.D.                                                                                                                                                                                                                                                                                                                                                     |
| hCoV-19/USA/AK-PHL8312/2021          | EPI_ISL_1895884 | 4/22/2021  | Alaska State Virology Laboratory                    | Alaska State Virology Laboratory                                                             | Stephanie DeRonde, Elva House, Jacob Zidek, Lisa Smith, Ph.D., Jack Chen, Ph.D.                                                                                                                                                                                                                                                                                                                                                     |
| hCoV-19/USA/AK-PHL8315/2021          | EPI_ISL_1895899 | 4/20/2021  | Alaska State Virology Laboratory                    | Alaska State Virology Laboratory                                                             | Stephanie DeRonde, Elva House, Jacob Zidek, Lisa Smith, Ph.D., Jack Chen, Ph.D.                                                                                                                                                                                                                                                                                                                                                     |
| hCoV-19/USA/AK-PHL8316/2021          | EPI_ISL_1895904 | 4/20/2021  | Alaska State Virology Laboratory                    | Alaska State Virology Laboratory                                                             | Stephanie DeRonde, Elva House, Jacob Zidek, Lisa Smith, Ph.D., Jack Chen, Ph.D.                                                                                                                                                                                                                                                                                                                                                     |
| hCoV-19/USA/AK-PHL8317/2021          | EPI_ISL_1895909 | 4/20/2021  | Alaska State Virology Laboratory                    | Alaska State Virology Laboratory                                                             | Stephanie DeRonde, Elva House, Jacob Zidek, Lisa Smith, Ph.D., Jack Chen, Ph.D.                                                                                                                                                                                                                                                                                                                                                     |
| hCoV-19/USA/AK-PHL8323/2021          | EPI_ISL_1895932 | 4/24/2021  | Alaska State Virology Laboratory                    | Alaska State Virology Laboratory                                                             | Stephanie DeRonde, Elva House, Jacob Zidek, Lisa Smith, Ph.D., Jack Chen, Ph.D.                                                                                                                                                                                                                                                                                                                                                     |
| hCoV-19/USA/AK-PHL8325/2021          | EPI_ISL_1895943 | 4/25/2021  | Alaska State Virology Laboratory                    | Alaska State Virology Laboratory                                                             | Stephanie DeRonde, Elva House, Jacob Zidek, Lisa Smith, Ph.D., Jack Chen, Ph.D.                                                                                                                                                                                                                                                                                                                                                     |
| hCoV-19/USA/AK-PHL8328/2021          | EPI_ISL_1895959 | 4/25/2021  | Alaska State Virology Laboratory                    | Alaska State Virology Laboratory                                                             | Stephanie DeRonde, Elva House, Jacob Zidek, Lisa Smith, Ph.D., Jack Chen, Ph.D.                                                                                                                                                                                                                                                                                                                                                     |
| hCoV-19/USA/AK-PHL8334/2021          | EPI_ISL_1895974 | 4/18/2021  | Alaska State Virology Laboratory                    | Alaska State Virology Laboratory                                                             | Stephanie DeRonde, Elva House, Jacob Zidek, Lisa Smith, Ph.D., Jack Chen, Ph.D.                                                                                                                                                                                                                                                                                                                                                     |
| hCoV-19/USA/AK-PHL8337/2021          | EPI_ISL_1895990 | 4/19/2021  | Alaska State Virology Laboratory                    | Alaska State Virology Laboratory                                                             | Stephanie DeRonde, Elva House, Jacob Zidek, Lisa Smith, Ph.D., Jack Chen, Ph.D.                                                                                                                                                                                                                                                                                                                                                     |
| hCoV-19/USA/AK-PHL8341/2021          | EPI_ISL_1896010 | 4/19/2021  | Alaska State Virology Laboratory                    | Alaska State Virology Laboratory                                                             | Stephanie DeRonde, Elva House, Jacob Zidek, Lisa Smith, Ph.D., Jack Chen, Ph.D.                                                                                                                                                                                                                                                                                                                                                     |
| hCoV-19/USA/AK-PHL8344/2021          | EPI_ISL_1896020 | 4/20/2021  | Alaska State Virology Laboratory                    | Alaska State Virology Laboratory                                                             | Stephanie DeRonde, Elva House, Jacob Zidek, Lisa Smith, Ph.D., Jack Chen, Ph.D.                                                                                                                                                                                                                                                                                                                                                     |
| hCoV-19/USA/AK-PHL8346/2021          | EPI_ISL_1896030 | 4/21/2021  | Alaska State Virology Laboratory                    | Alaska State Virology Laboratory                                                             | Stephanie DeRonde, Elva House, Jacob Zidek, Lisa Smith, Ph.D., Jack Chen, Ph.D.                                                                                                                                                                                                                                                                                                                                                     |
| hCoV-19/USA/AK-CDC-ASC210053159/2021 | EPI_ISL_1900421 | 4/7/2021   | Aegis Sciences Corporation                          | Centers for Disease Control and Prevention<br>Division of Viral Diseases, Pathogen Discovery | Dakota Howard, Dhvani Batra, Peter W. Cook, Kara Moser, Adrian Paskey, Jason Caravas, Benjamin Rambo-Martin, Shatavia Morrison, Christopher Gulvick, Scott Sammons, Yvette Unoarumhi, Darlene Wagner, Matthew Schmerer, Cyndi Clark, Patrick Campbell, Rob Case, Vikramsinha Ghorpade, Holly Houdeshell, Ola Kvalvaag, Dillon Nall, Ethan Sanders, Alec Vest, Shaun Westlund, Matthew Hardison, Clinton R. Paden, Duncan MacCannell |
| hCoV-19/USA/AK-PHL8350/2021          | EPI_ISL_1920963 | 4/19/2021  | Alaska State Virology Laboratory                    | Alaska State Virology Laboratory                                                             | Stephanie DeRonde, Elva House, Jacob Zidek, Lisa Smith, Ph.D., Jack Chen, Ph.D.                                                                                                                                                                                                                                                                                                                                                     |
| hCoV-19/USA/AK-PHL8351/2021          | EPI_ISL_1920964 | 4/23/2021  | Alaska State Virology Laboratory                    | Alaska State Virology Laboratory                                                             | Stephanie DeRonde, Elva House, Jacob Zidek, Lisa Smith, Ph.D., Jack Chen, Ph.D.                                                                                                                                                                                                                                                                                                                                                     |
| hCoV-19/USA/AK-PHL8352/2021          | EPI_ISL_1920965 | 4/23/2021  | Alaska State Virology Laboratory                    | Alaska State Virology Laboratory                                                             | Stephanie DeRonde, Elva House, Jacob Zidek, Lisa Smith, Ph.D., Jack Chen, Ph.D.                                                                                                                                                                                                                                                                                                                                                     |
| hCoV-19/USA/AK-PHL8354/2021          | EPI_ISL_1920966 | 4/23/2021  | Alaska State Virology Laboratory                    | Alaska State Virology Laboratory                                                             | Stephanie DeRonde, Elva House, Jacob Zidek, Lisa Smith, Ph.D., Jack Chen, Ph.D.                                                                                                                                                                                                                                                                                                                                                     |
| hCoV-19/USA/AK-PHL8355/2021          | EPI_ISL_1920967 | 4/19/2021  | Alaska State Virology Laboratory                    | Alaska State Virology Laboratory                                                             | Stephanie DeRonde, Elva House, Jacob Zidek, Lisa Smith, Ph.D., Jack Chen, Ph.D.                                                                                                                                                                                                                                                                                                                                                     |
| hCoV-19/USA/AK-PHL8356/2021          | EPI_ISL_1920968 | 4/19/2021  | Alaska State Virology Laboratory                    | Alaska State Virology Laboratory                                                             | Stephanie DeRonde, Elva House, Jacob Zidek, Lisa Smith, Ph.D., Jack Chen, Ph.D.                                                                                                                                                                                                                                                                                                                                                     |
| hCoV-19/USA/AK-PHL8357/2021          | EPI_ISL_1920969 | 4/24/2021  | Alaska State Virology Laboratory                    | Alaska State Virology Laboratory                                                             | Stephanie DeRonde, Elva House, Jacob Zidek, Lisa Smith, Ph.D., Jack Chen, Ph.D.                                                                                                                                                                                                                                                                                                                                                     |





|                                   |                 |           |                                                     |                                                                                              |                                                                                                                                                                                                                                                                                                                                                                  |
|-----------------------------------|-----------------|-----------|-----------------------------------------------------|----------------------------------------------------------------------------------------------|------------------------------------------------------------------------------------------------------------------------------------------------------------------------------------------------------------------------------------------------------------------------------------------------------------------------------------------------------------------|
| hCoV-19/USA/AK-PHL8501/2021       | EPI_ISL_2008996 | 4/29/2021 | Alaska State Virology Laboratory                    | Alaska State Virology Laboratory                                                             | Stephanie DeRonde, Elva House, Jacob Zidek, Lisa Smith, Ph.D., Jack Chen, Ph.D.                                                                                                                                                                                                                                                                                  |
| hCoV-19/USA/AK-PHL8484/2021       | EPI_ISL_2008997 | 4/28/2021 | Alaska State Virology Laboratory                    | Alaska State Virology Laboratory                                                             | Stephanie DeRonde, Elva House, Jacob Zidek, Lisa Smith, Ph.D., Jack Chen, Ph.D.                                                                                                                                                                                                                                                                                  |
| hCoV-19/USA/AK-PHL8493/2021       | EPI_ISL_2008999 | 4/19/2021 | Alaska State Virology Laboratory                    | Alaska State Virology Laboratory                                                             | Stephanie DeRonde, Elva House, Jacob Zidek, Lisa Smith, Ph.D., Jack Chen, Ph.D.                                                                                                                                                                                                                                                                                  |
| hCoV-19/USA/AK-PHL8494/2021       | EPI_ISL_2009000 | 4/16/2021 | Alaska State Virology Laboratory                    | Alaska State Virology Laboratory                                                             | Stephanie DeRonde, Elva House, Jacob Zidek, Lisa Smith, Ph.D., Jack Chen, Ph.D.                                                                                                                                                                                                                                                                                  |
| hCoV-19/USA/AK-PHL8495/2021       | EPI_ISL_2009001 | 4/19/2021 | Alaska State Virology Laboratory                    | Alaska State Virology Laboratory                                                             | Stephanie DeRonde, Elva House, Jacob Zidek, Lisa Smith, Ph.D., Jack Chen, Ph.D.                                                                                                                                                                                                                                                                                  |
| hCoV-19/USA/AK-PHL8510/2021       | EPI_ISL_2009005 | 5/1/2021  | Alaska State Virology Laboratory                    | Alaska State Virology Laboratory                                                             | Stephanie DeRonde, Elva House, Jacob Zidek, Lisa Smith, Ph.D., Jack Chen, Ph.D.                                                                                                                                                                                                                                                                                  |
| hCoV-19/USA/AK-PHL8511/2021       | EPI_ISL_2009006 | 4/30/2021 | Alaska State Virology Laboratory                    | Alaska State Virology Laboratory                                                             | Stephanie DeRonde, Elva House, Jacob Zidek, Lisa Smith, Ph.D., Jack Chen, Ph.D.                                                                                                                                                                                                                                                                                  |
| hCoV-19/USA/AK-PHL8514/2021       | EPI_ISL_2009007 | 5/1/2021  | Alaska State Virology Laboratory                    | Alaska State Virology Laboratory                                                             | Stephanie DeRonde, Elva House, Jacob Zidek, Lisa Smith, Ph.D., Jack Chen, Ph.D.                                                                                                                                                                                                                                                                                  |
| hCoV-19/USA/AK-PHL8515/2021       | EPI_ISL_2009008 | 5/1/2021  | Alaska State Virology Laboratory                    | Alaska State Virology Laboratory                                                             | Stephanie DeRonde, Elva House, Jacob Zidek, Lisa Smith, Ph.D., Jack Chen, Ph.D.                                                                                                                                                                                                                                                                                  |
| hCoV-19/USA/AK-PHL8516/2021       | EPI_ISL_2009009 | 4/27/2021 | Alaska State Virology Laboratory                    | Alaska State Virology Laboratory                                                             | Stephanie DeRonde, Elva House, Jacob Zidek, Lisa Smith, Ph.D., Jack Chen, Ph.D.                                                                                                                                                                                                                                                                                  |
| hCoV-19/USA/AK-PHL8525/2021       | EPI_ISL_2009013 | 4/30/2021 | Alaska State Virology Laboratory                    | Alaska State Virology Laboratory                                                             | Stephanie DeRonde, Elva House, Jacob Zidek, Lisa Smith, Ph.D., Jack Chen, Ph.D.                                                                                                                                                                                                                                                                                  |
| hCoV-19/USA/AK-PHL8527/2021       | EPI_ISL_2009014 | 4/30/2021 | Alaska State Virology Laboratory                    | Alaska State Virology Laboratory                                                             | Stephanie DeRonde, Elva House, Jacob Zidek, Lisa Smith, Ph.D., Jack Chen, Ph.D.                                                                                                                                                                                                                                                                                  |
| hCoV-19/USA/AK-CDC-2-4306914/2021 | EPI_ISL_2018247 | 4/16/2021 | AK State Public Health Lab, State Health Department | Centers for Disease Control and Prevention<br>Division of Viral Diseases, Pathogen Discovery | Mili Sheth, Sarah Nobles, Jasmine Padilla, Mark Burroughs, Shoshona Le, Katie Dillon, Peter Cook, Clinton R. Paden, Dhvani Batra, Krista Queen, Kristen Knipe, Dakota Howard, Yvette Unoarumhi, Darlene Wagner, Matthew Schmerer, Ben L. Rambo-Martin, Kristine Lacek, Sam Shepard, Alison Laufer Halpin, Dave Wentworth, Vivien Dugan, Suxiang Tong, Justin Lee |
| hCoV-19/USA/AK-CDC-2-4306913/2021 | EPI_ISL_2018248 | 4/18/2021 | AK State Public Health Lab, State Health Department | Centers for Disease Control and Prevention<br>Division of Viral Diseases, Pathogen Discovery | Mili Sheth, Sarah Nobles, Jasmine Padilla, Mark Burroughs, Shoshona Le, Katie Dillon, Peter Cook, Clinton R. Paden, Dhvani Batra, Krista Queen, Kristen Knipe, Dakota Howard, Yvette Unoarumhi, Darlene Wagner, Matthew Schmerer, Ben L. Rambo-Martin, Kristine Lacek, Sam Shepard, Alison Laufer Halpin, Dave Wentworth, Vivien Dugan, Suxiang Tong, Justin Lee |
| hCoV-19/USA/AK-CDC-2-4307102/2021 | EPI_ISL_2018249 | 4/12/2021 | AK State Public Health Lab, State Health Department | Centers for Disease Control and Prevention<br>Division of Viral Diseases, Pathogen Discovery | Mili Sheth, Sarah Nobles, Jasmine Padilla, Mark Burroughs, Shoshona Le, Katie Dillon, Peter Cook, Clinton R. Paden, Dhvani Batra, Krista Queen, Kristen Knipe, Dakota Howard, Yvette Unoarumhi, Darlene Wagner, Matthew Schmerer, Ben L. Rambo-Martin, Kristine Lacek, Sam Shepard, Alison Laufer Halpin, Dave Wentworth, Vivien Dugan, Suxiang Tong, Justin Lee |
| hCoV-19/USA/AK-CDC-2-4307033/2021 | EPI_ISL_2018250 | 4/15/2021 | AK State Public Health Lab, State Health Department | Centers for Disease Control and Prevention<br>Division of Viral Diseases, Pathogen Discovery | Mili Sheth, Sarah Nobles, Jasmine Padilla, Mark Burroughs, Shoshona Le, Katie Dillon, Peter Cook, Clinton R. Paden, Dhvani Batra, Krista Queen, Kristen Knipe, Dakota Howard, Yvette Unoarumhi, Darlene Wagner, Matthew Schmerer, Ben L. Rambo-Martin, Kristine Lacek, Sam Shepard, Alison Laufer Halpin, Dave Wentworth, Vivien Dugan, Suxiang Tong, Justin Lee |
| hCoV-19/USA/AK-CDC-2-4306933/2021 | EPI_ISL_2018251 | 4/12/2021 | AK State Public Health Lab, State Health Department | Centers for Disease Control and Prevention<br>Division of Viral Diseases, Pathogen Discovery | Mili Sheth, Sarah Nobles, Jasmine Padilla, Mark Burroughs, Shoshona Le, Katie Dillon, Peter Cook, Clinton R. Paden, Dhvani Batra, Krista Queen, Kristen Knipe, Dakota Howard, Yvette Unoarumhi, Darlene Wagner, Matthew Schmerer, Ben L. Rambo-Martin, Kristine Lacek, Sam Shepard, Alison Laufer Halpin, Dave Wentworth, Vivien Dugan, Suxiang Tong, Justin Lee |
| hCoV-19/USA/AK-CDC-2-4307032/2021 | EPI_ISL_2018252 | 4/18/2021 | AK State Public Health Lab, State Health Department | Centers for Disease Control and Prevention<br>Division of Viral Diseases, Pathogen Discovery | Mili Sheth, Sarah Nobles, Jasmine Padilla, Mark Burroughs, Shoshona Le, Katie Dillon, Peter Cook, Clinton R. Paden, Dhvani Batra, Krista Queen, Kristen Knipe, Dakota Howard, Yvette Unoarumhi, Darlene Wagner, Matthew Schmerer, Ben L. Rambo-Martin, Kristine Lacek, Sam Shepard, Alison Laufer Halpin, Dave Wentworth, Vivien Dugan, Suxiang Tong, Justin Lee |
| hCoV-19/USA/AK-CDC-2-4307041/2021 | EPI_ISL_2018253 | 4/18/2021 | AK State Public Health Lab, State Health Department | Centers for Disease Control and Prevention<br>Division of Viral Diseases, Pathogen Discovery | Mili Sheth, Sarah Nobles, Jasmine Padilla, Mark Burroughs, Shoshona Le, Katie Dillon, Peter Cook, Clinton R. Paden, Dhvani Batra, Krista Queen, Kristen Knipe, Dakota Howard, Yvette Unoarumhi, Darlene Wagner, Matthew Schmerer, Ben L. Rambo-Martin, Kristine Lacek, Sam Shepard, Alison Laufer Halpin, Dave Wentworth, Vivien Dugan, Suxiang Tong, Justin Lee |
| hCoV-19/USA/AK-CDC-2-4306935/2021 | EPI_ISL_2018254 | 4/18/2021 | AK State Public Health Lab, State Health Department | Centers for Disease Control and Prevention<br>Division of Viral Diseases, Pathogen Discovery | Mili Sheth, Sarah Nobles, Jasmine Padilla, Mark Burroughs, Shoshona Le, Katie Dillon, Peter Cook, Clinton R. Paden, Dhvani Batra, Krista Queen, Kristen Knipe, Dakota Howard, Yvette Unoarumhi, Darlene Wagner, Matthew Schmerer, Ben L. Rambo-Martin, Kristine Lacek, Sam Shepard, Alison Laufer Halpin, Dave Wentworth, Vivien Dugan, Suxiang Tong, Justin Lee |

|                                      |                 |           |                                                     |                                                                                              |                                                                                                                                                                                                                                                                                                                                                                                                                                     |
|--------------------------------------|-----------------|-----------|-----------------------------------------------------|----------------------------------------------------------------------------------------------|-------------------------------------------------------------------------------------------------------------------------------------------------------------------------------------------------------------------------------------------------------------------------------------------------------------------------------------------------------------------------------------------------------------------------------------|
| hCoV-19/USA/AK-CDC-2-4307009/2021    | EPI_ISL_2018255 | 4/21/2021 | AK State Public Health Lab, State Health Department | Centers for Disease Control and Prevention<br>Division of Viral Diseases, Pathogen Discovery | Mili Sheth, Sarah Nobles, Jasmine Padilla, Mark Burroughs, Shoshona Le, Katie Dillon, Peter Cook, Clinton R. Paden, Dhvani Batra, Krista Queen, Kristen Knipe, Dakota Howard, Yvette Unoarumhi, Darlene Wagner, Matthew Schmerer, Ben L. Rambo-Martin, Kristine Lacek, Sam Shepard, Alison Laufer Halpin, Dave Wentworth, Vivien Dugan, Suxiang Tong, Justin Lee                                                                    |
| hCoV-19/USA/AK-CDC-2-4307021/2021    | EPI_ISL_2018256 | 4/20/2021 | AK State Public Health Lab, State Health Department | Centers for Disease Control and Prevention<br>Division of Viral Diseases, Pathogen Discovery | Mili Sheth, Sarah Nobles, Jasmine Padilla, Mark Burroughs, Shoshona Le, Katie Dillon, Peter Cook, Clinton R. Paden, Dhvani Batra, Krista Queen, Kristen Knipe, Dakota Howard, Yvette Unoarumhi, Darlene Wagner, Matthew Schmerer, Ben L. Rambo-Martin, Kristine Lacek, Sam Shepard, Alison Laufer Halpin, Dave Wentworth, Vivien Dugan, Suxiang Tong, Justin Lee                                                                    |
| hCoV-19/USA/AK-CDC-2-4306932/2021    | EPI_ISL_2018257 | 4/18/2021 | AK State Public Health Lab, State Health Department | Centers for Disease Control and Prevention<br>Division of Viral Diseases, Pathogen Discovery | Mili Sheth, Sarah Nobles, Jasmine Padilla, Mark Burroughs, Shoshona Le, Katie Dillon, Peter Cook, Clinton R. Paden, Dhvani Batra, Krista Queen, Kristen Knipe, Dakota Howard, Yvette Unoarumhi, Darlene Wagner, Matthew Schmerer, Ben L. Rambo-Martin, Kristine Lacek, Sam Shepard, Alison Laufer Halpin, Dave Wentworth, Vivien Dugan, Suxiang Tong, Justin Lee                                                                    |
| hCoV-19/USA/AK-CDC-2-4307016/2021    | EPI_ISL_2018258 | 4/12/2021 | AK State Public Health Lab, State Health Department | Centers for Disease Control and Prevention<br>Division of Viral Diseases, Pathogen Discovery | Mili Sheth, Sarah Nobles, Jasmine Padilla, Mark Burroughs, Shoshona Le, Katie Dillon, Peter Cook, Clinton R. Paden, Dhvani Batra, Krista Queen, Kristen Knipe, Dakota Howard, Yvette Unoarumhi, Darlene Wagner, Matthew Schmerer, Ben L. Rambo-Martin, Kristine Lacek, Sam Shepard, Alison Laufer Halpin, Dave Wentworth, Vivien Dugan, Suxiang Tong, Justin Lee                                                                    |
| hCoV-19/USA/AK-CDC-2-4306946/2021    | EPI_ISL_2018260 | 4/11/2021 | AK State Public Health Lab, State Health Department | Centers for Disease Control and Prevention<br>Division of Viral Diseases, Pathogen Discovery | Mili Sheth, Sarah Nobles, Jasmine Padilla, Mark Burroughs, Shoshona Le, Katie Dillon, Peter Cook, Clinton R. Paden, Dhvani Batra, Krista Queen, Kristen Knipe, Dakota Howard, Yvette Unoarumhi, Darlene Wagner, Matthew Schmerer, Ben L. Rambo-Martin, Kristine Lacek, Sam Shepard, Alison Laufer Halpin, Dave Wentworth, Vivien Dugan, Suxiang Tong, Justin Lee                                                                    |
| hCoV-19/USA/AK-CDC-2-4306943/2021    | EPI_ISL_2018261 | 4/16/2021 | AK State Public Health Lab, State Health Department | Centers for Disease Control and Prevention<br>Division of Viral Diseases, Pathogen Discovery | Mili Sheth, Sarah Nobles, Jasmine Padilla, Mark Burroughs, Shoshona Le, Katie Dillon, Peter Cook, Clinton R. Paden, Dhvani Batra, Krista Queen, Kristen Knipe, Dakota Howard, Yvette Unoarumhi, Darlene Wagner, Matthew Schmerer, Ben L. Rambo-Martin, Kristine Lacek, Sam Shepard, Alison Laufer Halpin, Dave Wentworth, Vivien Dugan, Suxiang Tong, Justin Lee                                                                    |
| hCoV-19/USA/AK-CDC-2-4307040/2021    | EPI_ISL_2018262 | 4/16/2021 | AK State Public Health Lab, State Health Department | Centers for Disease Control and Prevention<br>Division of Viral Diseases, Pathogen Discovery | Mili Sheth, Sarah Nobles, Jasmine Padilla, Mark Burroughs, Shoshona Le, Katie Dillon, Peter Cook, Clinton R. Paden, Dhvani Batra, Krista Queen, Kristen Knipe, Dakota Howard, Yvette Unoarumhi, Darlene Wagner, Matthew Schmerer, Ben L. Rambo-Martin, Kristine Lacek, Sam Shepard, Alison Laufer Halpin, Dave Wentworth, Vivien Dugan, Suxiang Tong, Justin Lee                                                                    |
| hCoV-19/USA/AK-CDC-2-4306944/2021    | EPI_ISL_2018263 | 4/19/2021 | AK State Public Health Lab, State Health Department | Centers for Disease Control and Prevention<br>Division of Viral Diseases, Pathogen Discovery | Mili Sheth, Sarah Nobles, Jasmine Padilla, Mark Burroughs, Shoshona Le, Katie Dillon, Peter Cook, Clinton R. Paden, Dhvani Batra, Krista Queen, Kristen Knipe, Dakota Howard, Yvette Unoarumhi, Darlene Wagner, Matthew Schmerer, Ben L. Rambo-Martin, Kristine Lacek, Sam Shepard, Alison Laufer Halpin, Dave Wentworth, Vivien Dugan, Suxiang Tong, Justin Lee                                                                    |
| hCoV-19/USA/AK-PHL8674/2021          | EPI_ISL_2213219 | 4/29/2021 | Alaska State Virology Laboratory                    | Alaska State Virology Laboratory                                                             | Stephanie DeRonde, Elva House, Jacob Zidek, Lisa Smith, Ph.D., Jack Chen, Ph.D.                                                                                                                                                                                                                                                                                                                                                     |
| hCoV-19/USA/AK-CDC-ASC210074931/2021 | EPI_ISL_2042407 | 4/18/2021 | Aegis Sciences Corporation                          | Centers for Disease Control and Prevention<br>Division of Viral Diseases, Pathogen Discovery | Dakota Howard, Dhvani Batra, Peter W. Cook, Kara Moser, Adrian Paskey, Jason Caravas, Benjamin Rambo-Martin, Shatavia Morrison, Christopher Gulvick, Scott Sammons, Yvette Unoarumhi, Darlene Wagner, Matthew Schmerer, Cyndi Clark, Patrick Campbell, Rob Case, Vikramsinha Ghorpade, Holly Houdeshell, Ola Kvalvaag, Dillon Nall, Ethan Sanders, Alec Vest, Shaun Westlund, Matthew Hardison, Clinton R. Paden, Duncan MacCannell |

|                                   |                 |           |                                   |                                                                                              |                                                                                                                                                                                                                                                                                                                                                                                                                                                                                                                                                                                                                                                                                                                                                                                                                                                                                                                                                                                                                                                  |
|-----------------------------------|-----------------|-----------|-----------------------------------|----------------------------------------------------------------------------------------------|--------------------------------------------------------------------------------------------------------------------------------------------------------------------------------------------------------------------------------------------------------------------------------------------------------------------------------------------------------------------------------------------------------------------------------------------------------------------------------------------------------------------------------------------------------------------------------------------------------------------------------------------------------------------------------------------------------------------------------------------------------------------------------------------------------------------------------------------------------------------------------------------------------------------------------------------------------------------------------------------------------------------------------------------------|
| hCoV-19/USA/AK-CDC-LC0056023/2021 | EPI_ISL_2046163 | 4/28/2021 | Laboratory Corporation of America | Centers for Disease Control and Prevention<br>Division of Viral Diseases, Pathogen Discovery | Dakota Howard, Dhvani Batra, Peter W. Cook, Kara Moser, Adrian Paskey, Jason Caravas, Benjamin Rambo-Martin, Shatavia Morrison, Christopher Gulwick, Scott Sammons, Yvette Unoarumhi, Darlene Wagner, Matthew Schmeer, Minoos Agarwal, Eyad Almasri, Debbie Boles, Ayla Burns, Nuthawin Charoensri, Oren Cohen, Susan Countryman, Mary Ann Cristobal, Bobbi Croy, Suzanne Dale, Hrushikesh Deshmukh, Amanda Douglas, Vincent Drouillon, Marcia Eisenberg, Howard Engler, Rama Ghatti, Prashant Gupta, Susan Hicks, Jake Humphrey, Lax Iyer, Manoj Jain, Mohan Kolli, Brian Krueger, Tim Kuphal, Stanley Letovsky, Michael Levandoski, Craig Lukaski, Jonathan Meltzer, Brian Norvell, Mindy Nye, Scott Parker, Christos Petropoulos, John Pruitt, Steven Ragan, Scott Ryan, Mike Sapeta, Jana Schroth, Suresh Babu Selvaraju, Goran Stevovic, Amanda Suchanek, Andrea Throop, Lyndon Tilson, Thomas Urban, Joe Voshell, Kimberly Wagner, Jonathan Williams, Mary Williamson, Qian Zeng, Tricia Zwiefelhofer, Clinton R. Paden, Duncan MacCannell |
| hCoV-19/USA/AK-PHL8530/2021       | EPI_ISL_2101749 | 5/3/2021  | Alaska State Virology Laboratory  | Alaska State Virology Laboratory                                                             | Stephanie DeRonde, Elva House, Jacob Zidek, Lisa Smith, Ph.D., Jack Chen, Ph.D.                                                                                                                                                                                                                                                                                                                                                                                                                                                                                                                                                                                                                                                                                                                                                                                                                                                                                                                                                                  |
| hCoV-19/USA/AK-PHL8535/2021       | EPI_ISL_2101750 | 5/3/2021  | Alaska State Virology Laboratory  | Alaska State Virology Laboratory                                                             | Stephanie DeRonde, Elva House, Jacob Zidek, Lisa Smith, Ph.D., Jack Chen, Ph.D.                                                                                                                                                                                                                                                                                                                                                                                                                                                                                                                                                                                                                                                                                                                                                                                                                                                                                                                                                                  |
| hCoV-19/USA/AK-PHL8571/2021       | EPI_ISL_2101752 | 5/2/2021  | Alaska State Virology Laboratory  | Alaska State Virology Laboratory                                                             | Stephanie DeRonde, Elva House, Jacob Zidek, Lisa Smith, Ph.D., Jack Chen, Ph.D.                                                                                                                                                                                                                                                                                                                                                                                                                                                                                                                                                                                                                                                                                                                                                                                                                                                                                                                                                                  |
| hCoV-19/USA/AK-PHL8531/2021       | EPI_ISL_2101753 | 5/4/2021  | Alaska State Virology Laboratory  | Alaska State Virology Laboratory                                                             | Stephanie DeRonde, Elva House, Jacob Zidek, Lisa Smith, Ph.D., Jack Chen, Ph.D.                                                                                                                                                                                                                                                                                                                                                                                                                                                                                                                                                                                                                                                                                                                                                                                                                                                                                                                                                                  |
| hCoV-19/USA/AK-PHL8532/2021       | EPI_ISL_2101754 | 5/1/2021  | Alaska State Virology Laboratory  | Alaska State Virology Laboratory                                                             | Stephanie DeRonde, Elva House, Jacob Zidek, Lisa Smith, Ph.D., Jack Chen, Ph.D.                                                                                                                                                                                                                                                                                                                                                                                                                                                                                                                                                                                                                                                                                                                                                                                                                                                                                                                                                                  |
| hCoV-19/USA/AK-PHL8537/2021       | EPI_ISL_2101755 | 5/2/2021  | Alaska State Virology Laboratory  | Alaska State Virology Laboratory                                                             | Stephanie DeRonde, Elva House, Jacob Zidek, Lisa Smith, Ph.D., Jack Chen, Ph.D.                                                                                                                                                                                                                                                                                                                                                                                                                                                                                                                                                                                                                                                                                                                                                                                                                                                                                                                                                                  |
| hCoV-19/USA/AK-PHL8540/2021       | EPI_ISL_2101756 | 4/17/2021 | Alaska State Virology Laboratory  | Alaska State Virology Laboratory                                                             | Stephanie DeRonde, Elva House, Jacob Zidek, Lisa Smith, Ph.D., Jack Chen, Ph.D.                                                                                                                                                                                                                                                                                                                                                                                                                                                                                                                                                                                                                                                                                                                                                                                                                                                                                                                                                                  |
| hCoV-19/USA/AK-PHL8538/2021       | EPI_ISL_2101758 | 5/2/2021  | Alaska State Virology Laboratory  | Alaska State Virology Laboratory                                                             | Stephanie DeRonde, Elva House, Jacob Zidek, Lisa Smith, Ph.D., Jack Chen, Ph.D.                                                                                                                                                                                                                                                                                                                                                                                                                                                                                                                                                                                                                                                                                                                                                                                                                                                                                                                                                                  |
| hCoV-19/USA/AK-PHL8564/2021       | EPI_ISL_2101759 | 5/3/2021  | Alaska State Virology Laboratory  | Alaska State Virology Laboratory                                                             | Stephanie DeRonde, Elva House, Jacob Zidek, Lisa Smith, Ph.D., Jack Chen, Ph.D.                                                                                                                                                                                                                                                                                                                                                                                                                                                                                                                                                                                                                                                                                                                                                                                                                                                                                                                                                                  |
| hCoV-19/USA/AK-PHL8536/2021       | EPI_ISL_2101760 | 5/3/2021  | Alaska State Virology Laboratory  | Alaska State Virology Laboratory                                                             | Stephanie DeRonde, Elva House, Jacob Zidek, Lisa Smith, Ph.D., Jack Chen, Ph.D.                                                                                                                                                                                                                                                                                                                                                                                                                                                                                                                                                                                                                                                                                                                                                                                                                                                                                                                                                                  |
| hCoV-19/USA/AK-PHL8552/2021       | EPI_ISL_2101761 | 4/29/2021 | Alaska State Virology Laboratory  | Alaska State Virology Laboratory                                                             | Stephanie DeRonde, Elva House, Jacob Zidek, Lisa Smith, Ph.D., Jack Chen, Ph.D.                                                                                                                                                                                                                                                                                                                                                                                                                                                                                                                                                                                                                                                                                                                                                                                                                                                                                                                                                                  |
| hCoV-19/USA/AK-PHL8553/2021       | EPI_ISL_2101762 | 4/29/2021 | Alaska State Virology Laboratory  | Alaska State Virology Laboratory                                                             | Stephanie DeRonde, Elva House, Jacob Zidek, Lisa Smith, Ph.D., Jack Chen, Ph.D.                                                                                                                                                                                                                                                                                                                                                                                                                                                                                                                                                                                                                                                                                                                                                                                                                                                                                                                                                                  |
| hCoV-19/USA/AK-PHL8555/2021       | EPI_ISL_2101763 | 4/30/2021 | Alaska State Virology Laboratory  | Alaska State Virology Laboratory                                                             | Stephanie DeRonde, Elva House, Jacob Zidek, Lisa Smith, Ph.D., Jack Chen, Ph.D.                                                                                                                                                                                                                                                                                                                                                                                                                                                                                                                                                                                                                                                                                                                                                                                                                                                                                                                                                                  |
| hCoV-19/USA/AK-PHL8539/2021       | EPI_ISL_2101764 | 5/2/2021  | Alaska State Virology Laboratory  | Alaska State Virology Laboratory                                                             | Stephanie DeRonde, Elva House, Jacob Zidek, Lisa Smith, Ph.D., Jack Chen, Ph.D.                                                                                                                                                                                                                                                                                                                                                                                                                                                                                                                                                                                                                                                                                                                                                                                                                                                                                                                                                                  |
| hCoV-19/USA/AK-PHL8542/2021       | EPI_ISL_2101766 | 4/12/2021 | Alaska State Virology Laboratory  | Alaska State Virology Laboratory                                                             | Stephanie DeRonde, Elva House, Jacob Zidek, Lisa Smith, Ph.D., Jack Chen, Ph.D.                                                                                                                                                                                                                                                                                                                                                                                                                                                                                                                                                                                                                                                                                                                                                                                                                                                                                                                                                                  |
| hCoV-19/USA/AK-PHL8548/2021       | EPI_ISL_2101767 | 4/30/2021 | Alaska State Virology Laboratory  | Alaska State Virology Laboratory                                                             | Stephanie DeRonde, Elva House, Jacob Zidek, Lisa Smith, Ph.D., Jack Chen, Ph.D.                                                                                                                                                                                                                                                                                                                                                                                                                                                                                                                                                                                                                                                                                                                                                                                                                                                                                                                                                                  |
| hCoV-19/USA/AK-PHL8551/2021       | EPI_ISL_2101768 | 4/29/2021 | Alaska State Virology Laboratory  | Alaska State Virology Laboratory                                                             | Stephanie DeRonde, Elva House, Jacob Zidek, Lisa Smith, Ph.D., Jack Chen, Ph.D.                                                                                                                                                                                                                                                                                                                                                                                                                                                                                                                                                                                                                                                                                                                                                                                                                                                                                                                                                                  |
| hCoV-19/USA/AK-PHL8556/2021       | EPI_ISL_2101770 | 4/30/2021 | Alaska State Virology Laboratory  | Alaska State Virology Laboratory                                                             | Stephanie DeRonde, Elva House, Jacob Zidek, Lisa Smith, Ph.D., Jack Chen, Ph.D.                                                                                                                                                                                                                                                                                                                                                                                                                                                                                                                                                                                                                                                                                                                                                                                                                                                                                                                                                                  |
| hCoV-19/USA/AK-PHL8558/2021       | EPI_ISL_2101771 | 4/29/2021 | Alaska State Virology Laboratory  | Alaska State Virology Laboratory                                                             | Stephanie DeRonde, Elva House, Jacob Zidek, Lisa Smith, Ph.D., Jack Chen, Ph.D.                                                                                                                                                                                                                                                                                                                                                                                                                                                                                                                                                                                                                                                                                                                                                                                                                                                                                                                                                                  |
| hCoV-19/USA/AK-PHL8559/2021       | EPI_ISL_2101772 | 4/29/2021 | Alaska State Virology Laboratory  | Alaska State Virology Laboratory                                                             | Stephanie DeRonde, Elva House, Jacob Zidek, Lisa Smith, Ph.D., Jack Chen, Ph.D.                                                                                                                                                                                                                                                                                                                                                                                                                                                                                                                                                                                                                                                                                                                                                                                                                                                                                                                                                                  |
| hCoV-19/USA/AK-PHL8560/2021       | EPI_ISL_2101773 | 5/1/2021  | Alaska State Virology Laboratory  | Alaska State Virology Laboratory                                                             | Stephanie DeRonde, Elva House, Jacob Zidek, Lisa Smith, Ph.D., Jack Chen, Ph.D.                                                                                                                                                                                                                                                                                                                                                                                                                                                                                                                                                                                                                                                                                                                                                                                                                                                                                                                                                                  |
| hCoV-19/USA/AK-PHL8563/2021       | EPI_ISL_2101774 | 5/2/2021  | Alaska State Virology Laboratory  | Alaska State Virology Laboratory                                                             | Stephanie DeRonde, Elva House, Jacob Zidek, Lisa Smith, Ph.D., Jack Chen, Ph.D.                                                                                                                                                                                                                                                                                                                                                                                                                                                                                                                                                                                                                                                                                                                                                                                                                                                                                                                                                                  |
| hCoV-19/USA/AK-PHL8565/2021       | EPI_ISL_2101775 | 4/30/2021 | Alaska State Virology Laboratory  | Alaska State Virology Laboratory                                                             | Stephanie DeRonde, Elva House, Jacob Zidek, Lisa Smith, Ph.D., Jack Chen, Ph.D.                                                                                                                                                                                                                                                                                                                                                                                                                                                                                                                                                                                                                                                                                                                                                                                                                                                                                                                                                                  |
| hCoV-19/USA/AK-PHL8566/2021       | EPI_ISL_2101776 | 5/2/2021  | Alaska State Virology Laboratory  | Alaska State Virology Laboratory                                                             | Stephanie DeRonde, Elva House, Jacob Zidek, Lisa Smith, Ph.D., Jack Chen, Ph.D.                                                                                                                                                                                                                                                                                                                                                                                                                                                                                                                                                                                                                                                                                                                                                                                                                                                                                                                                                                  |
| hCoV-19/USA/AK-PHL8572/2021       | EPI_ISL_2101777 | 5/2/2021  | Alaska State Virology Laboratory  | Alaska State Virology Laboratory                                                             | Stephanie DeRonde, Elva House, Jacob Zidek, Lisa Smith, Ph.D., Jack Chen, Ph.D.                                                                                                                                                                                                                                                                                                                                                                                                                                                                                                                                                                                                                                                                                                                                                                                                                                                                                                                                                                  |
| hCoV-19/USA/AK-PHL8573/2021       | EPI_ISL_2101778 | 5/1/2021  | Alaska State Virology Laboratory  | Alaska State Virology Laboratory                                                             | Stephanie DeRonde, Elva House, Jacob Zidek, Lisa Smith, Ph.D., Jack Chen, Ph.D.                                                                                                                                                                                                                                                                                                                                                                                                                                                                                                                                                                                                                                                                                                                                                                                                                                                                                                                                                                  |
| hCoV-19/USA/AK-PHL8683/2021       | EPI_ISL_2136429 | 5/6/2021  | Alaska State Virology Laboratory  | Alaska State Virology Laboratory                                                             | Stephanie DeRonde, Elva House, Jacob Zidek, Lisa Smith, Ph.D., Jack Chen, Ph.D.                                                                                                                                                                                                                                                                                                                                                                                                                                                                                                                                                                                                                                                                                                                                                                                                                                                                                                                                                                  |
| hCoV-19/USA/AK-PHL8684/2021       | EPI_ISL_2136430 | 5/6/2021  | Alaska State Virology Laboratory  | Alaska State Virology Laboratory                                                             | Stephanie DeRonde, Elva House, Jacob Zidek, Lisa Smith, Ph.D., Jack Chen, Ph.D.                                                                                                                                                                                                                                                                                                                                                                                                                                                                                                                                                                                                                                                                                                                                                                                                                                                                                                                                                                  |
| hCoV-19/USA/AK-PHL8688/2021       | EPI_ISL_2136434 | 5/6/2021  | Alaska State Virology Laboratory  | Alaska State Virology Laboratory                                                             | Stephanie DeRonde, Elva House, Jacob Zidek, Lisa Smith, Ph.D., Jack Chen, Ph.D.                                                                                                                                                                                                                                                                                                                                                                                                                                                                                                                                                                                                                                                                                                                                                                                                                                                                                                                                                                  |
| hCoV-19/USA/AK-PHL8690/2021       | EPI_ISL_2136435 | 5/8/2021  | Alaska State Virology Laboratory  | Alaska State Virology Laboratory                                                             | Stephanie DeRonde, Elva House, Jacob Zidek, Lisa Smith, Ph.D., Jack Chen, Ph.D.                                                                                                                                                                                                                                                                                                                                                                                                                                                                                                                                                                                                                                                                                                                                                                                                                                                                                                                                                                  |
| hCoV-19/USA/AK-PHL8691/2021       | EPI_ISL_2136436 | 5/6/2021  | Alaska State Virology Laboratory  | Alaska State Virology Laboratory                                                             | Stephanie DeRonde, Elva House, Jacob Zidek, Lisa Smith, Ph.D., Jack Chen, Ph.D.                                                                                                                                                                                                                                                                                                                                                                                                                                                                                                                                                                                                                                                                                                                                                                                                                                                                                                                                                                  |
| hCoV-19/USA/AK-PHL8695/2021       | EPI_ISL_2136440 | 5/6/2021  | Alaska State Virology Laboratory  | Alaska State Virology Laboratory                                                             | Stephanie DeRonde, Elva House, Jacob Zidek, Lisa Smith, Ph.D., Jack Chen, Ph.D.                                                                                                                                                                                                                                                                                                                                                                                                                                                                                                                                                                                                                                                                                                                                                                                                                                                                                                                                                                  |
| hCoV-19/USA/AK-PHL8697/2021       | EPI_ISL_2136442 | 5/6/2021  | Alaska State Virology Laboratory  | Alaska State Virology Laboratory                                                             | Stephanie DeRonde, Elva House, Jacob Zidek, Lisa Smith, Ph.D., Jack Chen, Ph.D.                                                                                                                                                                                                                                                                                                                                                                                                                                                                                                                                                                                                                                                                                                                                                                                                                                                                                                                                                                  |
| hCoV-19/USA/AK-PHL8698/2021       | EPI_ISL_2136443 | 5/6/2021  | Alaska State Virology Laboratory  | Alaska State Virology Laboratory                                                             | Stephanie DeRonde, Elva House, Jacob Zidek, Lisa Smith, Ph.D., Jack Chen, Ph.D.                                                                                                                                                                                                                                                                                                                                                                                                                                                                                                                                                                                                                                                                                                                                                                                                                                                                                                                                                                  |
| hCoV-19/USA/AK-PHL8699/2021       | EPI_ISL_2136444 | 5/6/2021  | Alaska State Virology Laboratory  | Alaska State Virology Laboratory                                                             | Stephanie DeRonde, Elva House, Jacob Zidek, Lisa Smith, Ph.D., Jack Chen, Ph.D.                                                                                                                                                                                                                                                                                                                                                                                                                                                                                                                                                                                                                                                                                                                                                                                                                                                                                                                                                                  |
| hCoV-19/USA/AK-PHL8703/2021       | EPI_ISL_2136446 | 5/7/2021  | Alaska State Virology Laboratory  | Alaska State Virology Laboratory                                                             | Stephanie DeRonde, Elva House, Jacob Zidek, Lisa Smith, Ph.D., Jack Chen, Ph.D.                                                                                                                                                                                                                                                                                                                                                                                                                                                                                                                                                                                                                                                                                                                                                                                                                                                                                                                                                                  |
| hCoV-19/USA/AK-PHL8706/2021       | EPI_ISL_2136448 | 5/8/2021  | Alaska State Virology Laboratory  | Alaska State Virology Laboratory                                                             | Stephanie DeRonde, Elva House, Jacob Zidek, Lisa Smith, Ph.D., Jack Chen, Ph.D.                                                                                                                                                                                                                                                                                                                                                                                                                                                                                                                                                                                                                                                                                                                                                                                                                                                                                                                                                                  |
| hCoV-19/USA/AK-PHL8707/2021       | EPI_ISL_2136449 | 5/8/2021  | Alaska State Virology Laboratory  | Alaska State Virology Laboratory                                                             | Stephanie DeRonde, Elva House, Jacob Zidek, Lisa Smith, Ph.D., Jack Chen, Ph.D.                                                                                                                                                                                                                                                                                                                                                                                                                                                                                                                                                                                                                                                                                                                                                                                                                                                                                                                                                                  |







|                                      |                 |           |                                   |                                                                                              |                                                                                                                                                                                                                                                                                                                                                                                                                                                                                                                                                                                                                                                                                                                                                                                                                                                                                                                                                                                                                                                |
|--------------------------------------|-----------------|-----------|-----------------------------------|----------------------------------------------------------------------------------------------|------------------------------------------------------------------------------------------------------------------------------------------------------------------------------------------------------------------------------------------------------------------------------------------------------------------------------------------------------------------------------------------------------------------------------------------------------------------------------------------------------------------------------------------------------------------------------------------------------------------------------------------------------------------------------------------------------------------------------------------------------------------------------------------------------------------------------------------------------------------------------------------------------------------------------------------------------------------------------------------------------------------------------------------------|
| hCoV-19/USA/AK-PHL8763/2021          | EPI_ISL_2154077 | 5/10/2021 | Alaska State Virology Laboratory  | Alaska State Virology Laboratory                                                             | Stephanie DeRonde, Elva House, Jacob Zidek, Lisa Smith, Ph.D., Jack Chen, Ph.D.                                                                                                                                                                                                                                                                                                                                                                                                                                                                                                                                                                                                                                                                                                                                                                                                                                                                                                                                                                |
| hCoV-19/USA/AK-PHL8764/2021          | EPI_ISL_2154078 | 5/10/2021 | Alaska State Virology Laboratory  | Alaska State Virology Laboratory                                                             | Stephanie DeRonde, Elva House, Jacob Zidek, Lisa Smith, Ph.D., Jack Chen, Ph.D.                                                                                                                                                                                                                                                                                                                                                                                                                                                                                                                                                                                                                                                                                                                                                                                                                                                                                                                                                                |
| hCoV-19/USA/AK-PHL8765/2021          | EPI_ISL_2154079 | 5/10/2021 | Alaska State Virology Laboratory  | Alaska State Virology Laboratory                                                             | Stephanie DeRonde, Elva House, Jacob Zidek, Lisa Smith, Ph.D., Jack Chen, Ph.D.                                                                                                                                                                                                                                                                                                                                                                                                                                                                                                                                                                                                                                                                                                                                                                                                                                                                                                                                                                |
| hCoV-19/USA/AK-PHL8766/2021          | EPI_ISL_2154080 | 5/10/2021 | Alaska State Virology Laboratory  | Alaska State Virology Laboratory                                                             | Stephanie DeRonde, Elva House, Jacob Zidek, Lisa Smith, Ph.D., Jack Chen, Ph.D.                                                                                                                                                                                                                                                                                                                                                                                                                                                                                                                                                                                                                                                                                                                                                                                                                                                                                                                                                                |
| hCoV-19/USA/AK-PHL8767/2021          | EPI_ISL_2154081 | 5/9/2021  | Alaska State Virology Laboratory  | Alaska State Virology Laboratory                                                             | Stephanie DeRonde, Elva House, Jacob Zidek, Lisa Smith, Ph.D., Jack Chen, Ph.D.                                                                                                                                                                                                                                                                                                                                                                                                                                                                                                                                                                                                                                                                                                                                                                                                                                                                                                                                                                |
| hCoV-19/USA/AK-PHL8768/2021          | EPI_ISL_2154082 | 5/10/2021 | Alaska State Virology Laboratory  | Alaska State Virology Laboratory                                                             | Stephanie DeRonde, Elva House, Jacob Zidek, Lisa Smith, Ph.D., Jack Chen, Ph.D.                                                                                                                                                                                                                                                                                                                                                                                                                                                                                                                                                                                                                                                                                                                                                                                                                                                                                                                                                                |
| hCoV-19/USA/AK-PHL8771/2021          | EPI_ISL_2154084 | 5/11/2021 | Alaska State Virology Laboratory  | Alaska State Virology Laboratory                                                             | Stephanie DeRonde, Elva House, Jacob Zidek, Lisa Smith, Ph.D., Jack Chen, Ph.D.                                                                                                                                                                                                                                                                                                                                                                                                                                                                                                                                                                                                                                                                                                                                                                                                                                                                                                                                                                |
| hCoV-19/USA/AK-PHL8772/2021          | EPI_ISL_2154085 | 5/10/2021 | Alaska State Virology Laboratory  | Alaska State Virology Laboratory                                                             | Stephanie DeRonde, Elva House, Jacob Zidek, Lisa Smith, Ph.D., Jack Chen, Ph.D.                                                                                                                                                                                                                                                                                                                                                                                                                                                                                                                                                                                                                                                                                                                                                                                                                                                                                                                                                                |
| hCoV-19/USA/AK-PHL8773/2021          | EPI_ISL_2154086 | 5/11/2021 | Alaska State Virology Laboratory  | Alaska State Virology Laboratory                                                             | Stephanie DeRonde, Elva House, Jacob Zidek, Lisa Smith, Ph.D., Jack Chen, Ph.D.                                                                                                                                                                                                                                                                                                                                                                                                                                                                                                                                                                                                                                                                                                                                                                                                                                                                                                                                                                |
| hCoV-19/USA/AK-PHL8774/2021          | EPI_ISL_2154087 | 5/10/2021 | Alaska State Virology Laboratory  | Alaska State Virology Laboratory                                                             | Stephanie DeRonde, Elva House, Jacob Zidek, Lisa Smith, Ph.D., Jack Chen, Ph.D.                                                                                                                                                                                                                                                                                                                                                                                                                                                                                                                                                                                                                                                                                                                                                                                                                                                                                                                                                                |
| hCoV-19/USA/AK-PHL8689/2021          | EPI_ISL_2158264 | 5/6/2021  | Alaska State Virology Laboratory  | Alaska State Virology Laboratory                                                             | Stephanie DeRonde, Elva House, Jacob Zidek, Lisa Smith, Ph.D., Jack Chen, Ph.D.                                                                                                                                                                                                                                                                                                                                                                                                                                                                                                                                                                                                                                                                                                                                                                                                                                                                                                                                                                |
| hCoV-19/USA/AK-PHL8756/2021          | EPI_ISL_2158265 | 5/10/2021 | Alaska State Virology Laboratory  | Alaska State Virology Laboratory                                                             | Stephanie DeRonde, Elva House, Jacob Zidek, Lisa Smith, Ph.D., Jack Chen, Ph.D.                                                                                                                                                                                                                                                                                                                                                                                                                                                                                                                                                                                                                                                                                                                                                                                                                                                                                                                                                                |
| hCoV-19/USA/AK-PHL8737/2021          | EPI_ISL_2158266 | 5/8/2021  | Alaska State Virology Laboratory  | Alaska State Virology Laboratory                                                             | Stephanie DeRonde, Elva House, Jacob Zidek, Lisa Smith, Ph.D., Jack Chen, Ph.D.                                                                                                                                                                                                                                                                                                                                                                                                                                                                                                                                                                                                                                                                                                                                                                                                                                                                                                                                                                |
| hCoV-19/USA/AK-PHL8759/2021          | EPI_ISL_2158267 | 5/10/2021 | Alaska State Virology Laboratory  | Alaska State Virology Laboratory                                                             | Stephanie DeRonde, Elva House, Jacob Zidek, Lisa Smith, Ph.D., Jack Chen, Ph.D.                                                                                                                                                                                                                                                                                                                                                                                                                                                                                                                                                                                                                                                                                                                                                                                                                                                                                                                                                                |
| hCoV-19/USA/AK-PHL8731/2021          | EPI_ISL_2158268 | 5/9/2021  | Alaska State Virology Laboratory  | Alaska State Virology Laboratory                                                             | Stephanie DeRonde, Elva House, Jacob Zidek, Lisa Smith, Ph.D., Jack Chen, Ph.D.                                                                                                                                                                                                                                                                                                                                                                                                                                                                                                                                                                                                                                                                                                                                                                                                                                                                                                                                                                |
| hCoV-19/USA/AK-CDC-LC0059338/2021    | EPI_ISL_2185465 | 5/9/2021  | Laboratory Corporation of America | Centers for Disease Control and Prevention<br>Division of Viral Diseases, Pathogen Discovery | Dakota Howard, Dhvani Batra, Peter W. Cook, Kara Moser, Adrian Paskey, Jason Caravas, Benjamin Rambo-Martin, Shatavia Morrison, Christopher Gulvick, Scott Sammons, Yvette Unoarumhi, Darlene Wagner, Matthew Schmeer, Mino Agarwal, Eyad Almasri, Debbie Boles, Ayla Burns, Nuthawin Charoensri, Oren Cohen, Susan Countryman, Mary Ann Cristobal, Bobbi Croy, Suzanne Dale, Hrushikesh Deshmukh, Amanda Douglas, Vincent Drouillon, Marcia Eisenberg, Howard Engler, Rama Ghanti, Prashant Gupta, Susan Hicks, Jake Humphrey, Lax Iyer, Manoj Jain, Mohan Kolli, Brian Krueger, Tim Kuphal, Stanley Letovsky, Michael Levandoski, Craig Lukasik, Jonathan Meltzer, Brian Norvell, Mindy Nye, Scott Parker, Christos Petropoulos, John Pruitt, Steven Ragan, Scott Ryan, Mike Sapeta, Jana Schroth, Suresh Babu Selvaraju, Goran Stevovic, Amanda Suchanek, Andrea Throop, Lyndon Tilson, Thomas Urban, Joe Voshell, Kimberly Wagner, Jonathan Williams, Mary Williamson, Qian Zeng, Tricia Zwiefelhofer, Clinton R. Paden, Duncan MacCannell |
| hCoV-19/USA/AK-CDC-ASC210008123/2021 | EPI_ISL_2185980 | 3/16/2021 | Aegis Sciences Corporation        | Centers for Disease Control and Prevention<br>Division of Viral Diseases, Pathogen Discovery | Dakota Howard, Dhvani Batra, Peter W. Cook, Kara Moser, Adrian Paskey, Jason Caravas, Benjamin Rambo-Martin, Shatavia Morrison, Christopher Gulvick, Scott Sammons, Yvette Unoarumhi, Darlene Wagner, Matthew Schmeer, Cyndi Clark, Patrick Campbell, Rob Case, Vikramsinh Ghorpade, Holly Houdeshell, Ola Kvalvaag, Dillon Nall, Ethan Sanders, Alec Vest, Shaun Westlund, Matthew Hardison, Clinton R. Paden, Duncan MacCannell                                                                                                                                                                                                                                                                                                                                                                                                                                                                                                                                                                                                              |
| hCoV-19/USA/AK-PHL8777/2021          | EPI_ISL_2187646 | 5/6/2021  | Alaska State Virology Laboratory  | Alaska State Virology Laboratory                                                             | Stephanie DeRonde, Elva House, Jacob Zidek, Lisa Smith, Ph.D., Jack Chen, Ph.D.                                                                                                                                                                                                                                                                                                                                                                                                                                                                                                                                                                                                                                                                                                                                                                                                                                                                                                                                                                |
| hCoV-19/USA/AK-PHL8778/2021          | EPI_ISL_2187647 | 5/6/2021  | Alaska State Virology Laboratory  | Alaska State Virology Laboratory                                                             | Stephanie DeRonde, Elva House, Jacob Zidek, Lisa Smith, Ph.D., Jack Chen, Ph.D.                                                                                                                                                                                                                                                                                                                                                                                                                                                                                                                                                                                                                                                                                                                                                                                                                                                                                                                                                                |
| hCoV-19/USA/AK-PHL8779/2021          | EPI_ISL_2187648 | 5/11/2021 | Alaska State Virology Laboratory  | Alaska State Virology Laboratory                                                             | Stephanie DeRonde, Elva House, Jacob Zidek, Lisa Smith, Ph.D., Jack Chen, Ph.D.                                                                                                                                                                                                                                                                                                                                                                                                                                                                                                                                                                                                                                                                                                                                                                                                                                                                                                                                                                |
| hCoV-19/USA/AK-PHL8780/2021          | EPI_ISL_2187649 | 5/10/2021 | Alaska State Virology Laboratory  | Alaska State Virology Laboratory                                                             | Stephanie DeRonde, Elva House, Jacob Zidek, Lisa Smith, Ph.D., Jack Chen, Ph.D.                                                                                                                                                                                                                                                                                                                                                                                                                                                                                                                                                                                                                                                                                                                                                                                                                                                                                                                                                                |
| hCoV-19/USA/AK-PHL8781/2021          | EPI_ISL_2187650 | 5/11/2021 | Alaska State Virology Laboratory  | Alaska State Virology Laboratory                                                             | Stephanie DeRonde, Elva House, Jacob Zidek, Lisa Smith, Ph.D., Jack Chen, Ph.D.                                                                                                                                                                                                                                                                                                                                                                                                                                                                                                                                                                                                                                                                                                                                                                                                                                                                                                                                                                |
| hCoV-19/USA/AK-PHL8782/2021          | EPI_ISL_2187651 | 5/11/2021 | Alaska State Virology Laboratory  | Alaska State Virology Laboratory                                                             | Stephanie DeRonde, Elva House, Jacob Zidek, Lisa Smith, Ph.D., Jack Chen, Ph.D.                                                                                                                                                                                                                                                                                                                                                                                                                                                                                                                                                                                                                                                                                                                                                                                                                                                                                                                                                                |
| hCoV-19/USA/AK-PHL8783/2021          | EPI_ISL_2187652 | 5/11/2021 | Alaska State Virology Laboratory  | Alaska State Virology Laboratory                                                             | Stephanie DeRonde, Elva House, Jacob Zidek, Lisa Smith, Ph.D., Jack Chen, Ph.D.                                                                                                                                                                                                                                                                                                                                                                                                                                                                                                                                                                                                                                                                                                                                                                                                                                                                                                                                                                |
| hCoV-19/USA/AK-PHL8784/2021          | EPI_ISL_2187653 | 5/11/2021 | Alaska State Virology Laboratory  | Alaska State Virology Laboratory                                                             | Stephanie DeRonde, Elva House, Jacob Zidek, Lisa Smith, Ph.D., Jack Chen, Ph.D.                                                                                                                                                                                                                                                                                                                                                                                                                                                                                                                                                                                                                                                                                                                                                                                                                                                                                                                                                                |
| hCoV-19/USA/AK-PHL8785/2021          | EPI_ISL_2187654 | 5/9/2021  | Alaska State Virology Laboratory  | Alaska State Virology Laboratory                                                             | Stephanie DeRonde, Elva House, Jacob Zidek, Lisa Smith, Ph.D., Jack Chen, Ph.D.                                                                                                                                                                                                                                                                                                                                                                                                                                                                                                                                                                                                                                                                                                                                                                                                                                                                                                                                                                |
| hCoV-19/USA/AK-PHL8786/2021          | EPI_ISL_2187655 | 5/10/2021 | Alaska State Virology Laboratory  | Alaska State Virology Laboratory                                                             | Stephanie DeRonde, Elva House, Jacob Zidek, Lisa Smith, Ph.D., Jack Chen, Ph.D.                                                                                                                                                                                                                                                                                                                                                                                                                                                                                                                                                                                                                                                                                                                                                                                                                                                                                                                                                                |
| hCoV-19/USA/AK-PHL8788/2021          | EPI_ISL_2187657 | 5/10/2021 | Alaska State Virology Laboratory  | Alaska State Virology Laboratory                                                             | Stephanie DeRonde, Elva House, Jacob Zidek, Lisa Smith, Ph.D., Jack Chen, Ph.D.                                                                                                                                                                                                                                                                                                                                                                                                                                                                                                                                                                                                                                                                                                                                                                                                                                                                                                                                                                |
| hCoV-19/USA/AK-PHL8789/2021          | EPI_ISL_2187658 | 5/10/2021 | Alaska State Virology Laboratory  | Alaska State Virology Laboratory                                                             | Stephanie DeRonde, Elva House, Jacob Zidek, Lisa Smith, Ph.D., Jack Chen, Ph.D.                                                                                                                                                                                                                                                                                                                                                                                                                                                                                                                                                                                                                                                                                                                                                                                                                                                                                                                                                                |
| hCoV-19/USA/AK-PHL8790/2021          | EPI_ISL_2187659 | 5/5/2021  | Alaska State Virology Laboratory  | Alaska State Virology Laboratory                                                             | Stephanie DeRonde, Elva House, Jacob Zidek, Lisa Smith, Ph.D., Jack Chen, Ph.D.                                                                                                                                                                                                                                                                                                                                                                                                                                                                                                                                                                                                                                                                                                                                                                                                                                                                                                                                                                |
| hCoV-19/USA/AK-PHL8791/2021          | EPI_ISL_2187660 | 5/4/2021  | Alaska State Virology Laboratory  | Alaska State Virology Laboratory                                                             | Stephanie DeRonde, Elva House, Jacob Zidek, Lisa Smith, Ph.D., Jack Chen, Ph.D.                                                                                                                                                                                                                                                                                                                                                                                                                                                                                                                                                                                                                                                                                                                                                                                                                                                                                                                                                                |
| hCoV-19/USA/AK-PHL8792/2021          | EPI_ISL_2187661 | 5/4/2021  | Alaska State Virology Laboratory  | Alaska State Virology Laboratory                                                             | Stephanie DeRonde, Elva House, Jacob Zidek, Lisa Smith, Ph.D., Jack Chen, Ph.D.                                                                                                                                                                                                                                                                                                                                                                                                                                                                                                                                                                                                                                                                                                                                                                                                                                                                                                                                                                |
| hCoV-19/USA/AK-PHL8793/2021          | EPI_ISL_2187662 | 5/4/2021  | Alaska State Virology Laboratory  | Alaska State Virology Laboratory                                                             | Stephanie DeRonde, Elva House, Jacob Zidek, Lisa Smith, Ph.D., Jack Chen, Ph.D.                                                                                                                                                                                                                                                                                                                                                                                                                                                                                                                                                                                                                                                                                                                                                                                                                                                                                                                                                                |
| hCoV-19/USA/AK-PHL8794/2021          | EPI_ISL_2187663 | 5/4/2021  | Alaska State Virology Laboratory  | Alaska State Virology Laboratory                                                             | Stephanie DeRonde, Elva House, Jacob Zidek, Lisa Smith, Ph.D., Jack Chen, Ph.D.                                                                                                                                                                                                                                                                                                                                                                                                                                                                                                                                                                                                                                                                                                                                                                                                                                                                                                                                                                |
| hCoV-19/USA/AK-PHL8796/2021          | EPI_ISL_2187664 | 5/5/2021  | Alaska State Virology Laboratory  | Alaska State Virology Laboratory                                                             | Stephanie DeRonde, Elva House, Jacob Zidek, Lisa Smith, Ph.D., Jack Chen, Ph.D.                                                                                                                                                                                                                                                                                                                                                                                                                                                                                                                                                                                                                                                                                                                                                                                                                                                                                                                                                                |



|                                   |                 |           |                                                     |                                                                                              |                                                                                                                                                                                                                                                                                                                                                                   |
|-----------------------------------|-----------------|-----------|-----------------------------------------------------|----------------------------------------------------------------------------------------------|-------------------------------------------------------------------------------------------------------------------------------------------------------------------------------------------------------------------------------------------------------------------------------------------------------------------------------------------------------------------|
| hCoV-19/USA/AK-PHL8679/2021       | EPI_ISL_2213228 | 5/5/2021  | Alaska State Virology Laboratory                    | Alaska State Virology Laboratory                                                             | Stephanie DeRonde, Elva House, Jacob Zidek, Lisa Smith, Ph.D., Jack Chen, Ph.D.                                                                                                                                                                                                                                                                                   |
| hCoV-19/USA/AK-PHL8680/2021       | EPI_ISL_2213231 | 5/5/2021  | Alaska State Virology Laboratory                    | Alaska State Virology Laboratory                                                             | Stephanie DeRonde, Elva House, Jacob Zidek, Lisa Smith, Ph.D., Jack Chen, Ph.D.                                                                                                                                                                                                                                                                                   |
| hCoV-19/USA/AK-PHL8681/2021       | EPI_ISL_2213232 | 5/5/2021  | Alaska State Virology Laboratory                    | Alaska State Virology Laboratory                                                             | Stephanie DeRonde, Elva House, Jacob Zidek, Lisa Smith, Ph.D., Jack Chen, Ph.D.                                                                                                                                                                                                                                                                                   |
| hCoV-19/USA/AK-PHL8682/2021       | EPI_ISL_2213235 | 5/5/2021  | Alaska State Virology Laboratory                    | Alaska State Virology Laboratory                                                             | Stephanie DeRonde, Elva House, Jacob Zidek, Lisa Smith, Ph.D., Jack Chen, Ph.D.                                                                                                                                                                                                                                                                                   |
| hCoV-19/USA/AK-PHL7919/2021       | EPI_ISL_2227457 | 4/3/2021  | Alaska State Virology Laboratory                    | Alaska State Virology Laboratory                                                             | Stephanie DeRonde, Elva House, Lisa Smith, Ph.D., Jack Chen, Ph.D.                                                                                                                                                                                                                                                                                                |
| hCoV-19/USA/AK-PHL7923/2021       | EPI_ISL_2227459 | 4/3/2021  | Alaska State Virology Laboratory                    | Alaska State Virology Laboratory                                                             | Stephanie DeRonde, Elva House, Lisa Smith, Ph.D., Jack Chen, Ph.D.                                                                                                                                                                                                                                                                                                |
| hCoV-19/USA/AK-PHL8649/2021       | EPI_ISL_2227462 | 5/5/2021  | Alaska State Virology Laboratory                    | Alaska State Virology Laboratory                                                             | Stephanie DeRonde, Elva House, Jacob Zidek, Lisa Smith, Ph.D., Jack Chen, Ph.D.                                                                                                                                                                                                                                                                                   |
| hCoV-19/USA/AK-PHL8661/2021       | EPI_ISL_2227463 | 5/4/2021  | Alaska State Virology Laboratory                    | Alaska State Virology Laboratory                                                             | Stephanie DeRonde, Elva House, Jacob Zidek, Lisa Smith, Ph.D., Jack Chen, Ph.D.                                                                                                                                                                                                                                                                                   |
| hCoV-19/USA/AK-CDC-2-4356403/2021 | EPI_ISL_2229014 | 5/1/2021  | AK State Public Health Lab, State Health Department | Centers for Disease Control and Prevention<br>Division of Viral Diseases, Pathogen Discovery | Milli Sheth, Sarah Nobles, Jasmine Padilla, Mark Burroughs, Shoshona Le, Katie Dillon, Peter Cook, Clinton R. Paden, Dhvani Batra, Krista Queen, Kristen Knipe, Dakota Howard, Yvette Unoarumhi, Darlene Wagner, Matthew Schmerer, Ben L. Rambo-Martin, Kristine Lacek, Sam Shepard, Alison Laufer Halpin, Dave Wentworth, Vivien Dugan, Suxiang Tong, Justin Lee |
| hCoV-19/USA/AK-CDC-2-4356404/2021 | EPI_ISL_2229017 | 4/26/2021 | AK State Public Health Lab, State Health Department | Centers for Disease Control and Prevention<br>Division of Viral Diseases, Pathogen Discovery | Milli Sheth, Sarah Nobles, Jasmine Padilla, Mark Burroughs, Shoshona Le, Katie Dillon, Peter Cook, Clinton R. Paden, Dhvani Batra, Krista Queen, Kristen Knipe, Dakota Howard, Yvette Unoarumhi, Darlene Wagner, Matthew Schmerer, Ben L. Rambo-Martin, Kristine Lacek, Sam Shepard, Alison Laufer Halpin, Dave Wentworth, Vivien Dugan, Suxiang Tong, Justin Lee |
| hCoV-19/USA/AK-CDC-2-4356434/2021 | EPI_ISL_2229020 | 5/3/2021  | AK State Public Health Lab, State Health Department | Centers for Disease Control and Prevention<br>Division of Viral Diseases, Pathogen Discovery | Milli Sheth, Sarah Nobles, Jasmine Padilla, Mark Burroughs, Shoshona Le, Katie Dillon, Peter Cook, Clinton R. Paden, Dhvani Batra, Krista Queen, Kristen Knipe, Dakota Howard, Yvette Unoarumhi, Darlene Wagner, Matthew Schmerer, Ben L. Rambo-Martin, Kristine Lacek, Sam Shepard, Alison Laufer Halpin, Dave Wentworth, Vivien Dugan, Suxiang Tong, Justin Lee |
| hCoV-19/USA/AK-CDC-2-4356446/2021 | EPI_ISL_2229022 | 5/5/2021  | AK State Public Health Lab, State Health Department | Centers for Disease Control and Prevention<br>Division of Viral Diseases, Pathogen Discovery | Milli Sheth, Sarah Nobles, Jasmine Padilla, Mark Burroughs, Shoshona Le, Katie Dillon, Peter Cook, Clinton R. Paden, Dhvani Batra, Krista Queen, Kristen Knipe, Dakota Howard, Yvette Unoarumhi, Darlene Wagner, Matthew Schmerer, Ben L. Rambo-Martin, Kristine Lacek, Sam Shepard, Alison Laufer Halpin, Dave Wentworth, Vivien Dugan, Suxiang Tong, Justin Lee |
| hCoV-19/USA/AK-CDC-2-4356511/2021 | EPI_ISL_2229025 | 5/3/2021  | AK State Public Health Lab, State Health Department | Centers for Disease Control and Prevention<br>Division of Viral Diseases, Pathogen Discovery | Milli Sheth, Sarah Nobles, Jasmine Padilla, Mark Burroughs, Shoshona Le, Katie Dillon, Peter Cook, Clinton R. Paden, Dhvani Batra, Krista Queen, Kristen Knipe, Dakota Howard, Yvette Unoarumhi, Darlene Wagner, Matthew Schmerer, Ben L. Rambo-Martin, Kristine Lacek, Sam Shepard, Alison Laufer Halpin, Dave Wentworth, Vivien Dugan, Suxiang Tong, Justin Lee |
| hCoV-19/USA/AK-CDC-2-4356422/2021 | EPI_ISL_2229027 | 4/26/2021 | AK State Public Health Lab, State Health Department | Centers for Disease Control and Prevention<br>Division of Viral Diseases, Pathogen Discovery | Milli Sheth, Sarah Nobles, Jasmine Padilla, Mark Burroughs, Shoshona Le, Katie Dillon, Peter Cook, Clinton R. Paden, Dhvani Batra, Krista Queen, Kristen Knipe, Dakota Howard, Yvette Unoarumhi, Darlene Wagner, Matthew Schmerer, Ben L. Rambo-Martin, Kristine Lacek, Sam Shepard, Alison Laufer Halpin, Dave Wentworth, Vivien Dugan, Suxiang Tong, Justin Lee |
| hCoV-19/USA/AK-CDC-2-4356530/2021 | EPI_ISL_2229030 | 4/26/2021 | AK State Public Health Lab, State Health Department | Centers for Disease Control and Prevention<br>Division of Viral Diseases, Pathogen Discovery | Milli Sheth, Sarah Nobles, Jasmine Padilla, Mark Burroughs, Shoshona Le, Katie Dillon, Peter Cook, Clinton R. Paden, Dhvani Batra, Krista Queen, Kristen Knipe, Dakota Howard, Yvette Unoarumhi, Darlene Wagner, Matthew Schmerer, Ben L. Rambo-Martin, Kristine Lacek, Sam Shepard, Alison Laufer Halpin, Dave Wentworth, Vivien Dugan, Suxiang Tong, Justin Lee |
| hCoV-19/USA/AK-CDC-2-4356522/2021 | EPI_ISL_2229032 | 4/27/2021 | AK State Public Health Lab, State Health Department | Centers for Disease Control and Prevention<br>Division of Viral Diseases, Pathogen Discovery | Milli Sheth, Sarah Nobles, Jasmine Padilla, Mark Burroughs, Shoshona Le, Katie Dillon, Peter Cook, Clinton R. Paden, Dhvani Batra, Krista Queen, Kristen Knipe, Dakota Howard, Yvette Unoarumhi, Darlene Wagner, Matthew Schmerer, Ben L. Rambo-Martin, Kristine Lacek, Sam Shepard, Alison Laufer Halpin, Dave Wentworth, Vivien Dugan, Suxiang Tong, Justin Lee |
| hCoV-19/USA/AK-CDC-2-4356414/2021 | EPI_ISL_2229034 | 5/3/2021  | AK State Public Health Lab, State Health Department | Centers for Disease Control and Prevention<br>Division of Viral Diseases, Pathogen Discovery | Milli Sheth, Sarah Nobles, Jasmine Padilla, Mark Burroughs, Shoshona Le, Katie Dillon, Peter Cook, Clinton R. Paden, Dhvani Batra, Krista Queen, Kristen Knipe, Dakota Howard, Yvette Unoarumhi, Darlene Wagner, Matthew Schmerer, Ben L. Rambo-Martin, Kristine Lacek, Sam Shepard, Alison Laufer Halpin, Dave Wentworth, Vivien Dugan, Suxiang Tong, Justin Lee |

|                                       |                 |           |                                                     |                                                                                              |                                                                                                                                                                                                                                                                                                                                                                                                                                                                                                                                                                                                                                                                                                                         |
|---------------------------------------|-----------------|-----------|-----------------------------------------------------|----------------------------------------------------------------------------------------------|-------------------------------------------------------------------------------------------------------------------------------------------------------------------------------------------------------------------------------------------------------------------------------------------------------------------------------------------------------------------------------------------------------------------------------------------------------------------------------------------------------------------------------------------------------------------------------------------------------------------------------------------------------------------------------------------------------------------------|
| hCoV-19/USA/AK-CDC-2-4356544/2021     | EPI_ISL_2229036 | 5/4/2021  | AK State Public Health Lab, State Health Department | Centers for Disease Control and Prevention<br>Division of Viral Diseases, Pathogen Discovery | Mili Sheth, Sarah Nobles, Jasmine Padilla, Mark Burroughs, Shoshona Le, Katie Dillon, Peter Cook, Clinton R. Paden, Dhvani Batra, Krista Queen, Kristen Knipe, Dakota Howard, Yvette Unoarumhi, Darlene Wagner, Matthew Schmerer, Ben L. Rambo-Martin, Kristine Lacek, Sam Shepard, Alison Laufer Halpin, Dave Wentworth, Vivien Dugan, Suxiang Tong, Justin Lee                                                                                                                                                                                                                                                                                                                                                        |
| hCoV-19/USA/AK-CDC-2-4356433/2021     | EPI_ISL_2229039 | 4/26/2021 | AK State Public Health Lab, State Health Department | Centers for Disease Control and Prevention<br>Division of Viral Diseases, Pathogen Discovery | Mili Sheth, Sarah Nobles, Jasmine Padilla, Mark Burroughs, Shoshona Le, Katie Dillon, Peter Cook, Clinton R. Paden, Dhvani Batra, Krista Queen, Kristen Knipe, Dakota Howard, Yvette Unoarumhi, Darlene Wagner, Matthew Schmerer, Ben L. Rambo-Martin, Kristine Lacek, Sam Shepard, Alison Laufer Halpin, Dave Wentworth, Vivien Dugan, Suxiang Tong, Justin Lee                                                                                                                                                                                                                                                                                                                                                        |
| hCoV-19/USA/AK-CDC-2-4356443/2021     | EPI_ISL_2229042 | 5/4/2021  | AK State Public Health Lab, State Health Department | Centers for Disease Control and Prevention<br>Division of Viral Diseases, Pathogen Discovery | Mili Sheth, Sarah Nobles, Jasmine Padilla, Mark Burroughs, Shoshona Le, Katie Dillon, Peter Cook, Clinton R. Paden, Dhvani Batra, Krista Queen, Kristen Knipe, Dakota Howard, Yvette Unoarumhi, Darlene Wagner, Matthew Schmerer, Ben L. Rambo-Martin, Kristine Lacek, Sam Shepard, Alison Laufer Halpin, Dave Wentworth, Vivien Dugan, Suxiang Tong, Justin Lee                                                                                                                                                                                                                                                                                                                                                        |
| hCoV-19/USA/AK-CDC-2-4356501/2021     | EPI_ISL_2229047 | 5/3/2021  | AK State Public Health Lab, State Health Department | Centers for Disease Control and Prevention<br>Division of Viral Diseases, Pathogen Discovery | Mili Sheth, Sarah Nobles, Jasmine Padilla, Mark Burroughs, Shoshona Le, Katie Dillon, Peter Cook, Clinton R. Paden, Dhvani Batra, Krista Queen, Kristen Knipe, Dakota Howard, Yvette Unoarumhi, Darlene Wagner, Matthew Schmerer, Ben L. Rambo-Martin, Kristine Lacek, Sam Shepard, Alison Laufer Halpin, Dave Wentworth, Vivien Dugan, Suxiang Tong, Justin Lee                                                                                                                                                                                                                                                                                                                                                        |
| hCoV-19/USA/AK-CDC-2-4356523/2021     | EPI_ISL_2229050 | 4/26/2021 | AK State Public Health Lab, State Health Department | Centers for Disease Control and Prevention<br>Division of Viral Diseases, Pathogen Discovery | Mili Sheth, Sarah Nobles, Jasmine Padilla, Mark Burroughs, Shoshona Le, Katie Dillon, Peter Cook, Clinton R. Paden, Dhvani Batra, Krista Queen, Kristen Knipe, Dakota Howard, Yvette Unoarumhi, Darlene Wagner, Matthew Schmerer, Ben L. Rambo-Martin, Kristine Lacek, Sam Shepard, Alison Laufer Halpin, Dave Wentworth, Vivien Dugan, Suxiang Tong, Justin Lee                                                                                                                                                                                                                                                                                                                                                        |
| hCoV-19/USA/AK-CDC-2-4356449/2021     | EPI_ISL_2229052 | 5/3/2021  | AK State Public Health Lab, State Health Department | Centers for Disease Control and Prevention<br>Division of Viral Diseases, Pathogen Discovery | Mili Sheth, Sarah Nobles, Jasmine Padilla, Mark Burroughs, Shoshona Le, Katie Dillon, Peter Cook, Clinton R. Paden, Dhvani Batra, Krista Queen, Kristen Knipe, Dakota Howard, Yvette Unoarumhi, Darlene Wagner, Matthew Schmerer, Ben L. Rambo-Martin, Kristine Lacek, Sam Shepard, Alison Laufer Halpin, Dave Wentworth, Vivien Dugan, Suxiang Tong, Justin Lee                                                                                                                                                                                                                                                                                                                                                        |
| hCoV-19/USA/AK-CDC-2-4356425/2021     | EPI_ISL_2229054 | 4/27/2021 | AK State Public Health Lab, State Health Department | Centers for Disease Control and Prevention<br>Division of Viral Diseases, Pathogen Discovery | Mili Sheth, Sarah Nobles, Jasmine Padilla, Mark Burroughs, Shoshona Le, Katie Dillon, Peter Cook, Clinton R. Paden, Dhvani Batra, Krista Queen, Kristen Knipe, Dakota Howard, Yvette Unoarumhi, Darlene Wagner, Matthew Schmerer, Ben L. Rambo-Martin, Kristine Lacek, Sam Shepard, Alison Laufer Halpin, Dave Wentworth, Vivien Dugan, Suxiang Tong, Justin Lee                                                                                                                                                                                                                                                                                                                                                        |
| hCoV-19/USA/AK-PHL7917/2021           | EPI_ISL_2230701 | 4/3/2021  | Alaska State Virology Laboratory                    | Alaska State Virology Laboratory                                                             | Stephanie DeRonde, Elva House, Lisa Smith, Ph.D., Jack Chen, Ph.D.                                                                                                                                                                                                                                                                                                                                                                                                                                                                                                                                                                                                                                                      |
| hCoV-19/USA/AK-PHL7792/2021           | EPI_ISL_2230703 | 3/26/2021 | Alaska State Virology Laboratory                    | Alaska State Virology Laboratory                                                             | Stephanie DeRonde, Elva House, Lisa Smith, Ph.D., Jack Chen, Ph.D.                                                                                                                                                                                                                                                                                                                                                                                                                                                                                                                                                                                                                                                      |
| hCoV-19/USA/AK-PHL7804/2021           | EPI_ISL_2230704 | 3/29/2021 | Alaska State Virology Laboratory                    | Alaska State Virology Laboratory                                                             | Stephanie DeRonde, Elva House, Lisa Smith, Ph.D., Jack Chen, Ph.D.                                                                                                                                                                                                                                                                                                                                                                                                                                                                                                                                                                                                                                                      |
| hCoV-19/USA/AK-PHL7764/2021           | EPI_ISL_2230705 | 3/26/2021 | Alaska State Virology Laboratory                    | Alaska State Virology Laboratory                                                             | Stephanie DeRonde, Elva House, Lisa Smith, Ph.D., Jack Chen, Ph.D.                                                                                                                                                                                                                                                                                                                                                                                                                                                                                                                                                                                                                                                      |
| hCoV-19/USA/AK-CDC-ASC210073437/2021  | EPI_ISL_2268080 | 4/15/2021 | Aegis Sciences Corporation                          | Centers for Disease Control and Prevention<br>Division of Viral Diseases, Pathogen Discovery | Dakota Howard, Dhvani Batra, Peter W. Cook, Kara Moser, Adrian Paskey, Jason Caravas, Benjamin Rambo-Martin, Shatavia Morrison, Christopher Gulvick, Scott Sammons, Yvette Unoarumhi, Darlene Wagner, Matthew Schmerer, Cyndi Clark, Patrick Campbell, Rob Case, Vikramsinha Ghorpade, Holly Houdeshell, Ola Kvalvaag, Dillon Nall, Ethan Sanders, Alec Vest, Shaun Westlund, Matthew Hardison, Clinton R. Paden, Duncan MacCannell                                                                                                                                                                                                                                                                                     |
| hCoV-19/USA/AK-CDC-STM-000070167/2021 | EPI_ISL_2270401 | 5/6/2021  | Helix/Illumina                                      | Centers for Disease Control and Prevention<br>Division of Viral Diseases, Pathogen Discovery | Dakota Howard, Dhvani Batra, Peter W. Cook, Kara Moser, Adrian Paskey, Jason Caravas, Benjamin Rambo-Martin, Shatavia Morrison, Christopher Gulvick, Scott Sammons, Yvette Unoarumhi, Darlene Wagner, Matthew Schmerer, Eileen de Feo, Jan Antico, Christine Tran, Matthew Tolentino, Shannon Wickline, Kim Gietzen, Brad Sickler, Jingtao Liu, Eric Allen, Phil Febbo, Nicole L. Washington, Simon White, Geraint Levan, Kelly Schiabor Barrett, Elizabeth Cirulli, Alexandre Bolze, Ary Ascencio, Charlotte Rivera-Garcia, Ryan Cho, Jason Nguyen, Sherry Wang, Jimmy Ramirez, Tyler Cassens, Efrén Sandoval, Magnus Isaksson, William Lee, David Becker, Marc Laurent, James Lu, Clinton R. Paden, Duncan MacCannell |
| hCoV-19/USA/AK-PHL8823/2021           | EPI_ISL_2272522 | 5/14/2021 | Alaska State Virology Laboratory                    | Alaska State Virology Laboratory                                                             | Stephanie DeRonde, Elva House, Jacob Zidek, Lisa Smith, Ph.D., Jack Chen, Ph.D.                                                                                                                                                                                                                                                                                                                                                                                                                                                                                                                                                                                                                                         |











|                                      |                 |           |                                   |                                                                                              |                                                                                                                                                                                                                                                                                                                                                                                                                                                                                                                                                                                                                                                                                                                                                                                                                                                                                                                                                                                                                                                 |
|--------------------------------------|-----------------|-----------|-----------------------------------|----------------------------------------------------------------------------------------------|-------------------------------------------------------------------------------------------------------------------------------------------------------------------------------------------------------------------------------------------------------------------------------------------------------------------------------------------------------------------------------------------------------------------------------------------------------------------------------------------------------------------------------------------------------------------------------------------------------------------------------------------------------------------------------------------------------------------------------------------------------------------------------------------------------------------------------------------------------------------------------------------------------------------------------------------------------------------------------------------------------------------------------------------------|
| hCoV-19/USA/AK-PHL8654/2021          | EPI_ISL_2626749 | 6/13/2021 | Alaska State Virology Laboratory  | Alaska State Virology Laboratory                                                             | Stephanie DeRonde, Elva House, Jacob Zidek, Lisa Smith, Ph.D., Jack Chen, Ph.D.                                                                                                                                                                                                                                                                                                                                                                                                                                                                                                                                                                                                                                                                                                                                                                                                                                                                                                                                                                 |
| hCoV-19/USA/AK-PHL9661/2021          | EPI_ISL_2626755 | 6/13/2021 | Alaska State Virology Laboratory  | Alaska State Virology Laboratory                                                             | Stephanie DeRonde, Elva House, Jacob Zidek, Lisa Smith, Ph.D., Jack Chen, Ph.D.                                                                                                                                                                                                                                                                                                                                                                                                                                                                                                                                                                                                                                                                                                                                                                                                                                                                                                                                                                 |
| hCoV-19/USA/AK-CDC-ASC210034741/2021 | EPI_ISL_2042495 | 4/26/2021 | Aegis Sciences Corporation        | Centers for Disease Control and Prevention<br>Division of Viral Diseases, Pathogen Discovery | Dakota Howard, Dhvani Batra, Peter W. Cook, Kara Moser, Adrian Paskey, Jason Caravas, Benjamin Rambo-Martin, Shatavia Morrison, Christopher Gulvick, Scott Sammons, Yvette Unoarumhi, Darlene Wagner, Matthew Schmeier, Cyndi Clark, Patrick Campbell, Rob Case, Vikramsinha Ghorpade, Holly Houdeshell, Ola Kvalvaag, Dillon Nall, Ethan Sanders, Alec Vest, Shaun Westlund, Matthew Hardison, Clinton R. Paden, Duncan MacCannell                                                                                                                                                                                                                                                                                                                                                                                                                                                                                                                                                                                                             |
| hCoV-19/USA/AK-PHL8646/2021          | EPI_ISL_2213169 | 5/4/2021  | Alaska State Virology Laboratory  | Alaska State Virology Laboratory                                                             | Stephanie DeRonde, Elva House, Jacob Zidek, Lisa Smith, Ph.D., Jack Chen, Ph.D.                                                                                                                                                                                                                                                                                                                                                                                                                                                                                                                                                                                                                                                                                                                                                                                                                                                                                                                                                                 |
| hCoV-19/USA/AK-PHL8646/2021          | EPI_ISL_2213201 | 4/22/2021 | Alaska State Virology Laboratory  | Alaska State Virology Laboratory                                                             | Stephanie DeRonde, Elva House, Jacob Zidek, Lisa Smith, Ph.D., Jack Chen, Ph.D.                                                                                                                                                                                                                                                                                                                                                                                                                                                                                                                                                                                                                                                                                                                                                                                                                                                                                                                                                                 |
| hCoV-19/USA/AK-CDC-LC0056155/2021    | EPI_ISL_2046452 | 4/17/2021 | Laboratory Corporation of America | Centers for Disease Control and Prevention<br>Division of Viral Diseases, Pathogen Discovery | Dakota Howard, Dhvani Batra, Peter W. Cook, Kara Moser, Adrian Paskey, Jason Caravas, Benjamin Rambo-Martin, Shatavia Morrison, Christopher Gulvick, Scott Sammons, Yvette Unoarumhi, Darlene Wagner, Matthew Schmeier, Mino Agarwal, Eyad Almasri, Debbie Boles, Ayla Burns, Nuthawin Charoensri, Oren Cohen, Susan Countryman, Mary Ann Cristobal, Bobbi Croy, Suzanne Dale, Hrushikesh Deshmukh, Amanda Douglas, Vincent Drouillon, Marcia Eisenberg, Howard Engler, Rama Ghatti, Prashant Gupta, Susan Hicks, Jake Humphrey, Lax Iyer, Manoj Jain, Mohan Kolli, Brian Krueger, Tim Kuphal, Stanley Letovsky, Michael Levandoski, Craig Lukasik, Jonathan Meltzer, Brian Norvell, Mindy Nye, Scott Parker, Christos Petropoulos, John Pruitt, Steven Ragan, Scott Ryan, Mike Sapeta, Jana Schroth, Suresh Babu Selvaraju, Goran Stevovic, Amanda Suchanek, Andrea Throop, Lyndon Tilson, Thomas Urban, Joe Voshell, Kimberly Wagner, Jonathan Williams, Mary Williamson, Qian Zeng, Tricia Zwiefelhofer, Clinton R. Paden, Duncan MacCannell |
| hCoV-19/USA/AK-PHL8442/2021          | EPI_ISL_2429085 | 4/26/2021 | Alaska State Virology Laboratory  | Alaska State Virology Laboratory                                                             | Stephanie DeRonde, Elva House, Jacob Zidek, Lisa Smith, Ph.D., Jack Chen, Ph.D.                                                                                                                                                                                                                                                                                                                                                                                                                                                                                                                                                                                                                                                                                                                                                                                                                                                                                                                                                                 |
| hCoV-19/USA/AK-PHL8445/2021          | EPI_ISL_2429088 | 4/26/2021 | Alaska State Virology Laboratory  | Alaska State Virology Laboratory                                                             | Stephanie DeRonde, Elva House, Jacob Zidek, Lisa Smith, Ph.D., Jack Chen, Ph.D.                                                                                                                                                                                                                                                                                                                                                                                                                                                                                                                                                                                                                                                                                                                                                                                                                                                                                                                                                                 |
| hCoV-19/USA/AK-PHL8446/2021          | EPI_ISL_2429089 | 4/26/2021 | Alaska State Virology Laboratory  | Alaska State Virology Laboratory                                                             | Stephanie DeRonde, Elva House, Jacob Zidek, Lisa Smith, Ph.D., Jack Chen, Ph.D.                                                                                                                                                                                                                                                                                                                                                                                                                                                                                                                                                                                                                                                                                                                                                                                                                                                                                                                                                                 |
| hCoV-19/USA/AK-PHL8452/2021          | EPI_ISL_2429095 | 4/27/2021 | Alaska State Virology Laboratory  | Alaska State Virology Laboratory                                                             | Stephanie DeRonde, Elva House, Jacob Zidek, Lisa Smith, Ph.D., Jack Chen, Ph.D.                                                                                                                                                                                                                                                                                                                                                                                                                                                                                                                                                                                                                                                                                                                                                                                                                                                                                                                                                                 |
| hCoV-19/USA/AK-PHL8461/2021          | EPI_ISL_2429104 | 4/26/2021 | Alaska State Virology Laboratory  | Alaska State Virology Laboratory                                                             | Stephanie DeRonde, Elva House, Jacob Zidek, Lisa Smith, Ph.D., Jack Chen, Ph.D.                                                                                                                                                                                                                                                                                                                                                                                                                                                                                                                                                                                                                                                                                                                                                                                                                                                                                                                                                                 |
| hCoV-19/USA/AK-PHL8462/2021          | EPI_ISL_2429105 | 4/26/2021 | Alaska State Virology Laboratory  | Alaska State Virology Laboratory                                                             | Stephanie DeRonde, Elva House, Jacob Zidek, Lisa Smith, Ph.D., Jack Chen, Ph.D.                                                                                                                                                                                                                                                                                                                                                                                                                                                                                                                                                                                                                                                                                                                                                                                                                                                                                                                                                                 |
| hCoV-19/USA/AK-PHL8465/2021          | EPI_ISL_2429108 | 4/18/2021 | Alaska State Virology Laboratory  | Alaska State Virology Laboratory                                                             | Stephanie DeRonde, Elva House, Jacob Zidek, Lisa Smith, Ph.D., Jack Chen, Ph.D.                                                                                                                                                                                                                                                                                                                                                                                                                                                                                                                                                                                                                                                                                                                                                                                                                                                                                                                                                                 |
| hCoV-19/USA/AK-PHL8468/2021          | EPI_ISL_2429111 | 4/22/2021 | Alaska State Virology Laboratory  | Alaska State Virology Laboratory                                                             | Stephanie DeRonde, Elva House, Jacob Zidek, Lisa Smith, Ph.D., Jack Chen, Ph.D.                                                                                                                                                                                                                                                                                                                                                                                                                                                                                                                                                                                                                                                                                                                                                                                                                                                                                                                                                                 |
| hCoV-19/USA/AK-PHL8471/2021          | EPI_ISL_2429114 | 4/18/2021 | Alaska State Virology Laboratory  | Alaska State Virology Laboratory                                                             | Stephanie DeRonde, Elva House, Jacob Zidek, Lisa Smith, Ph.D., Jack Chen, Ph.D.                                                                                                                                                                                                                                                                                                                                                                                                                                                                                                                                                                                                                                                                                                                                                                                                                                                                                                                                                                 |
| hCoV-19/USA/AK-PHL8472/2021          | EPI_ISL_2429115 | 4/19/2021 | Alaska State Virology Laboratory  | Alaska State Virology Laboratory                                                             | Stephanie DeRonde, Elva House, Jacob Zidek, Lisa Smith, Ph.D., Jack Chen, Ph.D.                                                                                                                                                                                                                                                                                                                                                                                                                                                                                                                                                                                                                                                                                                                                                                                                                                                                                                                                                                 |
| hCoV-19/USA/AK-PHL8474/2021          | EPI_ISL_2429117 | 4/22/2021 | Alaska State Virology Laboratory  | Alaska State Virology Laboratory                                                             | Stephanie DeRonde, Elva House, Jacob Zidek, Lisa Smith, Ph.D., Jack Chen, Ph.D.                                                                                                                                                                                                                                                                                                                                                                                                                                                                                                                                                                                                                                                                                                                                                                                                                                                                                                                                                                 |
| hCoV-19/USA/AK-PHL8685/2021          | EPI_ISL_2136431 | 5/6/2021  | Alaska State Virology Laboratory  | Alaska State Virology Laboratory                                                             | Stephanie DeRonde, Elva House, Jacob Zidek, Lisa Smith, Ph.D., Jack Chen, Ph.D.                                                                                                                                                                                                                                                                                                                                                                                                                                                                                                                                                                                                                                                                                                                                                                                                                                                                                                                                                                 |
| hCoV-19/USA/AK-PHL8686/2021          | EPI_ISL_2136432 | 5/6/2021  | Alaska State Virology Laboratory  | Alaska State Virology Laboratory                                                             | Stephanie DeRonde, Elva House, Jacob Zidek, Lisa Smith, Ph.D., Jack Chen, Ph.D.                                                                                                                                                                                                                                                                                                                                                                                                                                                                                                                                                                                                                                                                                                                                                                                                                                                                                                                                                                 |
| hCoV-19/USA/AK-PHL8687/2021          | EPI_ISL_2136433 | 5/6/2021  | Alaska State Virology Laboratory  | Alaska State Virology Laboratory                                                             | Stephanie DeRonde, Elva House, Jacob Zidek, Lisa Smith, Ph.D., Jack Chen, Ph.D.                                                                                                                                                                                                                                                                                                                                                                                                                                                                                                                                                                                                                                                                                                                                                                                                                                                                                                                                                                 |
| hCoV-19/USA/AK-PHL8692/2021          | EPI_ISL_2136437 | 5/6/2021  | Alaska State Virology Laboratory  | Alaska State Virology Laboratory                                                             | Stephanie DeRonde, Elva House, Jacob Zidek, Lisa Smith, Ph.D., Jack Chen, Ph.D.                                                                                                                                                                                                                                                                                                                                                                                                                                                                                                                                                                                                                                                                                                                                                                                                                                                                                                                                                                 |
| hCoV-19/USA/AK-PHL8696/2021          | EPI_ISL_2136441 | 5/6/2021  | Alaska State Virology Laboratory  | Alaska State Virology Laboratory                                                             | Stephanie DeRonde, Elva House, Jacob Zidek, Lisa Smith, Ph.D., Jack Chen, Ph.D.                                                                                                                                                                                                                                                                                                                                                                                                                                                                                                                                                                                                                                                                                                                                                                                                                                                                                                                                                                 |
| hCoV-19/USA/AK-PHL8693/2021          | EPI_ISL_2136438 | 5/6/2021  | Alaska State Virology Laboratory  | Alaska State Virology Laboratory                                                             | Stephanie DeRonde, Elva House, Jacob Zidek, Lisa Smith, Ph.D., Jack Chen, Ph.D.                                                                                                                                                                                                                                                                                                                                                                                                                                                                                                                                                                                                                                                                                                                                                                                                                                                                                                                                                                 |
| hCoV-19/USA/AK-PHL8694/2021          | EPI_ISL_2136439 | 5/6/2021  | Alaska State Virology Laboratory  | Alaska State Virology Laboratory                                                             | Stephanie DeRonde, Elva House, Jacob Zidek, Lisa Smith, Ph.D., Jack Chen, Ph.D.                                                                                                                                                                                                                                                                                                                                                                                                                                                                                                                                                                                                                                                                                                                                                                                                                                                                                                                                                                 |
| hCoV-19/USA/AK-PHL8702/2021          | EPI_ISL_2136445 | 5/7/2021  | Alaska State Virology Laboratory  | Alaska State Virology Laboratory                                                             | Stephanie DeRonde, Elva House, Jacob Zidek, Lisa Smith, Ph.D., Jack Chen, Ph.D.                                                                                                                                                                                                                                                                                                                                                                                                                                                                                                                                                                                                                                                                                                                                                                                                                                                                                                                                                                 |
| hCoV-19/USA/AK-PHL8724/2021          | EPI_ISL_2136465 | 5/4/2021  | Alaska State Virology Laboratory  | Alaska State Virology Laboratory                                                             | Stephanie DeRonde, Elva House, Jacob Zidek, Lisa Smith, Ph.D., Jack Chen, Ph.D.                                                                                                                                                                                                                                                                                                                                                                                                                                                                                                                                                                                                                                                                                                                                                                                                                                                                                                                                                                 |
| hCoV-19/USA/AK-PHL8705/2021          | EPI_ISL_2136447 | 5/8/2021  | Alaska State Virology Laboratory  | Alaska State Virology Laboratory                                                             | Stephanie DeRonde, Elva House, Jacob Zidek, Lisa Smith, Ph.D., Jack Chen, Ph.D.                                                                                                                                                                                                                                                                                                                                                                                                                                                                                                                                                                                                                                                                                                                                                                                                                                                                                                                                                                 |
| hCoV-19/USA/AK-PHL8710/2021          | EPI_ISL_2136452 | 5/5/2021  | Alaska State Virology Laboratory  | Alaska State Virology Laboratory                                                             | Stephanie DeRonde, Elva House, Jacob Zidek, Lisa Smith, Ph.D., Jack Chen, Ph.D.                                                                                                                                                                                                                                                                                                                                                                                                                                                                                                                                                                                                                                                                                                                                                                                                                                                                                                                                                                 |
| hCoV-19/USA/AK-PHL8720/2021          | EPI_ISL_2136461 | 5/4/2021  | Alaska State Virology Laboratory  | Alaska State Virology Laboratory                                                             | Stephanie DeRonde, Elva House, Jacob Zidek, Lisa Smith, Ph.D., Jack Chen, Ph.D.                                                                                                                                                                                                                                                                                                                                                                                                                                                                                                                                                                                                                                                                                                                                                                                                                                                                                                                                                                 |
| hCoV-19/USA/AK-PHL8722/2021          | EPI_ISL_2136463 | 5/5/2021  | Alaska State Virology Laboratory  | Alaska State Virology Laboratory                                                             | Stephanie DeRonde, Elva House, Jacob Zidek, Lisa Smith, Ph.D., Jack Chen, Ph.D.                                                                                                                                                                                                                                                                                                                                                                                                                                                                                                                                                                                                                                                                                                                                                                                                                                                                                                                                                                 |
| hCoV-19/USA/AK-PHL8574/2021          | EPI_ISL_2136747 | 5/1/2021  | Alaska State Virology Laboratory  | Alaska State Virology Laboratory                                                             | Stephanie DeRonde, Elva House, Jacob Zidek, Lisa Smith, Ph.D., Jack Chen, Ph.D.                                                                                                                                                                                                                                                                                                                                                                                                                                                                                                                                                                                                                                                                                                                                                                                                                                                                                                                                                                 |
| hCoV-19/USA/AK-PHL8590/2021          | EPI_ISL_2136762 | 5/3/2021  | Alaska State Virology Laboratory  | Alaska State Virology Laboratory                                                             | Stephanie DeRonde, Elva House, Jacob Zidek, Lisa Smith, Ph.D., Jack Chen, Ph.D.                                                                                                                                                                                                                                                                                                                                                                                                                                                                                                                                                                                                                                                                                                                                                                                                                                                                                                                                                                 |
| hCoV-19/USA/AK-PHL8591/2021          | EPI_ISL_2136763 | 5/3/2021  | Alaska State Virology Laboratory  | Alaska State Virology Laboratory                                                             | Stephanie DeRonde, Elva House, Jacob Zidek, Lisa Smith, Ph.D., Jack Chen, Ph.D.                                                                                                                                                                                                                                                                                                                                                                                                                                                                                                                                                                                                                                                                                                                                                                                                                                                                                                                                                                 |
| hCoV-19/USA/AK-PHL8592/2021          | EPI_ISL_2136764 | 5/3/2021  | Alaska State Virology Laboratory  | Alaska State Virology Laboratory                                                             | Stephanie DeRonde, Elva House, Jacob Zidek, Lisa Smith, Ph.D., Jack Chen, Ph.D.                                                                                                                                                                                                                                                                                                                                                                                                                                                                                                                                                                                                                                                                                                                                                                                                                                                                                                                                                                 |
| hCoV-19/USA/AK-PHL8594/2021          | EPI_ISL_2136766 | 5/3/2021  | Alaska State Virology Laboratory  | Alaska State Virology Laboratory                                                             | Stephanie DeRonde, Elva House, Jacob Zidek, Lisa Smith, Ph.D., Jack Chen, Ph.D.                                                                                                                                                                                                                                                                                                                                                                                                                                                                                                                                                                                                                                                                                                                                                                                                                                                                                                                                                                 |





|                                      |                 |            |                                                     |                                                                                              |                                                                                                                                                                                                                                                                                                                                                                                                                                    |
|--------------------------------------|-----------------|------------|-----------------------------------------------------|----------------------------------------------------------------------------------------------|------------------------------------------------------------------------------------------------------------------------------------------------------------------------------------------------------------------------------------------------------------------------------------------------------------------------------------------------------------------------------------------------------------------------------------|
| hCoV-19/USA/AK-PHL6685/2020          | EPI_ISL_2716845 | 12/23/2020 | Alaska State Virology Laboratory                    | Alaska State Virology Laboratory                                                             | Stephanie DeRonde, Elva House, Jacob Zidek, Lisa Smith, Ph.D., Jack Chen, Ph.D.                                                                                                                                                                                                                                                                                                                                                    |
| hCoV-19/USA/AK-PHL6686/2021          | EPI_ISL_2716846 | 1/4/2021   | Alaska State Virology Laboratory                    | Alaska State Virology Laboratory                                                             | Stephanie DeRonde, Elva House, Jacob Zidek, Lisa Smith, Ph.D., Jack Chen, Ph.D.                                                                                                                                                                                                                                                                                                                                                    |
| hCoV-19/USA/AK-PHL6687/2020          | EPI_ISL_2716847 | 12/29/2020 | Alaska State Virology Laboratory                    | Alaska State Virology Laboratory                                                             | Stephanie DeRonde, Elva House, Jacob Zidek, Lisa Smith, Ph.D., Jack Chen, Ph.D.                                                                                                                                                                                                                                                                                                                                                    |
| hCoV-19/USA/AK-PHL6688/2021          | EPI_ISL_2716848 | 1/6/2021   | Alaska State Virology Laboratory                    | Alaska State Virology Laboratory                                                             | Stephanie DeRonde, Elva House, Jacob Zidek, Lisa Smith, Ph.D., Jack Chen, Ph.D.                                                                                                                                                                                                                                                                                                                                                    |
| hCoV-19/USA/AK-PHL6689/2020          | EPI_ISL_2716849 | 12/26/2020 | Alaska State Virology Laboratory                    | Alaska State Virology Laboratory                                                             | Stephanie DeRonde, Elva House, Jacob Zidek, Lisa Smith, Ph.D., Jack Chen, Ph.D.                                                                                                                                                                                                                                                                                                                                                    |
| hCoV-19/USA/AK-PHL6690/2021          | EPI_ISL_2716850 | 1/5/2021   | Alaska State Virology Laboratory                    | Alaska State Virology Laboratory                                                             | Stephanie DeRonde, Elva House, Jacob Zidek, Lisa Smith, Ph.D., Jack Chen, Ph.D.                                                                                                                                                                                                                                                                                                                                                    |
| hCoV-19/USA/AK-PHL6691/2021          | EPI_ISL_2716851 | 1/7/2021   | Alaska State Virology Laboratory                    | Alaska State Virology Laboratory                                                             | Stephanie DeRonde, Elva House, Jacob Zidek, Lisa Smith, Ph.D., Jack Chen, Ph.D.                                                                                                                                                                                                                                                                                                                                                    |
| hCoV-19/USA/AK-PHL6693/2021          | EPI_ISL_2716852 | 1/11/2021  | Alaska State Virology Laboratory                    | Alaska State Virology Laboratory                                                             | Stephanie DeRonde, Elva House, Jacob Zidek, Lisa Smith, Ph.D., Jack Chen, Ph.D.                                                                                                                                                                                                                                                                                                                                                    |
| hCoV-19/USA/AK-PHL6694/2021          | EPI_ISL_2716853 | 1/6/2021   | Alaska State Virology Laboratory                    | Alaska State Virology Laboratory                                                             | Stephanie DeRonde, Elva House, Jacob Zidek, Lisa Smith, Ph.D., Jack Chen, Ph.D.                                                                                                                                                                                                                                                                                                                                                    |
| hCoV-19/USA/AK-PHL6695/2021          | EPI_ISL_2716854 | 1/11/2021  | Alaska State Virology Laboratory                    | Alaska State Virology Laboratory                                                             | Stephanie DeRonde, Elva House, Jacob Zidek, Lisa Smith, Ph.D., Jack Chen, Ph.D.                                                                                                                                                                                                                                                                                                                                                    |
| hCoV-19/USA/AK-PHL6696/2021          | EPI_ISL_2716855 | 1/11/2021  | Alaska State Virology Laboratory                    | Alaska State Virology Laboratory                                                             | Stephanie DeRonde, Elva House, Jacob Zidek, Lisa Smith, Ph.D., Jack Chen, Ph.D.                                                                                                                                                                                                                                                                                                                                                    |
| hCoV-19/USA/AK-PHL6697/2021          | EPI_ISL_2716856 | 1/4/2021   | Alaska State Virology Laboratory                    | Alaska State Virology Laboratory                                                             | Stephanie DeRonde, Elva House, Jacob Zidek, Lisa Smith, Ph.D., Jack Chen, Ph.D.                                                                                                                                                                                                                                                                                                                                                    |
| hCoV-19/USA/AK-PHL6698/2021          | EPI_ISL_2716857 | 1/5/2021   | Alaska State Virology Laboratory                    | Alaska State Virology Laboratory                                                             | Stephanie DeRonde, Elva House, Jacob Zidek, Lisa Smith, Ph.D., Jack Chen, Ph.D.                                                                                                                                                                                                                                                                                                                                                    |
| hCoV-19/USA/AK-PHL6700/2021          | EPI_ISL_2716858 | 1/5/2021   | Alaska State Virology Laboratory                    | Alaska State Virology Laboratory                                                             | Stephanie DeRonde, Elva House, Jacob Zidek, Lisa Smith, Ph.D., Jack Chen, Ph.D.                                                                                                                                                                                                                                                                                                                                                    |
| hCoV-19/USA/AK-PHL6701/2021          | EPI_ISL_2716859 | 1/8/2021   | Alaska State Virology Laboratory                    | Alaska State Virology Laboratory                                                             | Stephanie DeRonde, Elva House, Jacob Zidek, Lisa Smith, Ph.D., Jack Chen, Ph.D.                                                                                                                                                                                                                                                                                                                                                    |
| hCoV-19/USA/AK-PHL6702/2021          | EPI_ISL_2716860 | 1/6/2021   | Alaska State Virology Laboratory                    | Alaska State Virology Laboratory                                                             | Stephanie DeRonde, Elva House, Jacob Zidek, Lisa Smith, Ph.D., Jack Chen, Ph.D.                                                                                                                                                                                                                                                                                                                                                    |
| hCoV-19/USA/AK-PHL6703/2021          | EPI_ISL_2716861 | 1/6/2021   | Alaska State Virology Laboratory                    | Alaska State Virology Laboratory                                                             | Stephanie DeRonde, Elva House, Jacob Zidek, Lisa Smith, Ph.D., Jack Chen, Ph.D.                                                                                                                                                                                                                                                                                                                                                    |
| hCoV-19/USA/AK-PHL6704/2021          | EPI_ISL_2716862 | 1/8/2021   | Alaska State Virology Laboratory                    | Alaska State Virology Laboratory                                                             | Stephanie DeRonde, Elva House, Jacob Zidek, Lisa Smith, Ph.D., Jack Chen, Ph.D.                                                                                                                                                                                                                                                                                                                                                    |
| hCoV-19/USA/AK-PHL6706/2021          | EPI_ISL_2716863 | 1/8/2021   | Alaska State Virology Laboratory                    | Alaska State Virology Laboratory                                                             | Stephanie DeRonde, Elva House, Jacob Zidek, Lisa Smith, Ph.D., Jack Chen, Ph.D.                                                                                                                                                                                                                                                                                                                                                    |
| hCoV-19/USA/AK-PHL6707/2021          | EPI_ISL_2716864 | 1/7/2021   | Alaska State Virology Laboratory                    | Alaska State Virology Laboratory                                                             | Stephanie DeRonde, Elva House, Jacob Zidek, Lisa Smith, Ph.D., Jack Chen, Ph.D.                                                                                                                                                                                                                                                                                                                                                    |
| hCoV-19/USA/AK-PHL6708/2021          | EPI_ISL_2716865 | 1/5/2021   | Alaska State Virology Laboratory                    | Alaska State Virology Laboratory                                                             | Stephanie DeRonde, Elva House, Jacob Zidek, Lisa Smith, Ph.D., Jack Chen, Ph.D.                                                                                                                                                                                                                                                                                                                                                    |
| hCoV-19/USA/AK-PHL6710/2020          | EPI_ISL_2716867 | 12/7/2020  | Alaska State Virology Laboratory                    | Alaska State Virology Laboratory                                                             | Stephanie DeRonde, Elva House, Jacob Zidek, Lisa Smith, Ph.D., Jack Chen, Ph.D.                                                                                                                                                                                                                                                                                                                                                    |
| hCoV-19/USA/AK-PHL6712/2020          | EPI_ISL_2716868 | 12/7/2020  | Alaska State Virology Laboratory                    | Alaska State Virology Laboratory                                                             | Stephanie DeRonde, Elva House, Jacob Zidek, Lisa Smith, Ph.D., Jack Chen, Ph.D.                                                                                                                                                                                                                                                                                                                                                    |
| hCoV-19/USA/AK-PHL6713/2020          | EPI_ISL_2716869 | 12/6/2020  | Alaska State Virology Laboratory                    | Alaska State Virology Laboratory                                                             | Stephanie DeRonde, Elva House, Jacob Zidek, Lisa Smith, Ph.D., Jack Chen, Ph.D.                                                                                                                                                                                                                                                                                                                                                    |
| hCoV-19/USA/AK-CDC-ASC210110528/2021 | EPI_ISL_2785037 | 6/21/2021  | Aegis Sciences Corporation                          | Centers for Disease Control and Prevention<br>Division of Viral Diseases, Pathogen Discovery | Dakota Howard, Dhvani Batra, Peter W. Cook, Kara Moser, Adrian Paskey, Jason Caravas, Benjamin Rambo-Martin, Shatavia Morrison, Christopher Gulvick, Scott Sammons, Yvette Unoarumhi, Darlene Wagner, Matthew Schmeier, Cyndi Clark, Patrick Campbell, Rob Case, Vikramsinh Ghorpade, Holly Houdeshell, Ola Kvalvaag, Dillon Nall, Ethan Sanders, Alec Vest, Shaun Westlund, Matthew Harrison, Clinton R. Paden, Duncan MacCannell |
| hCoV-19/USA/AK-CDC-FG-038624/2021    | EPI_ISL_2785924 | 6/24/2021  | Fulgent Genetics                                    | Centers for Disease Control and Prevention<br>Division of Viral Diseases, Pathogen Discovery | Dakota Howard, Dhvani Batra, Peter W. Cook, Kara Moser, Adrian Paskey, Jason Caravas, Benjamin Rambo-Martin, Shatavia Morrison, Christopher Gulvick, Scott Sammons, Yvette Unoarumhi, Darlene Wagner, Matthew Schmeier, Harry Gao, Mickey Li, John Gao, Joseph Fierro, Benafsh Sapra, Becky Tsai, Yan Meng, Doreen Ng, James Xie, Clinton R. Paden, Duncan MacCannell                                                              |
| hCoV-19/USA/AK-CDC-2-4523885/2021    | EPI_ISL_2787511 | 5/18/2021  | AK State Public Health Lab, State Health Department | Centers for Disease Control and Prevention<br>Division of Viral Diseases, Pathogen Discovery | Milli Sheth, Sarah Nobles, Jasmine Padilla, Mark Burroughs, Shoshona Le, Katie Dillon, Peter Cook, Clinton R. Paden, Dhvani Batra, Krista Queen, Kristen Knipe, Dakota Howard, Yvette Unoarumhi, Darlene Wagner, Matthew Schmeier, Ben L. Rambo-Martin, Kristine Lacek, Sam Shepard, Alison Laufer Halpin, Dave Wentworth, Vivien Dugan, Suxiang Tong, Justin Lee                                                                  |
| hCoV-19/USA/AK-PHL9662/2021          | EPI_ISL_2790762 | 6/15/2021  | Alaska State Virology Laboratory                    | Alaska State Virology Laboratory                                                             | Stephanie DeRonde, Elva House, Jacob Zidek, Lisa Smith, Ph.D., Jack Chen, Ph.D.                                                                                                                                                                                                                                                                                                                                                    |
| hCoV-19/USA/AK-PHL9663/2021          | EPI_ISL_2790763 | 6/19/2021  | Alaska State Virology Laboratory                    | Alaska State Virology Laboratory                                                             | Stephanie DeRonde, Elva House, Jacob Zidek, Lisa Smith, Ph.D., Jack Chen, Ph.D.                                                                                                                                                                                                                                                                                                                                                    |
| hCoV-19/USA/AK-PHL9664/2021          | EPI_ISL_2790764 | 6/19/2021  | Alaska State Virology Laboratory                    | Alaska State Virology Laboratory                                                             | Stephanie DeRonde, Elva House, Jacob Zidek, Lisa Smith, Ph.D., Jack Chen, Ph.D.                                                                                                                                                                                                                                                                                                                                                    |
| hCoV-19/USA/AK-PHL9665/2021          | EPI_ISL_2790765 | 6/19/2021  | Alaska State Virology Laboratory                    | Alaska State Virology Laboratory                                                             | Stephanie DeRonde, Elva House, Jacob Zidek, Lisa Smith, Ph.D., Jack Chen, Ph.D.                                                                                                                                                                                                                                                                                                                                                    |
| hCoV-19/USA/AK-PHL9666/2021          | EPI_ISL_2790766 | 6/18/2021  | Alaska State Virology Laboratory                    | Alaska State Virology Laboratory                                                             | Stephanie DeRonde, Elva House, Jacob Zidek, Lisa Smith, Ph.D., Jack Chen, Ph.D.                                                                                                                                                                                                                                                                                                                                                    |
| hCoV-19/USA/AK-PHL9667/2021          | EPI_ISL_2790767 | 6/18/2021  | Alaska State Virology Laboratory                    | Alaska State Virology Laboratory                                                             | Stephanie DeRonde, Elva House, Jacob Zidek, Lisa Smith, Ph.D., Jack Chen, Ph.D.                                                                                                                                                                                                                                                                                                                                                    |
| hCoV-19/USA/AK-PHL9668/2021          | EPI_ISL_2790768 | 6/17/2021  | Alaska State Virology Laboratory                    | Alaska State Virology Laboratory                                                             | Stephanie DeRonde, Elva House, Jacob Zidek, Lisa Smith, Ph.D., Jack Chen, Ph.D.                                                                                                                                                                                                                                                                                                                                                    |
| hCoV-19/USA/AK-PHL9669/2021          | EPI_ISL_2790769 | 6/18/2021  | Alaska State Virology Laboratory                    | Alaska State Virology Laboratory                                                             | Stephanie DeRonde, Elva House, Jacob Zidek, Lisa Smith, Ph.D., Jack Chen, Ph.D.                                                                                                                                                                                                                                                                                                                                                    |
| hCoV-19/USA/AK-PHL9670/2021          | EPI_ISL_2790770 | 6/18/2021  | Alaska State Virology Laboratory                    | Alaska State Virology Laboratory                                                             | Stephanie DeRonde, Elva House, Jacob Zidek, Lisa Smith, Ph.D., Jack Chen, Ph.D.                                                                                                                                                                                                                                                                                                                                                    |
| hCoV-19/USA/AK-PHL9671/2021          | EPI_ISL_2790771 | 6/18/2021  | Alaska State Virology Laboratory                    | Alaska State Virology Laboratory                                                             | Stephanie DeRonde, Elva House, Jacob Zidek, Lisa Smith, Ph.D., Jack Chen, Ph.D.                                                                                                                                                                                                                                                                                                                                                    |
| hCoV-19/USA/AK-PHL9673/2021          | EPI_ISL_2790772 | 6/17/2021  | Alaska State Virology Laboratory                    | Alaska State Virology Laboratory                                                             | Stephanie DeRonde, Elva House, Jacob Zidek, Lisa Smith, Ph.D., Jack Chen, Ph.D.                                                                                                                                                                                                                                                                                                                                                    |
| hCoV-19/USA/AK-PHL9675/2021          | EPI_ISL_2790773 | 6/16/2021  | Alaska State Virology Laboratory                    | Alaska State Virology Laboratory                                                             | Stephanie DeRonde, Elva House, Jacob Zidek, Lisa Smith, Ph.D., Jack Chen, Ph.D.                                                                                                                                                                                                                                                                                                                                                    |







|                                   |                 |           |                                   |                                                                                              |                                                                                                                                                                                                                                                                                                                                                                                                                                                                                                                                                                                                                                                                                                                                                                                                                                                                                                                                                                                                                                                                                  |
|-----------------------------------|-----------------|-----------|-----------------------------------|----------------------------------------------------------------------------------------------|----------------------------------------------------------------------------------------------------------------------------------------------------------------------------------------------------------------------------------------------------------------------------------------------------------------------------------------------------------------------------------------------------------------------------------------------------------------------------------------------------------------------------------------------------------------------------------------------------------------------------------------------------------------------------------------------------------------------------------------------------------------------------------------------------------------------------------------------------------------------------------------------------------------------------------------------------------------------------------------------------------------------------------------------------------------------------------|
| hCoV-19/USA/AK-PHL9949/2021       | EPI_ISL_2987157 | 6/21/2021 | Alaska State Virology Laboratory  | Alaska State Virology Laboratory                                                             | Stephanie DeRonde, Elva House, Jacob Zidek, Lisa Smith, Ph.D., Jack Chen, Ph.D.                                                                                                                                                                                                                                                                                                                                                                                                                                                                                                                                                                                                                                                                                                                                                                                                                                                                                                                                                                                                  |
| hCoV-19/USA/AK-PHL9950/2021       | EPI_ISL_2987158 | 6/21/2021 | Alaska State Virology Laboratory  | Alaska State Virology Laboratory                                                             | Stephanie DeRonde, Elva House, Jacob Zidek, Lisa Smith, Ph.D., Jack Chen, Ph.D.                                                                                                                                                                                                                                                                                                                                                                                                                                                                                                                                                                                                                                                                                                                                                                                                                                                                                                                                                                                                  |
| hCoV-19/USA/AK-PHL9974/2021       | EPI_ISL_2987160 | 6/21/2021 | Alaska State Virology Laboratory  | Alaska State Virology Laboratory                                                             | Stephanie DeRonde, Elva House, Jacob Zidek, Lisa Smith, Ph.D., Jack Chen, Ph.D.                                                                                                                                                                                                                                                                                                                                                                                                                                                                                                                                                                                                                                                                                                                                                                                                                                                                                                                                                                                                  |
| hCoV-19/USA/AK-PHL9931/2021       | EPI_ISL_2987161 | 6/25/2021 | Alaska State Virology Laboratory  | Alaska State Virology Laboratory                                                             | Stephanie DeRonde, Elva House, Jacob Zidek, Lisa Smith, Ph.D., Jack Chen, Ph.D.                                                                                                                                                                                                                                                                                                                                                                                                                                                                                                                                                                                                                                                                                                                                                                                                                                                                                                                                                                                                  |
| hCoV-19/USA/AK-PHL9971/2021       | EPI_ISL_2987163 | 6/25/2021 | Alaska State Virology Laboratory  | Alaska State Virology Laboratory                                                             | Stephanie DeRonde, Elva House, Jacob Zidek, Lisa Smith, Ph.D., Jack Chen, Ph.D.                                                                                                                                                                                                                                                                                                                                                                                                                                                                                                                                                                                                                                                                                                                                                                                                                                                                                                                                                                                                  |
| hCoV-19/USA/AK-PHL9964/2021       | EPI_ISL_2987166 | 4/27/2021 | Alaska State Virology Laboratory  | Alaska State Virology Laboratory                                                             | Stephanie DeRonde, Elva House, Jacob Zidek, Lisa Smith, Ph.D., Jack Chen, Ph.D.                                                                                                                                                                                                                                                                                                                                                                                                                                                                                                                                                                                                                                                                                                                                                                                                                                                                                                                                                                                                  |
| hCoV-19/USA/AK-PHL9956/2021       | EPI_ISL_2987175 | 4/26/2021 | Alaska State Virology Laboratory  | Alaska State Virology Laboratory                                                             | Stephanie DeRonde, Elva House, Jacob Zidek, Lisa Smith, Ph.D., Jack Chen, Ph.D.                                                                                                                                                                                                                                                                                                                                                                                                                                                                                                                                                                                                                                                                                                                                                                                                                                                                                                                                                                                                  |
| hCoV-19/USA/AK-PHL9957/2021       | EPI_ISL_2987176 | 4/26/2021 | Alaska State Virology Laboratory  | Alaska State Virology Laboratory                                                             | Stephanie DeRonde, Elva House, Jacob Zidek, Lisa Smith, Ph.D., Jack Chen, Ph.D.                                                                                                                                                                                                                                                                                                                                                                                                                                                                                                                                                                                                                                                                                                                                                                                                                                                                                                                                                                                                  |
| hCoV-19/USA/AK-PHL9958/2021       | EPI_ISL_2987177 | 4/27/2021 | Alaska State Virology Laboratory  | Alaska State Virology Laboratory                                                             | Stephanie DeRonde, Elva House, Jacob Zidek, Lisa Smith, Ph.D., Jack Chen, Ph.D.                                                                                                                                                                                                                                                                                                                                                                                                                                                                                                                                                                                                                                                                                                                                                                                                                                                                                                                                                                                                  |
| hCoV-19/USA/AK-PHL9959/2021       | EPI_ISL_2987178 | 4/26/2021 | Alaska State Virology Laboratory  | Alaska State Virology Laboratory                                                             | Stephanie DeRonde, Elva House, Jacob Zidek, Lisa Smith, Ph.D., Jack Chen, Ph.D.                                                                                                                                                                                                                                                                                                                                                                                                                                                                                                                                                                                                                                                                                                                                                                                                                                                                                                                                                                                                  |
| hCoV-19/USA/AK-PHL9960/2021       | EPI_ISL_2987179 | 4/27/2021 | Alaska State Virology Laboratory  | Alaska State Virology Laboratory                                                             | Stephanie DeRonde, Elva House, Jacob Zidek, Lisa Smith, Ph.D., Jack Chen, Ph.D.                                                                                                                                                                                                                                                                                                                                                                                                                                                                                                                                                                                                                                                                                                                                                                                                                                                                                                                                                                                                  |
| hCoV-19/USA/AK-PHL9961/2021       | EPI_ISL_2987180 | 4/27/2021 | Alaska State Virology Laboratory  | Alaska State Virology Laboratory                                                             | Stephanie DeRonde, Elva House, Jacob Zidek, Lisa Smith, Ph.D., Jack Chen, Ph.D.                                                                                                                                                                                                                                                                                                                                                                                                                                                                                                                                                                                                                                                                                                                                                                                                                                                                                                                                                                                                  |
| hCoV-19/USA/AK-PHL9962/2021       | EPI_ISL_2987181 | 4/27/2021 | Alaska State Virology Laboratory  | Alaska State Virology Laboratory                                                             | Stephanie DeRonde, Elva House, Jacob Zidek, Lisa Smith, Ph.D., Jack Chen, Ph.D.                                                                                                                                                                                                                                                                                                                                                                                                                                                                                                                                                                                                                                                                                                                                                                                                                                                                                                                                                                                                  |
| hCoV-19/USA/AK-PHL9963/2021       | EPI_ISL_2987182 | 4/27/2021 | Alaska State Virology Laboratory  | Alaska State Virology Laboratory                                                             | Stephanie DeRonde, Elva House, Jacob Zidek, Lisa Smith, Ph.D., Jack Chen, Ph.D.                                                                                                                                                                                                                                                                                                                                                                                                                                                                                                                                                                                                                                                                                                                                                                                                                                                                                                                                                                                                  |
| hCoV-19/USA/AK-PHL10002/2021      | EPI_ISL_2987183 | 4/24/2021 | Alaska State Virology Laboratory  | Alaska State Virology Laboratory                                                             | Stephanie DeRonde, Elva House, Jacob Zidek, Lisa Smith, Ph.D., Jack Chen, Ph.D.                                                                                                                                                                                                                                                                                                                                                                                                                                                                                                                                                                                                                                                                                                                                                                                                                                                                                                                                                                                                  |
| hCoV-19/USA/AK-PHL10003/2021      | EPI_ISL_2987184 | 4/24/2021 | Alaska State Virology Laboratory  | Alaska State Virology Laboratory                                                             | Stephanie DeRonde, Elva House, Jacob Zidek, Lisa Smith, Ph.D., Jack Chen, Ph.D.                                                                                                                                                                                                                                                                                                                                                                                                                                                                                                                                                                                                                                                                                                                                                                                                                                                                                                                                                                                                  |
| hCoV-19/USA/AK-PHL10004/2021      | EPI_ISL_2987185 | 4/24/2021 | Alaska State Virology Laboratory  | Alaska State Virology Laboratory                                                             | Stephanie DeRonde, Elva House, Jacob Zidek, Lisa Smith, Ph.D., Jack Chen, Ph.D.                                                                                                                                                                                                                                                                                                                                                                                                                                                                                                                                                                                                                                                                                                                                                                                                                                                                                                                                                                                                  |
| hCoV-19/USA/AK-PHL10005/2021      | EPI_ISL_2987186 | 4/24/2021 | Alaska State Virology Laboratory  | Alaska State Virology Laboratory                                                             | Stephanie DeRonde, Elva House, Jacob Zidek, Lisa Smith, Ph.D., Jack Chen, Ph.D.                                                                                                                                                                                                                                                                                                                                                                                                                                                                                                                                                                                                                                                                                                                                                                                                                                                                                                                                                                                                  |
| hCoV-19/USA/AK-PHL10006/2021      | EPI_ISL_2987187 | 4/24/2021 | Alaska State Virology Laboratory  | Alaska State Virology Laboratory                                                             | Stephanie DeRonde, Elva House, Jacob Zidek, Lisa Smith, Ph.D., Jack Chen, Ph.D.                                                                                                                                                                                                                                                                                                                                                                                                                                                                                                                                                                                                                                                                                                                                                                                                                                                                                                                                                                                                  |
| hCoV-19/USA/AK-PHL10007/2021      | EPI_ISL_2987188 | 4/24/2021 | Alaska State Virology Laboratory  | Alaska State Virology Laboratory                                                             | Stephanie DeRonde, Elva House, Jacob Zidek, Lisa Smith, Ph.D., Jack Chen, Ph.D.                                                                                                                                                                                                                                                                                                                                                                                                                                                                                                                                                                                                                                                                                                                                                                                                                                                                                                                                                                                                  |
| hCoV-19/USA/AK-PHL10008/2021      | EPI_ISL_2987189 | 4/23/2021 | Alaska State Virology Laboratory  | Alaska State Virology Laboratory                                                             | Stephanie DeRonde, Elva House, Jacob Zidek, Lisa Smith, Ph.D., Jack Chen, Ph.D.                                                                                                                                                                                                                                                                                                                                                                                                                                                                                                                                                                                                                                                                                                                                                                                                                                                                                                                                                                                                  |
| hCoV-19/USA/AK-PHL10009/2021      | EPI_ISL_2987190 | 4/26/2021 | Alaska State Virology Laboratory  | Alaska State Virology Laboratory                                                             | Stephanie DeRonde, Elva House, Jacob Zidek, Lisa Smith, Ph.D., Jack Chen, Ph.D.                                                                                                                                                                                                                                                                                                                                                                                                                                                                                                                                                                                                                                                                                                                                                                                                                                                                                                                                                                                                  |
| hCoV-19/USA/AK-PHL10010/2021      | EPI_ISL_2987191 | 4/26/2021 | Alaska State Virology Laboratory  | Alaska State Virology Laboratory                                                             | Stephanie DeRonde, Elva House, Jacob Zidek, Lisa Smith, Ph.D., Jack Chen, Ph.D.                                                                                                                                                                                                                                                                                                                                                                                                                                                                                                                                                                                                                                                                                                                                                                                                                                                                                                                                                                                                  |
| hCoV-19/USA/AK-PHL10011/2021      | EPI_ISL_2987192 | 4/27/2021 | Alaska State Virology Laboratory  | Alaska State Virology Laboratory                                                             | Stephanie DeRonde, Elva House, Jacob Zidek, Lisa Smith, Ph.D., Jack Chen, Ph.D.                                                                                                                                                                                                                                                                                                                                                                                                                                                                                                                                                                                                                                                                                                                                                                                                                                                                                                                                                                                                  |
| hCoV-19/USA/AK-CDC-LC0091083/2021 | EPI_ISL_3017837 | 6/15/2021 | Laboratory Corporation of America | Centers for Disease Control and Prevention<br>Division of Viral Diseases, Pathogen Discovery | Dakota Howard, Dhvani Batra, Peter W. Cook, Kara Moser, Adrian Paskey, Jason Caravas, Benjamin Rambo-Martin, Shatavia Morrison, Christopher Gulvick, Scott Sammons, Yvette Unoarumhi, Darlene Wagner, Matthew Schmeer, Mino Agarwal, Eyad Almasri, Debbie Boles, Ayla Burns, Nuthawin Charoensri, Oren Cohen, Susan Countryman, Mary Ann Cristobal, Bobbi Croy, Suzanne Dale, Hrushikesh Deshmukh, Amanda Douglas, Vincent Drouillon, Marcia Eisenberg, Howard Engler, Rama Ghanti, Prashant Gupta, Susan Hicks, Jake Humphrey, Lax Iyer, Lisa Pfefferle, Manoj Jain, Matthew Robinson, Mohan Kolli, Brian Krueger, Tim Kuphal, Stanley Letovsky, Michael Levandoski, Craig Lukasik, Jonathan Meltzer, Brian Norvell, Mindy Nye, Scott Parker, Christos Petropoulos, John Pruitt, Steven Ragan, Scott Ryan, Mike Sapeta, Jana Schroth, Suresh Babu Selvaraju, Goran Stevovic, Amanda Suchanek, Andrea Throop, Lyndon Tilson, Thomas Urban, Joe Voshell, Kimberly Wagner, Jonathan Williams, Mary Williamson, Qian Zeng, Tricia Zwiefelhofer, Clinton R. Paden, Duncan MacCannell |
| hCoV-19/USA/AK-PHL10253/2021      | EPI_ISL_3067572 | 4/24/2021 | Alaska State Virology Laboratory  | Alaska State Virology Laboratory                                                             | Stephanie DeRonde, Elva House, Jacob Zidek, Lisa Smith, Ph.D., Jack Chen, Ph.D.                                                                                                                                                                                                                                                                                                                                                                                                                                                                                                                                                                                                                                                                                                                                                                                                                                                                                                                                                                                                  |
| hCoV-19/USA/AK-PHL10129/2021      | EPI_ISL_3118591 | 4/26/2021 | Alaska State Virology Laboratory  | Alaska State Virology Laboratory                                                             | Stephanie DeRonde, Elva House, Jacob Zidek, Lisa Smith, Ph.D., Jack Chen, Ph.D.                                                                                                                                                                                                                                                                                                                                                                                                                                                                                                                                                                                                                                                                                                                                                                                                                                                                                                                                                                                                  |
| hCoV-19/USA/AK-PHL10130/2021      | EPI_ISL_3118592 | 4/26/2021 | Alaska State Virology Laboratory  | Alaska State Virology Laboratory                                                             | Stephanie DeRonde, Elva House, Jacob Zidek, Lisa Smith, Ph.D., Jack Chen, Ph.D.                                                                                                                                                                                                                                                                                                                                                                                                                                                                                                                                                                                                                                                                                                                                                                                                                                                                                                                                                                                                  |
| hCoV-19/USA/AK-PHL10131/2021      | EPI_ISL_3118593 | 4/26/2021 | Alaska State Virology Laboratory  | Alaska State Virology Laboratory                                                             | Stephanie DeRonde, Elva House, Jacob Zidek, Lisa Smith, Ph.D., Jack Chen, Ph.D.                                                                                                                                                                                                                                                                                                                                                                                                                                                                                                                                                                                                                                                                                                                                                                                                                                                                                                                                                                                                  |
| hCoV-19/USA/AK-PHL10132/2021      | EPI_ISL_3118594 | 4/26/2021 | Alaska State Virology Laboratory  | Alaska State Virology Laboratory                                                             | Stephanie DeRonde, Elva House, Jacob Zidek, Lisa Smith, Ph.D., Jack Chen, Ph.D.                                                                                                                                                                                                                                                                                                                                                                                                                                                                                                                                                                                                                                                                                                                                                                                                                                                                                                                                                                                                  |
| hCoV-19/USA/AK-PHL10133/2021      | EPI_ISL_3118595 | 4/26/2021 | Alaska State Virology Laboratory  | Alaska State Virology Laboratory                                                             | Stephanie DeRonde, Elva House, Jacob Zidek, Lisa Smith, Ph.D., Jack Chen, Ph.D.                                                                                                                                                                                                                                                                                                                                                                                                                                                                                                                                                                                                                                                                                                                                                                                                                                                                                                                                                                                                  |
| hCoV-19/USA/AK-PHL10134/2021      | EPI_ISL_3118596 | 4/26/2021 | Alaska State Virology Laboratory  | Alaska State Virology Laboratory                                                             | Stephanie DeRonde, Elva House, Jacob Zidek, Lisa Smith, Ph.D., Jack Chen, Ph.D.                                                                                                                                                                                                                                                                                                                                                                                                                                                                                                                                                                                                                                                                                                                                                                                                                                                                                                                                                                                                  |
| hCoV-19/USA/AK-PHL10135/2021      | EPI_ISL_3118597 | 4/26/2021 | Alaska State Virology Laboratory  | Alaska State Virology Laboratory                                                             | Stephanie DeRonde, Elva House, Jacob Zidek, Lisa Smith, Ph.D., Jack Chen, Ph.D.                                                                                                                                                                                                                                                                                                                                                                                                                                                                                                                                                                                                                                                                                                                                                                                                                                                                                                                                                                                                  |
| hCoV-19/USA/AK-PHL10136/2021      | EPI_ISL_3118598 | 4/26/2021 | Alaska State Virology Laboratory  | Alaska State Virology Laboratory                                                             | Stephanie DeRonde, Elva House, Jacob Zidek, Lisa Smith, Ph.D., Jack Chen, Ph.D.                                                                                                                                                                                                                                                                                                                                                                                                                                                                                                                                                                                                                                                                                                                                                                                                                                                                                                                                                                                                  |
| hCoV-19/USA/AK-PHL10137/2021      | EPI_ISL_3118599 | 4/26/2021 | Alaska State Virology Laboratory  | Alaska State Virology Laboratory                                                             | Stephanie DeRonde, Elva House, Jacob Zidek, Lisa Smith, Ph.D., Jack Chen, Ph.D.                                                                                                                                                                                                                                                                                                                                                                                                                                                                                                                                                                                                                                                                                                                                                                                                                                                                                                                                                                                                  |
| hCoV-19/USA/AK-PHL10138/2021      | EPI_ISL_3118600 | 4/26/2021 | Alaska State Virology Laboratory  | Alaska State Virology Laboratory                                                             | Stephanie DeRonde, Elva House, Jacob Zidek, Lisa Smith, Ph.D., Jack Chen, Ph.D.                                                                                                                                                                                                                                                                                                                                                                                                                                                                                                                                                                                                                                                                                                                                                                                                                                                                                                                                                                                                  |
| hCoV-19/USA/AK-PHL10139/2021      | EPI_ISL_3118601 | 4/21/2021 | Alaska State Virology Laboratory  | Alaska State Virology Laboratory                                                             | Stephanie DeRonde, Elva House, Jacob Zidek, Lisa Smith, Ph.D., Jack Chen, Ph.D.                                                                                                                                                                                                                                                                                                                                                                                                                                                                                                                                                                                                                                                                                                                                                                                                                                                                                                                                                                                                  |
| hCoV-19/USA/AK-PHL10140/2021      | EPI_ISL_3118602 | 4/26/2021 | Alaska State Virology Laboratory  | Alaska State Virology Laboratory                                                             | Stephanie DeRonde, Elva House, Jacob Zidek, Lisa Smith, Ph.D., Jack Chen, Ph.D.                                                                                                                                                                                                                                                                                                                                                                                                                                                                                                                                                                                                                                                                                                                                                                                                                                                                                                                                                                                                  |
| hCoV-19/USA/AK-PHL10141/2021      | EPI_ISL_3118603 | 4/26/2021 | Alaska State Virology Laboratory  | Alaska State Virology Laboratory                                                             | Stephanie DeRonde, Elva House, Jacob Zidek, Lisa Smith, Ph.D., Jack Chen, Ph.D.                                                                                                                                                                                                                                                                                                                                                                                                                                                                                                                                                                                                                                                                                                                                                                                                                                                                                                                                                                                                  |



|                                   |                 |           |                                                     |                                                                                           |                                                                                                                                                                                                                                                                                                                      |
|-----------------------------------|-----------------|-----------|-----------------------------------------------------|-------------------------------------------------------------------------------------------|----------------------------------------------------------------------------------------------------------------------------------------------------------------------------------------------------------------------------------------------------------------------------------------------------------------------|
| hCoV-19/USA/AK-PHL10142/2021      | EPI_ISL_3118604 | 4/26/2021 | Alaska State Virology Laboratory                    | Alaska State Virology Laboratory                                                          | Stephanie DeRonde, Elva House, Jacob Zidek, Lisa Smith, Ph.D., Jack Chen, Ph.D.                                                                                                                                                                                                                                      |
| hCoV-19/USA/AK-PHL10143/2021      | EPI_ISL_3118605 | 4/26/2021 | Alaska State Virology Laboratory                    | Alaska State Virology Laboratory                                                          | Stephanie DeRonde, Elva House, Jacob Zidek, Lisa Smith, Ph.D., Jack Chen, Ph.D.                                                                                                                                                                                                                                      |
| hCoV-19/USA/AK-PHL10144/2021      | EPI_ISL_3118606 | 4/26/2021 | Alaska State Virology Laboratory                    | Alaska State Virology Laboratory                                                          | Stephanie DeRonde, Elva House, Jacob Zidek, Lisa Smith, Ph.D., Jack Chen, Ph.D.                                                                                                                                                                                                                                      |
| hCoV-19/USA/AK-PHL10145/2021      | EPI_ISL_3118607 | 4/26/2021 | Alaska State Virology Laboratory                    | Alaska State Virology Laboratory                                                          | Stephanie DeRonde, Elva House, Jacob Zidek, Lisa Smith, Ph.D., Jack Chen, Ph.D.                                                                                                                                                                                                                                      |
| hCoV-19/USA/AK-PHL10146/2021      | EPI_ISL_3118608 | 4/26/2021 | Alaska State Virology Laboratory                    | Alaska State Virology Laboratory                                                          | Stephanie DeRonde, Elva House, Jacob Zidek, Lisa Smith, Ph.D., Jack Chen, Ph.D.                                                                                                                                                                                                                                      |
| hCoV-19/USA/AK-PHL10147/2021      | EPI_ISL_3118609 | 4/26/2021 | Alaska State Virology Laboratory                    | Alaska State Virology Laboratory                                                          | Stephanie DeRonde, Elva House, Jacob Zidek, Lisa Smith, Ph.D., Jack Chen, Ph.D.                                                                                                                                                                                                                                      |
| hCoV-19/USA/AK-PHL10148/2021      | EPI_ISL_3118610 | 4/25/2021 | Alaska State Virology Laboratory                    | Alaska State Virology Laboratory                                                          | Stephanie DeRonde, Elva House, Jacob Zidek, Lisa Smith, Ph.D., Jack Chen, Ph.D.                                                                                                                                                                                                                                      |
| hCoV-19/USA/AK-PHL10149/2021      | EPI_ISL_3118611 | 4/26/2021 | Alaska State Virology Laboratory                    | Alaska State Virology Laboratory                                                          | Stephanie DeRonde, Elva House, Jacob Zidek, Lisa Smith, Ph.D., Jack Chen, Ph.D.                                                                                                                                                                                                                                      |
| hCoV-19/USA/AK-PHL10150/2021      | EPI_ISL_3118612 | 4/26/2021 | Alaska State Virology Laboratory                    | Alaska State Virology Laboratory                                                          | Stephanie DeRonde, Elva House, Jacob Zidek, Lisa Smith, Ph.D., Jack Chen, Ph.D.                                                                                                                                                                                                                                      |
| hCoV-19/USA/AK-PHL9927/2021       | EPI_ISL_3118614 | 6/23/2021 | Alaska State Virology Laboratory                    | Alaska State Virology Laboratory                                                          | Stephanie DeRonde, Elva House, Jacob Zidek, Lisa Smith, Ph.D., Jack Chen, Ph.D.                                                                                                                                                                                                                                      |
| hCoV-19/USA/AK-PHL9937/2021       | EPI_ISL_3118615 | 6/21/2021 | Alaska State Virology Laboratory                    | Alaska State Virology Laboratory                                                          | Stephanie DeRonde, Elva House, Jacob Zidek, Lisa Smith, Ph.D., Jack Chen, Ph.D.                                                                                                                                                                                                                                      |
| hCoV-19/USA/AK-PHL9944/2021       | EPI_ISL_3118616 | 6/25/2021 | Alaska State Virology Laboratory                    | Alaska State Virology Laboratory                                                          | Stephanie DeRonde, Elva House, Jacob Zidek, Lisa Smith, Ph.D., Jack Chen, Ph.D.                                                                                                                                                                                                                                      |
| hCoV-19/USA/AK-PHL9947/2021       | EPI_ISL_3118617 | 6/25/2021 | Alaska State Virology Laboratory                    | Alaska State Virology Laboratory                                                          | Stephanie DeRonde, Elva House, Jacob Zidek, Lisa Smith, Ph.D., Jack Chen, Ph.D.                                                                                                                                                                                                                                      |
| hCoV-19/USA/AK-PHL9923/2021       | EPI_ISL_3118619 | 6/23/2021 | Alaska State Virology Laboratory                    | Alaska State Virology Laboratory                                                          | Stephanie DeRonde, Elva House, Jacob Zidek, Lisa Smith, Ph.D., Jack Chen, Ph.D.                                                                                                                                                                                                                                      |
| hCoV-19/USA/AK-PHL9924/2021       | EPI_ISL_3118620 | 6/22/2021 | Alaska State Virology Laboratory                    | Alaska State Virology Laboratory                                                          | Stephanie DeRonde, Elva House, Jacob Zidek, Lisa Smith, Ph.D., Jack Chen, Ph.D.                                                                                                                                                                                                                                      |
| hCoV-19/USA/AK-PHL9925/2021       | EPI_ISL_3118621 | 6/22/2021 | Alaska State Virology Laboratory                    | Alaska State Virology Laboratory                                                          | Stephanie DeRonde, Elva House, Jacob Zidek, Lisa Smith, Ph.D., Jack Chen, Ph.D.                                                                                                                                                                                                                                      |
| hCoV-19/USA/AK-PHL9928/2021       | EPI_ISL_3118622 | 6/25/2021 | Alaska State Virology Laboratory                    | Alaska State Virology Laboratory                                                          | Stephanie DeRonde, Elva House, Jacob Zidek, Lisa Smith, Ph.D., Jack Chen, Ph.D.                                                                                                                                                                                                                                      |
| hCoV-19/USA/AK-PHL9938/2021       | EPI_ISL_3118623 | 6/22/2021 | Alaska State Virology Laboratory                    | Alaska State Virology Laboratory                                                          | Stephanie DeRonde, Elva House, Jacob Zidek, Lisa Smith, Ph.D., Jack Chen, Ph.D.                                                                                                                                                                                                                                      |
| hCoV-19/USA/AK-PHL9940/2021       | EPI_ISL_3118624 | 6/22/2021 | Alaska State Virology Laboratory                    | Alaska State Virology Laboratory                                                          | Stephanie DeRonde, Elva House, Jacob Zidek, Lisa Smith, Ph.D., Jack Chen, Ph.D.                                                                                                                                                                                                                                      |
| hCoV-19/USA/AK-PHL9941/2021       | EPI_ISL_3118625 | 6/22/2021 | Alaska State Virology Laboratory                    | Alaska State Virology Laboratory                                                          | Stephanie DeRonde, Elva House, Jacob Zidek, Lisa Smith, Ph.D., Jack Chen, Ph.D.                                                                                                                                                                                                                                      |
| hCoV-19/USA/AK-PHL9942/2021       | EPI_ISL_3118626 | 6/22/2021 | Alaska State Virology Laboratory                    | Alaska State Virology Laboratory                                                          | Stephanie DeRonde, Elva House, Jacob Zidek, Lisa Smith, Ph.D., Jack Chen, Ph.D.                                                                                                                                                                                                                                      |
| hCoV-19/USA/AK-PHL9965/2021       | EPI_ISL_3118627 | 4/27/2021 | Alaska State Virology Laboratory                    | Alaska State Virology Laboratory                                                          | Stephanie DeRonde, Elva House, Jacob Zidek, Lisa Smith, Ph.D., Jack Chen, Ph.D.                                                                                                                                                                                                                                      |
| hCoV-19/USA/AK-PHL9966/2021       | EPI_ISL_3118628 | 4/27/2021 | Alaska State Virology Laboratory                    | Alaska State Virology Laboratory                                                          | Stephanie DeRonde, Elva House, Jacob Zidek, Lisa Smith, Ph.D., Jack Chen, Ph.D.                                                                                                                                                                                                                                      |
| hCoV-19/USA/AK-PHL9972/2021       | EPI_ISL_3118637 | 6/17/2021 | Alaska State Virology Laboratory                    | Alaska State Virology Laboratory                                                          | Stephanie DeRonde, Elva House, Jacob Zidek, Lisa Smith, Ph.D., Jack Chen, Ph.D.                                                                                                                                                                                                                                      |
| hCoV-19/USA/AK-PHL10353/2021      | EPI_ISL_3159501 | 6/14/2021 | Alaska State Virology Laboratory                    | Alaska State Virology Laboratory                                                          | Stephanie DeRonde, Elva House, Jacob Zidek, Lisa Smith, Ph.D., Jack Chen, Ph.D.                                                                                                                                                                                                                                      |
| hCoV-19/USA/CA-SEARCH-32732/2021  | EPI_ISL_3215644 | 5/5/2021  | EXCITE Lab                                          | Andersen lab at Scripps Research                                                          | David Pride, Sharon Reed, Chip Schooley, Angela Scioscia, Natasha Martin Cheryl Anderson, Sawyer Farmer, Abigail Schnapper, Helena Tubb, Tommy Valles + SEARCH                                                                                                                                                       |
| hCoV-19/USA/AK-CDC-2-3845923/2021 | EPI_ISL_3353731 | 1/15/2021 | AK State Public Health Lab, State Health Department | Centers for Disease Control and Prevention Division of Viral Diseases, Pathogen Discovery | Mili Sheth, Sarah Nobles, Jasmine Padilla, Alex Burgin, Meghan Bentz, Mark Burroughs, Peter Cook, Clinton Paden, Dhvani Batra, Krista Queen, Kristen Knipe, Dakota Howard, Yvette Unoarumhi, Matthew Schmeier, Ben Rambo-Martin, Kristine Lacey, Sam Shepard, Dave Wentworth, Vivien Dugan, Suxiang Tong, Justin Lee |
| hCoV-19/USA/AK-CDC-2-3845944/2021 | EPI_ISL_3353734 | 1/11/2021 | AK State Public Health Lab, State Health Department | Centers for Disease Control and Prevention Division of Viral Diseases, Pathogen Discovery | Mili Sheth, Sarah Nobles, Jasmine Padilla, Alex Burgin, Meghan Bentz, Mark Burroughs, Peter Cook, Clinton Paden, Dhvani Batra, Krista Queen, Kristen Knipe, Dakota Howard, Yvette Unoarumhi, Matthew Schmeier, Ben Rambo-Martin, Kristine Lacey, Sam Shepard, Dave Wentworth, Vivien Dugan, Suxiang Tong, Justin Lee |
| hCoV-19/USA/AK-CDC-2-3925257/2021 | EPI_ISL_3354027 | 2/8/2021  | AK State Public Health Lab, State Health Department | Centers for Disease Control and Prevention Division of Viral Diseases, Pathogen Discovery | Mili Sheth, Sarah Nobles, Jasmine Padilla, Alex Burgin, Meghan Bentz, Mark Burroughs, Peter Cook, Clinton Paden, Dhvani Batra, Krista Queen, Kristen Knipe, Dakota Howard, Yvette Unoarumhi, Matthew Schmeier, Ben Rambo-Martin, Kristine Lacey, Sam Shepard, Dave Wentworth, Vivien Dugan, Suxiang Tong, Justin Lee |
| hCoV-19/USA/AK-CDC-2-3980576/2021 | EPI_ISL_3354174 | 2/22/2021 | AK State Public Health Lab, State Health Department | Centers for Disease Control and Prevention Division of Viral Diseases, Pathogen Discovery | Mili Sheth, Sarah Nobles, Jasmine Padilla, Alex Burgin, Meghan Bentz, Mark Burroughs, Peter Cook, Clinton Paden, Dhvani Batra, Krista Queen, Kristen Knipe, Dakota Howard, Yvette Unoarumhi, Matthew Schmeier, Ben Rambo-Martin, Kristine Lacey, Sam Shepard, Dave Wentworth, Vivien Dugan, Suxiang Tong, Justin Lee |
| hCoV-19/USA/AK-CDC-2-4043802/2021 | EPI_ISL_3354314 | 3/9/2021  | AK State Public Health Lab, State Health Department | Centers for Disease Control and Prevention Division of Viral Diseases, Pathogen Discovery | Mili Sheth, Sarah Nobles, Jasmine Padilla, Alex Burgin, Meghan Bentz, Mark Burroughs, Peter Cook, Clinton Paden, Dhvani Batra, Krista Queen, Kristen Knipe, Dakota Howard, Yvette Unoarumhi, Matthew Schmeier, Ben Rambo-Martin, Kristine Lacey, Sam Shepard, Dave Wentworth, Vivien Dugan, Suxiang Tong, Justin Lee |

|                                       |                 |           |                                                     |                                                                                              |                                                                                                                                                                                                                                                                                                                                                                                                                                                                                                                                                                                                                                                                                                                                                                                                                                                                                                                                                                                                                    |
|---------------------------------------|-----------------|-----------|-----------------------------------------------------|----------------------------------------------------------------------------------------------|--------------------------------------------------------------------------------------------------------------------------------------------------------------------------------------------------------------------------------------------------------------------------------------------------------------------------------------------------------------------------------------------------------------------------------------------------------------------------------------------------------------------------------------------------------------------------------------------------------------------------------------------------------------------------------------------------------------------------------------------------------------------------------------------------------------------------------------------------------------------------------------------------------------------------------------------------------------------------------------------------------------------|
| hCoV-19/USA/AK-CDC-2-4242677/2021     | EPI_ISL_3354794 | 4/1/2021  | AK State Public Health Lab, State Health Department | Centers for Disease Control and Prevention<br>Division of Viral Diseases, Pathogen Discovery | Mili Sheth,Sarah Nobles,Jasmine Padilla,Alex Burgin,Meghan Bentz,Mark Burroughs,Peter Cook,Clinton Paden,Dhwani Batra,Krista Queen,Kristen Knipe,Dakota Howard,Yvette Unoarumhi,Matthew Schmeier,Ben Rambo-Martin,Kristine Lacey,Sam Shepard,Dave Wentworth,Vivien Dugan,Suxiang Tong,Justin Lee                                                                                                                                                                                                                                                                                                                                                                                                                                                                                                                                                                                                                                                                                                                   |
| hCoV-19/USA/AK-CDC-2-4523971/2021     | EPI_ISL_3355081 | 5/18/2021 | AK State Public Health Lab, State Health Department | Centers for Disease Control and Prevention<br>Division of Viral Diseases, Pathogen Discovery | Mili Sheth,Sarah Nobles,Jasmine Padilla,Alex Burgin,Meghan Bentz,Mark Burroughs,Peter Cook,Clinton Paden,Dhwani Batra,Krista Queen,Kristen Knipe,Dakota Howard,Yvette Unoarumhi,Matthew Schmeier,Ben Rambo-Martin,Kristine Lacey,Sam Shepard,Dave Wentworth,Vivien Dugan,Suxiang Tong,Justin Lee                                                                                                                                                                                                                                                                                                                                                                                                                                                                                                                                                                                                                                                                                                                   |
| hCoV-19/USA/AK-PHL11275/2021          | EPI_ISL_3668698 | 6/18/2021 | Alaska State Virology Laboratory                    | Alaska State Virology Laboratory                                                             | Stephanie DeRonde, Elva House, Jacob Zidek, Lisa Smith, Ph.D., Jack Chen, Ph.D.                                                                                                                                                                                                                                                                                                                                                                                                                                                                                                                                                                                                                                                                                                                                                                                                                                                                                                                                    |
| hCoV-19/USA/AK-PHL12647/2021          | EPI_ISL_4298582 | 6/15/2021 | Alaska State Virology Laboratory                    | Alaska State Virology Laboratory                                                             | Stephanie DeRonde, Elva House, Jacob Zidek, Lisa Smith, Ph.D., Jack Chen, Ph.D.                                                                                                                                                                                                                                                                                                                                                                                                                                                                                                                                                                                                                                                                                                                                                                                                                                                                                                                                    |
| hCoV-19/USA/AK-CDC-STM-000038524/2021 | EPI_ISL_4346709 | 3/18/2021 | Helix/Illumina                                      | Centers for Disease Control and Prevention<br>Division of Viral Diseases, Pathogen Discovery | Dakota Howard,Dhwani Batra,Peter Cook,Kara Moser,Adrian Paskey,Jason Caravas,Benjamin Rambo-Martin,Shatavia Morrison,Christopher Gulvick,Scott Sammons,Yvette Unoarumhi,Darlene Wagner,Matthew Schmeier,Eileen De Feo,Jan Antico,Christine Tran,Matthew Tolentino,Shannon Wickline,Kim Gietzen,Brad Sickler,Jingtao Liu,Eric Allen,Phil Febbo,Nicole Washington,Simon White,Geraint Levan,Kelly Barrett,Elizabeth Cirulli,Alexandre Bolze,Ary Ascencio,Charlotte Rivera-Garcia,Ryan Cho,Jason Nguyen,Sherry Wang,Jimmy Ramirez,Tyler Cassens,Efren Sandoval,Magnus Isaksson,William Lee,David Becker,Marc Laurent,James Lu,Clinton Paden,Duncan MacCannell,Kristine Lacey                                                                                                                                                                                                                                                                                                                                          |
| hCoV-19/USA/AK-CDC-ASC210065587/2021  | EPI_ISL_4361363 | 5/19/2021 | Aegis Sciences Corporation                          | Centers for Disease Control and Prevention<br>Division of Viral Diseases, Pathogen Discovery | Dakota Howard,Dhwani Batra,Peter Cook,Jason Caravas,Benjamin Rambo-Martin,Scott Sammons,Yvette Unoarumhi,Matthew Schmeier,Kristine Lacey,Tymeckia Kendall,Victoria Caban Figueroa,Shatavia Morrison,Christopher Gulvick,Erisa Sula,Cyndi Clark,Patrick Campbell,Rob Case,Vikramsinha Ghorpade,Holly Houdeshell,Ola Kvalvaag,Dillon Nall,Ethan Sanders,Alec Vest,Shaun Westlund,Matthew Hardison,Clinton Paden,Duncan MacCannell                                                                                                                                                                                                                                                                                                                                                                                                                                                                                                                                                                                    |
| hCoV-19/USA/AK-CDC-QDX25930999/2021   | EPI_ISL_4369913 | 6/16/2021 | Quest Diagnostics Incorporated                      | Centers for Disease Control and Prevention<br>Division of Viral Diseases, Pathogen Discovery | Dakota Howard,Dhwani Batra,Peter Cook,Jason Caravas,Benjamin Rambo-Martin,Scott Sammons,Yvette Unoarumhi,Matthew Schmeier,Kristine Lacey,Tymeckia Kendall,Victoria Caban Figueroa,Shatavia Morrison,Christopher Gulvick,Erisa Sula,S. Rosenthal,A. Gerasimova,R. Kagan,B. Anderson,M. Hua,Y. Liu,L. Bernstein,K. Livingston,A. Perez,J. Shlyakhter,R. Rolando,R. Owen,P. Tanpaiboon,F. Lacbawan,Clinton Paden,Duncan MacCannell                                                                                                                                                                                                                                                                                                                                                                                                                                                                                                                                                                                    |
| hCoV-19/USA/AK-CDC-LC0069159/2021     | EPI_ISL_4373364 | 6/1/2021  | Laboratory Corporation of America                   | Centers for Disease Control and Prevention<br>Division of Viral Diseases, Pathogen Discovery | Dakota Howard,Dhwani Batra,Peter Cook,Jason Caravas,Benjamin Rambo-Martin,Scott Sammons,Yvette Unoarumhi,Matthew Schmeier,Kristine Lacey,Tymeckia Kendall,Victoria Caban Figueroa,Shatavia Morrison,Christopher Gulvick,Minoo Agarwal,Eyad Almasri,Debbie Boles,Ayla Burns,Nuthawin Charoensri,Oren Cohen,Susan Countryman,Mary Cristobal,Bobbi Croy,Suzanne Dale,Hrushikesh Deshmukh,Amanda Douglas,Vincent Drouillon,Marcia Eisenberg,Howard Engler,Rama Ghatti,Prashant Gupta,Susan Hicks,Jake Humphrey,Lax Iyer,Lisa Pfefferle,Manoj Jain,Matthew Robinson,Mohan Kolli,Brian Krueger,Tim Kuphal,Stanley Letovsky,Michael Levandoski,Craig Lukaski,Jonathan Meltzer,Brian Norvell,Mindy Nye,Scott Parker,Christos Petropoulos,John Pruitt,Steven Ragan,Scott Ryan,Mike Sapeta,Jana Schroth,Suresh Selvaraju,Goran Stevovic,Amanda Suchanek,Andrea Throop,Lyndon Tilson,Thomas Urban,Joe Voshell,Kimberly Wagner,Jonathan Williams,Mary Williamson,Qian Zeng,Tricia Zwiefelhofer,Clinton Paden,Duncan MacCannell |

|                                         |                 |           |                                   |                                                                                              |                                                                                                                                                                                                                                                                                                                                                                                                                                                                                                                                                                                                                                                                                                                                                                                                                                                                                                                                                                                                                   |
|-----------------------------------------|-----------------|-----------|-----------------------------------|----------------------------------------------------------------------------------------------|-------------------------------------------------------------------------------------------------------------------------------------------------------------------------------------------------------------------------------------------------------------------------------------------------------------------------------------------------------------------------------------------------------------------------------------------------------------------------------------------------------------------------------------------------------------------------------------------------------------------------------------------------------------------------------------------------------------------------------------------------------------------------------------------------------------------------------------------------------------------------------------------------------------------------------------------------------------------------------------------------------------------|
| hCoV-19/USA/AK-CDC-LC0073596/2021       | EPI_ISL_4373811 | 6/14/2021 | Laboratory Corporation of America | Centers for Disease Control and Prevention<br>Division of Viral Diseases, Pathogen Discovery | Dakota Howard,Dhwani Batra,Peter Cook,Jason Caravas,Benjamin Rambo-Martin,Scott Sammons,Yvette Unoarumhi,Matthew Schmerer,Kristine Lacey,Tymecia Kendall,Victoria Caban Figueroa,Shatavia Morrison,Christopher Gulvick,Minoo Agarwal,Eyad Almasri,Debbie Boles,Ayla Burns,Nuthawin Charoensri,Oren Cohen,Susan Countryman,Mary Cristobal,Bobbi Croy,Suzanne Dale,Hrushikesh Deshmukh,Amanda Douglas,Vincent Drouillon,Marcia Eisenberg,Howard Engler,Rama Gharti,Prashant Gupta,Susan Hicks,Jake Humphrey,Lax Iyer,Lisa Pfefferle,Manoj Jain,Matthew Robinson,Mohan Kolli,Brian Krueger,Tim Kuphal,Stanley Letovsky,Michael Levandoski,Craig Lukasik,Jonathan Meltzer,Brian Norvell,Mindy Nye,Scott Parker,Christos Petropoulos,John Pruitt,Steven Ragan,Scott Ryan,Mike Sapeta,Jana Schroth,Suresh Selvaraju,Goran Stevovic,Amanda Suchanek,Andrea Throop,Lyndon Tilson,Thomas Urban,Joe Voshell,Kimberly Wagner,Jonathan Williams,Mary Williamson,Qian Zeng,Tricia Zwiefelhofer,Clinton Paden,Duncan MacCannell |
| hCoV-19/USA/AK-CDC-LC0071119/2021       | EPI_ISL_4376278 | 6/7/2021  | Laboratory Corporation of America | Centers for Disease Control and Prevention<br>Division of Viral Diseases, Pathogen Discovery | Dakota Howard,Dhwani Batra,Peter Cook,Jason Caravas,Benjamin Rambo-Martin,Scott Sammons,Yvette Unoarumhi,Matthew Schmerer,Kristine Lacey,Tymecia Kendall,Victoria Caban Figueroa,Shatavia Morrison,Christopher Gulvick,Minoo Agarwal,Eyad Almasri,Debbie Boles,Ayla Burns,Nuthawin Charoensri,Oren Cohen,Susan Countryman,Mary Cristobal,Bobbi Croy,Suzanne Dale,Hrushikesh Deshmukh,Amanda Douglas,Vincent Drouillon,Marcia Eisenberg,Howard Engler,Rama Gharti,Prashant Gupta,Susan Hicks,Jake Humphrey,Lax Iyer,Lisa Pfefferle,Manoj Jain,Matthew Robinson,Mohan Kolli,Brian Krueger,Tim Kuphal,Stanley Letovsky,Michael Levandoski,Craig Lukasik,Jonathan Meltzer,Brian Norvell,Mindy Nye,Scott Parker,Christos Petropoulos,John Pruitt,Steven Ragan,Scott Ryan,Mike Sapeta,Jana Schroth,Suresh Selvaraju,Goran Stevovic,Amanda Suchanek,Andrea Throop,Lyndon Tilson,Thomas Urban,Joe Voshell,Kimberly Wagner,Jonathan Williams,Mary Williamson,Qian Zeng,Tricia Zwiefelhofer,Clinton Paden,Duncan MacCannell |
| hCoV-19/USA/AK-CDC-IBX178701677804/2021 | EPI_ISL_4388562 | 4/24/2021 | Infinity Biologix                 | Centers for Disease Control and Prevention<br>Division of Viral Diseases, Pathogen Discovery | Dakota Howard,Dhwani Batra,Peter Cook,Jason Caravas,Benjamin Rambo-Martin,Scott Sammons,Yvette Unoarumhi,Matthew Schmerer,Kristine Lacey,Tymecia Kendall,Victoria Caban Figueroa,Shatavia Morrison,Christopher Gulvick,Erisa Sula,Christian Bixby,YiHe Wang,Jonathan Schultz,Chirayu Goswami,Russ Hager,Robin Grimwood,Clinton Paden,Duncan MacCannell                                                                                                                                                                                                                                                                                                                                                                                                                                                                                                                                                                                                                                                            |
| hCoV-19/USA/AK-ASU19578/2021            | EPI_ISL_5644516 | 1/24/2021 | Arizona State University          | Arizona State University                                                                     | Ajeet Bains, LaRinda A. Holland, Matthew F. Smith, Regan A. Sullins, Nicholas J. Mellor, Nathaniel Johnson, Joshua LaBaer, Vel Murugan, Efreem S. Lim                                                                                                                                                                                                                                                                                                                                                                                                                                                                                                                                                                                                                                                                                                                                                                                                                                                             |
